# Supplementary material for: The origin of experimental regioselectivity in ring-closing reaction of pyrido[1,2-e]purine systems and comparison of the aromaticity character of probable products: a mechanistic study based on DFT insights
Source: Royal Society of Chemistry journal article supplement (doi:10.1039/d3nj01276j), 2023-01-01
Supplement: d3nj01276j1.pdf [file d3nj01276j1.pdf]

## Supporting information for:

### **The Origin of Experimental Regioselectivity in Ring-Closing Reaction of pyrido[1,2-e]purine Systems and Comparison the Aromaticity Character of Probable Products; A Mechanistic Study Based on the DFT Insights**

Parvin Moghimi<sup>a</sup>, Shadi Bolourian<sup>b</sup>, Ali Shiri<sup>a</sup>, Hossein Eshghi<sup>a</sup>, Fereshteh Hosseini<sup>b</sup> and Hossein Sabet-Sarvestani<sup>\*b</sup>

<sup>a</sup>Department of Food Additives, Food Science and Technology Research Institute, Research Center for Iranian Academic Center for Education, Culture and Research (ACECR), Khorasan Razavi Branch, Mashhad, IRAN

<sup>b</sup>Department of Chemistry, Faculty of Science, Ferdowsi University of Mashhad, Mashhad, IRAN

*\* Correspondence to: Hossein Sabet-Sarvestani. TeleFax: ++989371411532 (E-mail address: bozorgmehr1388@gmail.com)*

| Table 1(S). Absolute energy values of the involved species |                       |              |              |                                                |              |               |                 |
|------------------------------------------------------------|-----------------------|--------------|--------------|------------------------------------------------|--------------|---------------|-----------------|
| M06-2X/ def2svp                                            |                       |              |              |                                                |              |               | M06-2X/def2tzvp |
|                                                            | species               | G<br>(a.u)   | H<br>(a.u)   | S<br>(cal.mol <sup>-1</sup> .K <sup>-1</sup> ) | E<br>(a.u)   | E<br>(a.u)    |                 |
| H                                                          | Triethyl orthoformate | -501.24108   | -501.186693  | 114.466                                        | -501.4329161 | -502.0165008  |                 |
|                                                            | (2)                   | -714.620387  | -714.567052  | 112.251                                        | -714.7857728 | -715.5818295  |                 |
|                                                            | In1                   | -1215.856901 | -1215.769522 | 183.905                                        | -1216.237153 | -1217.6104286 |                 |
|                                                            | In2                   | -1061.06581  | -1060.992061 | 155.218                                        | -1061.371233 | -1062.563457  |                 |
|                                                            | In3                   | -906.277883  | -906.212816  | 136.945                                        | -906.5020799 | -907.5152981  |                 |
|                                                            | In4(1)                | -906.25389   | -906.192375  | 129.468                                        | -906.4823198 | -907.4951235  |                 |
|                                                            | Product               | -906.277168  | -906.212552  | 135.996                                        | -906.5005672 | -907.51832    |                 |
|                                                            | TS1                   | -1215.821742 | -1215.735412 | 181.697                                        | -1216.200203 | -1217.5763216 |                 |
|                                                            | TS2                   | -1061.035641 | -1060.962404 | 154.14                                         | -1061.338378 | -1062.5314059 |                 |
|                                                            | TS3                   | -906.221504  | -906.161427  | 126.444                                        | -906.448398  | -907.464166   |                 |
|                                                            | TS4                   | -906.226486  | -906.164388  | 130.697                                        | -906.4515584 | -907.4667894  |                 |
|                                                            |                       |              |              |                                                |              |               |                 |
|                                                            |                       | (2)          | -714.619268  | -714.565515                                    | 113.134      | -714.7841545  | -715.5801443    |
|                                                            |                       | In1          | -1215.852929 | -1215.761164                                   | 193.135      | -1216.228345  | -1217.6025359   |
|                                                            |                       | In2          | -1061.065372 | -1060.990726                                   | 157.104      | -1061.369717  | -1062.5619094   |
|                                                            |                       | In3          | -906.277091  | -906.211493                                    | 138.062      | -906.5005704  | -907.5136685    |
|                                                            |                       | In4(2)       | -906.258098  | -906.197037                                    | 128.514      | -906.4869562  | -907.5002493    |
|                                                            |                       | Product      | -906.229665  | -906.168376                                    | 128.992      | -906.5057242  | -907.5244821    |
|                                                            |                       | TS1          | -1215.820252 | -1215.733458                                   | 182.675      | -1216.198244  | -1217.5745523   |
|                                                            |                       | TS2          | -1061.033589 | -1060.961167                                   | 152.424      | -1061.337161  | -1062.5299702   |
|                                                            | TS3                   | -906.223804  | -906.163283  | 127.376                                        | -906.4513942 | -907.4670036  |                 |
|                                                            | TS4                   | -906.229665  | -906.168376  | 128.992                                        | -906.455311  | -907.4706269  |                 |
| Me                                                         | Triethyl orthoacetate | -540.480037  | -540.424141  | 117.643                                        | -540.6989464 | -541.3247782  |                 |
|                                                            | In1                   | -1255.102023 | -1255.012457 | 188.508                                        | -1255.508495 | -1256.9233119 |                 |
|                                                            | In2                   | -1100.304012 | -1100.228057 | 159.861                                        | -1100.635699 | -1101.8698464 |                 |
|                                                            | In3                   | -945.519865  | -945.45055   | 145.885                                        | -945.7691436 | -946.8261456  |                 |
|                                                            | In4(1)                | -945.502507  | -945.437845  | 136.094                                        | -945.7563207 | -946.8100188  |                 |
|                                                            | Product               | -945.520878  | -945.450643  | 147.821                                        | -945.7692596 | -946.8297875  |                 |
|                                                            | TS1                   | -1255.070363 | -1254.980968 | 188.146                                        | -1255.474436 | -1256.8918913 |                 |
|                                                            | TS2                   | -1100.278996 | -1100.203509 | 158.876                                        | -1100.608523 | -1101.8450633 |                 |
|                                                            | TS3                   | -945.470332  | -945.40523   | 137.019                                        | -945.7222282 | -946.781162   |                 |
|                                                            | TS4                   | -945.47036   | -945.404984  | 137.596                                        | -945.7213481 | -946.7770131  |                 |
|                                                            |                       |              |              |                                                |              |               |                 |
|                                                            |                       | In1          | -1255.095783 | -1255.003381                                   | 194.478      | -1255.499055  | -1256.9149734   |
|                                                            |                       | In2          | -1100.310224 | -1100.233423                                   | 161.642      | -1100.641201  | -1101.8741671   |
|                                                            |                       | In3          | -945.51862   | -945.449018                                    | 146.491      | -945.7674538  | -946.8243744    |
|                                                            |                       | In4(1)       | -945.495352  | -945.433585                                    | 130.000      | -945.752952   | -946.8084141    |
|                                                            |                       | Product      | -945.5295    | -945.461062                                    | 144.04       | -945.77969    | -946.8383958    |
|                                                            |                       | TS1          | -1255.068848 | -1254.980718                                   | 185.485      | -1255.474446  | -1256.8922726   |
|                                                            | TS2                   | -1100.277211 | -1100.202466 | 157.315                                        | -1100.607372 | -1101.8437147 |                 |
|                                                            | TS3                   | -945.472327  | -945.408237  | 134.889                                        | -945.725506  | -946.784 1272 |                 |
|                                                            | TS4                   | -945.470594  | -945.408146  | 131.433                                        | -945.7244007 | -946.7819982  |                 |

| Table 1(S). Continued |                          |              |              |                                                |               |               |                 |
|-----------------------|--------------------------|--------------|--------------|------------------------------------------------|---------------|---------------|-----------------|
| M06-2X/ def2svp       |                          |              |              |                                                |               |               | M06-2X/def2tzvp |
|                       | species                  | G<br>(a.u)   | H<br>(a.u)   | S<br>(cal.mol <sup>-1</sup> .K <sup>-1</sup> ) | E<br>(a.u)    | E<br>(a.u)    |                 |
| Et                    | Triethyl orthopropionate | -579.713485  | -579.655095  | 122.893                                        | -579.9599054  | -580.6290839  |                 |
|                       | In1                      | -1294.336745 | -1294.242366 | 198.638                                        | -1294.768341  | -1296.2262269 |                 |
|                       | In2                      | -1139.539562 | -1139.463046 | 161.04                                         | -1139.899805  | -1141.1765908 |                 |
|                       | In3                      | -984.754481  | -984.682521  | 151.453                                        | -985.0312357  | -986.1315761  |                 |
|                       | In4(1)                   | -984.741187  | -984.672952  | 143.613                                        | -985.0211995  | -986.1177396  |                 |
|                       | Product                  | -984.754793  | -984.681933  | 153.348                                        | -985.0306378  | -986.1348968  |                 |
|                       | TS1                      | -1294.30729  | -1294.214875 | 194.502                                        | -1294.738398  | -1296.1983388 |                 |
|                       | TS2                      | -1139.516165 | -1139.437919 | 164.683                                        | -1139.8 73061 | -1141.1524828 |                 |
|                       | TS3                      | -984.712319  | -984.644175  | 143.42                                         | -984.9913017  | -986.0933512  |                 |
|                       | TS4                      | -984.709151  | -984.639488  | 146.617                                        | -984.9859279  | -986.0847775  |                 |
|                       |                          |              |              |                                                |               |               |                 |
|                       |                          | In1          | -1294.330445 | -1294.236469                                   | 197.79        | -1294.762575  | -1296.2217513   |
|                       |                          | In2          | -1139.538718 | -1139.45897                                    | 167.845       | -1139.896461  | -1141.1714034   |
|                       |                          | In3          | -984.752685  | -984.680986                                    | 150.903       | -985.0295876  | -986.1299606    |
|                       |                          | In4(2)       | -984.7338    | -984.668758                                    | 136.892       | -985.0178743  | -986.1161398    |
|                       |                          | Product      | -984.761029  | -984.689278                                    | 151.011       | -985.0375216  | -986.1434799    |
|                       |                          | TS1          | -1294.303252 | -1294.214739                                   | 186.291       | -1294.738637  | -1296.1994276   |
|                       |                          | TS2          | -1139.514631 | -1139.436884                                   | 163.633       | -1139.8 71885 | -1141.1510154   |
|                       | TS3                      | -984.690442  | -984.637683  | 138.611                                        | -984.984851   | -986.0870275  |                 |
|                       | TS4                      | -984.70904   | -984.643128  | 138.724                                        | -984.9891274  | -986.0897466  |                 |

**Table 2(S).** Calculated thermodynamic and kinetic parameters of the step 4 as RDS of the reaction in wb97xd/6-31+g(d,p) level

| wb97xd/6-31+g(d,p) |    |      |              |              |              |                 |
|--------------------|----|------|--------------|--------------|--------------|-----------------|
| Route              | R  | Step | $\Delta G^1$ | $\Delta H^1$ | $\Delta S^2$ | $\Delta G^{*1}$ |
| Route 1            | H  | 4(1) | 14.07        | 11.06        | -10.102      | 31.77           |
|                    | Me | 4(1) | 9.26         | 8.16         | -3.696       | 27.09           |
|                    | Et | 4(1) | 7.38         | 4.46         | -9.79        | 24.40           |
| Route 2            | H  | 4(2) | 10.90        | 7.06         | -12.858      | 31.02           |
|                    | Me | 4(2) | 11.85        | 8.53         | -11.117      | 25.96           |
|                    | Et | 4(2) | 10.45        | 6.67         | -12.667      | 30.80           |

1) kcal.mol<sup>-1</sup>

2) cal.mol<sup>-1</sup>K<sup>-1</sup>

**Table 3(S).** Absolute energy values of the involved species correspond to step 4 in wb97xd/6-31+g(d,p) level

|                                          |           |               | <b>wb97xd/6-31+g(d,p)</b> |                    |                                                    |
|------------------------------------------|-----------|---------------|---------------------------|--------------------|----------------------------------------------------|
| <b>Route</b>                             | <b>R</b>  | <b>Step</b>   | <b>G<br/>(a.u)</b>        | <b>H<br/>(a.u)</b> | <b>S<br/>(cal.mol<sup>-1</sup>.K<sup>-1</sup>)</b> |
| <b>Route 1</b>                           | <b>H</b>  | <b>In3</b>    | -907.066255               | -907.000782        | 137.800                                            |
|                                          |           | <b>In4(1)</b> | -907.043829               | -906.983156        | 127.698                                            |
|                                          |           | <b>TS3</b>    | -907.015628               | -906.953816        | 130.094                                            |
|                                          | <b>Me</b> | <b>In3</b>    | -946.348173               | -946.282632        | 137.943                                            |
|                                          |           | <b>In4(1)</b> | -946.33341                | -946.269625        | 134.247                                            |
|                                          |           | <b>TS3</b>    | -946.305009               | -946.240598        | 135.564                                            |
|                                          | <b>Et</b> | <b>In3</b>    | -985.62681                | -985.555624        | 149.823                                            |
|                                          |           | <b>In4(1)</b> | -985.615055               | -985.548521        | 140.033                                            |
|                                          |           | <b>TS3</b>    | -985.587922               | -985.521007        | 140.833                                            |
| <b>Route 2</b>                           | <b>H</b>  | <b>In3</b>    | -907.066232               | -906.999345        | 140.775                                            |
|                                          |           | <b>In4(1)</b> | -907.048865               | -906.988087        | 127.917                                            |
|                                          |           | <b>TS3</b>    | -907.016801               | -906.956127        | 127.699                                            |
|                                          | <b>Me</b> | <b>In3</b>    | -946.347619               | -946.27978         | 142.781                                            |
|                                          |           | <b>In4(1)</b> | -946.328742               | -946.266184        | 131.664                                            |
|                                          |           | <b>TS3</b>    | -946.306256               | -946.242957        | 133.222                                            |
|                                          | <b>Et</b> | <b>In3</b>    | -985.62482                | -985.553811        | 149.451                                            |
|                                          |           | <b>In4(1)</b> | -985.608172               | -985.543182        | 136.784                                            |
|                                          |           | <b>TS3</b>    | -985.57574                | -985.514955        | 138.457                                            |
| 1) kcal.mol <sup>-1</sup>                |           |               |                           |                    |                                                    |
| 2) cal.mol <sup>-1</sup> K <sup>-1</sup> |           |               |                           |                    |                                                    |

## Cartesian coordinate of species

### Route 1

H:

### Triethyl orthoformate

O 1

|   |             |             |             |
|---|-------------|-------------|-------------|
| C | -0.13221600 | -0.15919500 | 0.25758700  |
| H | -0.17851800 | -0.12400400 | 1.37288600  |
| O | -1.34124200 | 0.23206800  | -0.27740500 |
| O | 0.14631900  | -1.44225100 | -0.16524300 |
| O | 0.85186900  | 0.69495300  | -0.19760400 |
| C | 0.80009700  | 1.99380000  | 0.36758300  |
| H | -0.15217400 | 2.47725500  | 0.09589300  |
| H | 0.83005500  | 1.91517800  | 1.46981900  |
| C | 1.27224400  | -2.05574600 | 0.44568500  |
| H | 1.00095900  | -3.10765200 | 0.61737400  |
| H | 1.45487200  | -1.59703600 | 1.43290300  |
| C | -2.46745100 | -0.41466400 | 0.28985900  |
| H | -2.45712800 | -0.27577300 | 1.38654600  |
| H | -2.40875000 | -1.49738800 | 0.09310700  |
| C | 1.97868200  | 2.78878600  | -0.14680800 |
| H | 1.94149700  | 2.86244100  | -1.24241700 |
| H | 1.96467100  | 3.80397500  | 0.27119400  |
| H | 2.92349900  | 2.30585800  | 0.13885400  |
| C | 2.51122800  | -1.96527000 | -0.42569000 |
| H | 2.80282300  | -0.91754100 | -0.57053800 |
| H | 3.34454200  | -2.50794800 | 0.04230500  |
| H | 2.31500900  | -2.41499400 | -1.40918100 |
| C | -3.71803600 | 0.18040200  | -0.31597100 |
| H | -4.61062600 | -0.30589000 | 0.09901700  |
| H | -3.77449200 | 1.25689500  | -0.10353900 |
| H | -3.71908900 | 0.03979100  | -1.40567500 |

(2)

O 1

|   |             |             |             |
|---|-------------|-------------|-------------|
| C | 3.30996600  | -1.76224800 | 0.00210700  |
| C | 4.05657300  | -0.53562900 | 0.00034600  |
| C | 3.42904900  | 0.67681400  | -0.00131400 |
| C | 2.00113300  | 0.72771200  | -0.00135100 |
| N | 1.32258800  | -0.50608400 | 0.00024000  |
| C | 1.95225600  | -1.72616700 | 0.00190800  |
| N | 1.18008600  | 1.75674700  | -0.00291600 |
| C | -0.07341100 | 1.19712100  | -0.00232300 |

|   |             |             |             |
|---|-------------|-------------|-------------|
| C | -0.02141800 | -0.20261700 | -0.00056500 |
| C | -1.37708100 | 1.74482500  | -0.00262900 |
| N | -2.41343000 | 0.92624800  | -0.00307000 |
| C | -2.21767800 | -0.42246800 | -0.00152400 |
| N | -1.04358000 | -1.04772200 | 0.00016300  |
| C | -1.59637600 | 3.22527700  | 0.00499100  |
| N | -3.37472900 | -1.14099200 | -0.00220900 |
| N | -3.39771900 | -2.52179900 | 0.00188700  |
| H | 3.82233100  | -2.72265500 | 0.00366300  |
| H | 5.14615100  | -0.58043500 | 0.00045500  |
| H | 3.97749500  | 1.61789000  | -0.00258200 |
| H | 1.29675600  | -2.59695700 | 0.00328000  |
| H | -1.19208700 | 3.65914300  | 0.93160000  |
| H | -1.05837100 | 3.69401500  | -0.83117500 |
| H | -2.66571800 | 3.45055800  | -0.06689900 |
| H | -3.89225800 | -2.86031600 | 0.82619500  |
| H | -3.89337600 | -2.86505000 | -0.81975200 |
| H | -4.23150400 | -0.59669800 | -0.00132400 |

### In1

O 1

|   |             |             |             |
|---|-------------|-------------|-------------|
| C | 5.91352400  | -1.75245800 | 0.19525800  |
| C | 6.59939900  | -0.77634800 | -0.60386800 |
| C | 5.97407200  | 0.36169500  | -1.02467600 |
| C | 4.61069600  | 0.58775900  | -0.66231600 |
| N | 3.98991900  | -0.40207100 | 0.12334200  |
| C | 4.61741300  | -1.54809100 | 0.54613500  |
| N | 3.80635300  | 1.59212100  | -0.94043900 |
| C | 2.62356000  | 1.26587700  | -0.32510100 |
| C | 2.70175700  | 0.03659400  | 0.34230200  |
| C | 1.36928300  | 1.91255000  | -0.23800400 |
| N | 0.39790900  | 1.33178800  | 0.44267100  |
| C | 0.61020400  | 0.12710700  | 1.04846500  |
| N | 1.74566200  | -0.56782700 | 1.03463100  |
| C | 1.12961800  | 3.23005300  | -0.90640900 |
| N | -0.47552900 | -0.34299900 | 1.72262600  |
| N | -0.54995000 | -1.66332600 | 2.15019300  |
| H | 6.42319800  | -2.65655800 | 0.52367800  |
| H | 7.64057100  | -0.95393900 | -0.87549100 |
| H | 6.47611300  | 1.11473500  | -1.63065500 |
| H | 4.01100100  | -2.22458700 | 1.14843500  |
| H | 1.83152100  | 3.98262500  | -0.51866900 |
| H | 1.31500500  | 3.14380200  | -1.98683700 |
| H | 0.10044400  | 3.56283700  | -0.73428200 |
| H | -0.79133700 | -1.68122200 | 3.14000400  |
| H | -1.31195100 | -2.11516900 | 1.64003200  |
| H | -1.34572300 | 0.16552300  | 1.56332200  |
| C | -3.76591900 | -0.71743100 | 0.41720200  |
| H | -4.37253900 | -1.36179200 | 1.08473300  |

|   |             |             |             |
|---|-------------|-------------|-------------|
| O | -2.72008200 | -1.50151700 | -0.02630100 |
| O | -3.24760000 | 0.36656100  | 1.10807800  |
| O | -4.54708900 | -0.23434000 | -0.62031300 |
| C | -5.33344600 | -1.22795900 | -1.25932300 |
| H | -4.67972400 | -2.04080100 | -1.61876400 |
| H | -6.03647700 | -1.66494400 | -0.52771800 |
| C | -4.20278100 | 1.25511000  | 1.68172200  |
| H | -3.85269900 | 1.47545900  | 2.70049000  |
| H | -5.17563600 | 0.74441300  | 1.76497600  |
| C | -1.91504800 | -0.92602300 | -1.05827800 |
| H | -1.57778500 | 0.07572300  | -0.74798100 |
| H | -2.52202800 | -0.81172800 | -1.97064800 |
| C | -6.07498200 | -0.58510800 | -2.40851400 |
| H | -5.36521000 | -0.16463600 | -3.13445300 |
| H | -6.69854600 | -1.32904300 | -2.92122300 |
| H | -6.72354500 | 0.22336400  | -2.04400000 |
| C | -4.32332400 | 2.52691600  | 0.86709600  |
| H | -4.69905000 | 2.29858500  | -0.13838400 |
| H | -5.01128500 | 3.23070500  | 1.35598900  |
| H | -3.34001800 | 3.01009900  | 0.77559400  |
| C | -0.74192100 | -1.84751600 | -1.30456800 |
| H | -0.09372200 | -1.42776900 | -2.08644300 |
| H | -0.14447100 | -1.97586400 | -0.39091800 |
| H | -1.09111600 | -2.83559200 | -1.63640300 |

|   |             |             |             |
|---|-------------|-------------|-------------|
| H | -2.75067600 | 0.20255900  | -2.46420000 |
| H | -1.84914600 | 2.19238900  | -1.31577100 |
| C | -3.21197400 | 0.03299100  | -0.49251500 |
| H | -3.73793600 | 0.99013900  | -0.26412400 |
| O | -2.53606800 | -0.37998500 | 0.64880200  |
| O | -4.11933400 | -0.90650200 | -0.94403000 |
| C | -2.73963000 | 0.35405300  | 1.84564400  |
| H | -2.64561200 | -0.36944600 | 2.66831200  |
| H | -3.76860100 | 0.75261900  | 1.88044300  |
| C | -1.72427100 | 1.46941800  | 2.00236300  |
| H | -1.83858100 | 2.22547700  | 1.21227100  |
| H | -1.84476700 | 1.96438200  | 2.97626500  |
| H | -0.70435400 | 1.06157200  | 1.93877500  |
| C | -5.26257900 | -1.10123600 | -0.12652200 |
| H | -6.09149300 | -1.33316100 | -0.81011700 |
| H | -5.51829400 | -0.15754200 | 0.38700300  |
| C | -5.07861500 | -2.23197300 | 0.87027800  |
| H | -6.01574400 | -2.40843200 | 1.41639000  |
| H | -4.80704800 | -3.15614500 | 0.34118700  |
| H | -4.28581900 | -2.00320400 | 1.59375600  |

### In3

O 1

|   |             |             |             |
|---|-------------|-------------|-------------|
| C | 3.40641100  | -3.01571100 | -0.01153200 |
| C | 4.67828200  | -2.35636700 | 0.08223400  |
| C | 4.76994100  | -0.99528900 | 0.13363800  |
| C | 3.57695200  | -0.21052000 | 0.09241700  |
| N | 2.35962000  | -0.91099200 | 0.00169500  |
| C | 2.26550200  | -2.28025400 | -0.05061100 |
| N | 3.40862600  | 1.09561200  | 0.12332200  |
| C | 2.05040400  | 1.26963300  | 0.05004700  |
| C | 1.37035500  | 0.04637700  | -0.02639300 |
| C | 1.22363700  | 2.41686700  | 0.03340200  |
| N | -0.08528000 | 2.25668900  | -0.05186000 |
| C | -0.61045900 | 1.00529100  | -0.11922200 |
| N | 0.05967300  | -0.14129300 | -0.11037000 |
| C | 1.80372200  | 3.79334500  | 0.11498500  |
| N | -1.97530700 | 0.99467900  | -0.20694800 |
| N | -2.68591600 | -0.15416200 | -0.26559000 |
| H | 3.34699300  | -4.10180900 | -0.05232200 |
| H | 5.58530400  | -2.96117100 | 0.11114000  |
| H | 5.72469800  | -0.47593300 | 0.20444100  |
| H | 1.25535800  | -2.68335400 | -0.12258600 |
| H | 2.30729600  | 3.93040800  | 1.08339000  |
| H | 2.56460700  | 3.93128000  | -0.66615700 |
| H | 1.01520900  | 4.54530200  | 0.00489000  |
| H | -2.43114600 | 1.90496400  | -0.21350100 |
| C | -3.94614200 | -0.05255200 | -0.35388800 |
| H | -4.48951800 | 0.90824200  | -0.37306200 |
| O | -4.68960500 | -1.15890000 | -0.46118300 |

### In2

O 1

|   |             |             |             |
|---|-------------|-------------|-------------|
| C | 3.47106200  | -3.15597600 | -0.18734400 |
| C | 4.68804100  | -2.61099300 | 0.34478200  |
| C | 4.82108800  | -1.27369500 | 0.58435600  |
| C | 3.72864700  | -0.39862100 | 0.29913400  |
| N | 2.56228000  | -0.98799800 | -0.22262100 |
| C | 2.42596900  | -2.33327900 | -0.46244700 |
| N | 3.61773700  | 0.90577000  | 0.44219800  |
| C | 2.34969300  | 1.19309400  | 0.00555200  |
| C | 1.66742500  | 0.04214900  | -0.41325500 |
| C | 1.61812400  | 2.39683600  | -0.11065000 |
| N | 0.38404200  | 2.34650500  | -0.58073600 |
| C | -0.15906800 | 1.15460200  | -0.94139900 |
| N | 0.43170300  | -0.03203500 | -0.89062000 |
| C | 2.21092300  | 3.71078600  | 0.28973800  |
| N | -1.43855900 | 1.26707900  | -1.42533100 |
| N | -2.26226600 | 0.17621700  | -1.57169000 |
| H | 3.37658400  | -4.22440100 | -0.37264200 |
| H | 5.51834500  | -3.28440800 | 0.56025400  |
| H | 5.73487100  | -0.84030300 | 0.98870100  |
| H | 1.46325500  | -2.64781000 | -0.86549700 |
| H | 2.49382000  | 3.68850200  | 1.35227200  |
| H | 3.12917700  | 3.90280200  | -0.28395000 |
| H | 1.49166900  | 4.51860900  | 0.11781500  |

|   |             |             |             |
|---|-------------|-------------|-------------|
| C | -6.09842000 | -0.98327800 | -0.32456400 |
| H | -6.54753000 | -1.87290400 | -0.78232400 |
| H | -6.41493700 | -0.10597100 | -0.91221300 |
| C | -6.50944700 | -0.85067600 | 1.12766900  |
| H | -7.60206900 | -0.76703200 | 1.20248100  |
| H | -6.18598300 | -1.73132200 | 1.69921900  |
| H | -6.06578900 | 0.04558500  | 1.58524100  |

|   |             |             |             |
|---|-------------|-------------|-------------|
| C | -5.15513000 | -0.29966700 | 0.27473800  |
| C | -4.46243700 | 0.87324500  | 0.19049700  |
| C | -3.04437400 | 0.84314100  | 0.07162900  |
| N | -2.41532300 | -0.42223700 | 0.04353900  |
| C | -3.11997900 | -1.60588100 | 0.13174300  |
| N | -2.17812000 | 1.83317100  | -0.02034000 |
| C | -0.96156100 | 1.23420000  | -0.11068800 |
| C | -1.08689800 | -0.14849300 | -0.07430100 |
| C | 0.35197000  | 1.81930900  | -0.22733000 |
| N | 1.40354200  | 1.05020500  | -0.29918800 |
| C | 1.25385800  | -0.29562600 | -0.26461100 |
| N | 0.02517700  | -0.94492600 | -0.15418600 |
| C | 0.49223900  | 3.30483800  | -0.26113700 |
| N | 2.20282200  | -1.20991100 | -0.32913300 |
| N | 1.62662400  | -2.42450800 | -0.26568500 |
| H | -5.02708400 | -2.49098200 | 0.31622900  |
| H | -6.24103300 | -0.28669600 | 0.36667000  |
| H | -4.94936100 | 1.84707400  | 0.21177900  |
| H | -2.54819200 | -2.53035600 | 0.10776300  |
| H | -0.08361900 | 3.71643000  | -1.10258200 |
| H | 0.07232700  | 3.73924200  | 0.65765300  |
| H | 1.54653200  | 3.58391300  | -0.35774300 |
| H | 4.05742700  | -1.12810800 | -0.45294200 |
| C | 0.33152800  | -2.28004800 | -0.16173200 |
| H | -0.39393000 | -3.08463700 | -0.09381400 |
| O | 5.02866600  | -1.11234400 | -0.33349100 |
| C | 5.27484700  | -0.28712800 | 0.77619500  |
| H | 6.31994400  | -0.44994200 | 1.08645700  |
| H | 4.64323400  | -0.58008200 | 1.63741000  |
| C | 5.05378600  | 1.18552900  | 0.46383700  |
| H | 5.27759400  | 1.81675200  | 1.33658800  |
| H | 5.70295000  | 1.49791700  | -0.36750000 |
| H | 4.00724600  | 1.35722000  | 0.16883500  |

## In4

O 1

|   |             |             |             |
|---|-------------|-------------|-------------|
| C | -1.93135700 | -2.93865700 | -0.47929200 |
| C | -3.25382400 | -2.53809200 | -0.09609000 |
| C | -3.53317800 | -1.23165700 | 0.18295500  |
| C | -2.50001500 | -0.25500200 | 0.09620900  |
| N | -1.20804400 | -0.70187500 | -0.28236800 |
| C | -0.93194700 | -2.02448800 | -0.56868200 |
| N | -2.52285800 | 1.04123300  | 0.31972400  |
| C | -1.24266800 | 1.46116800  | 0.10424500  |
| C | -0.42355500 | 0.40674100  | -0.26366200 |
| C | -0.66082300 | 2.78536000  | 0.19934200  |
| N | 0.60980900  | 2.96585100  | 0.00070900  |
| C | 1.41209300  | 1.89123700  | -0.29945400 |
| N | 0.89049700  | 0.60226300  | -0.59083700 |
| C | -1.54311500 | 3.94013100  | 0.54661400  |
| N | 2.69562400  | 1.90416100  | -0.34085300 |
| N | 3.07145500  | 0.62122800  | -0.74134800 |
| H | -1.71268600 | -3.98083300 | -0.70718100 |
| H | -4.03958100 | -3.29069100 | -0.03046200 |
| H | -4.52676900 | -0.89548400 | 0.47683900  |
| H | 0.08900300  | -2.26436800 | -0.85754800 |
| H | -2.34749900 | 4.03404000  | -0.19754000 |
| H | -2.02649100 | 3.75914700  | 1.51782200  |
| H | -0.95932500 | 4.86560800  | 0.58577900  |
| C | 1.99540200  | -0.32043300 | -0.49736000 |
| H | 1.98940500  | -1.10384800 | -1.27344800 |
| O | 1.94875300  | -0.90453500 | 0.77825100  |
| C | 2.86711900  | -1.96983300 | 0.99476100  |
| H | 3.01975000  | -2.01331700 | 2.08088500  |
| H | 3.84524300  | -1.72658800 | 0.54498400  |
| C | 2.35458300  | -3.30274500 | 0.47977400  |
| H | 3.06426200  | -4.10015400 | 0.73964500  |
| H | 1.38378500  | -3.54202200 | 0.93615800  |
| H | 2.24226900  | -3.30789200 | -0.61468400 |
| H | 3.98094600  | 0.35026800  | -0.37859200 |

## Product

O 1

|   |             |             |            |
|---|-------------|-------------|------------|
| C | -4.47225300 | -1.55701000 | 0.24584000 |
|---|-------------|-------------|------------|

## TS1 (v = 154.17 i(cm<sup>-1</sup>))

O 1

|   |             |             |             |
|---|-------------|-------------|-------------|
| C | -5.89759800 | -1.84071800 | -0.24091100 |
| C | -6.59756800 | -0.93216900 | 0.62301300  |
| C | -5.99864300 | 0.19882500  | 1.09800600  |
| C | -4.64877600 | 0.48607200  | 0.72752700  |
| N | -4.01345400 | -0.43984400 | -0.12133000 |
| C | -4.61416000 | -1.57852300 | -0.59910500 |
| N | -3.86930800 | 1.49777100  | 1.04757600  |
| C | -2.68860400 | 1.24172000  | 0.39618800  |
| C | -2.74325600 | 0.04840400  | -0.33646900 |
| C | -1.45573100 | 1.92973800  | 0.32414400  |
| N | -0.48085200 | 1.41565600  | -0.40479400 |
| C | -0.67180200 | 0.24332600  | -1.07421600 |
| N | -1.78329800 | -0.48777600 | -1.07815000 |
| C | -1.24066300 | 3.21766000  | 1.05501400  |

|   |             |             |             |
|---|-------------|-------------|-------------|
| N | 0.41458500  | -0.15347300 | -1.79636600 |
| N | 0.50997200  | -1.42685100 | -2.33593300 |
| H | -6.38586800 | -2.73954300 | -0.61328200 |
| H | -7.62831600 | -1.15607100 | 0.90040100  |
| H | -6.51206500 | 0.90087800  | 1.75360600  |
| H | -3.99825500 | -2.20206900 | -1.24716300 |
| H | -1.95231100 | 3.97586500  | 0.69669200  |
| H | -1.43069700 | 3.07980700  | 2.12904400  |
| H | -0.21660300 | 3.57495500  | 0.90250900  |
| H | 0.72628100  | -1.36237700 | -3.32930000 |
| H | 1.27844200  | -1.92048100 | -1.87930900 |
| H | 1.25677500  | 0.40100500  | -1.65202700 |
| C | 3.66107300  | -0.56707000 | -0.60862500 |
| H | 4.31470900  | -1.07572800 | -1.33234500 |
| O | 2.69561100  | -1.37473700 | -0.17453700 |
| O | 3.22852800  | 0.65155000  | -0.95822600 |
| O | 4.77987700  | -0.27724200 | 0.71873300  |
| C | 5.34652300  | -1.49852400 | 1.09459300  |
| H | 4.57204100  | -2.20568900 | 1.45499600  |
| H | 5.84551200  | -1.99415000 | 0.23568800  |
| C | 4.21901500  | 1.57101500  | -1.43808900 |
| H | 3.81173200  | 2.00490800  | -2.36115000 |
| H | 5.13288500  | 1.01293500  | -1.68965300 |
| C | 1.88595600  | -0.88811900 | 0.91233700  |
| H | 1.49934900  | 0.10897000  | 0.65854400  |
| H | 2.53872100  | -0.79523400 | 1.79225100  |
| C | 6.36434300  | -1.25628600 | 2.19552700  |
| H | 5.87947400  | -0.79290100 | 3.06670700  |
| H | 6.82902900  | -2.19955900 | 2.51526700  |
| H | 7.15401400  | -0.57845800 | 1.84143600  |
| C | 4.49391700  | 2.63538600  | -0.39923400 |
| H | 4.89883100  | 2.16633700  | 0.50543700  |
| H | 5.21939400  | 3.36155200  | -0.79117200 |
| H | 3.56802100  | 3.17121900  | -0.14769900 |
| C | 0.76651400  | -1.87732900 | 1.12988400  |
| H | 0.12539500  | -1.53360100 | 1.95322100  |
| H | 0.14831100  | -1.97063000 | 0.22518300  |
| H | 1.16632900  | -2.86733900 | 1.38984600  |

**TS2 (v = 241.14 i(cm<sup>-1</sup>))**

|     |            |             |             |
|-----|------------|-------------|-------------|
| 0 1 |            |             |             |
| C   | 2.87323100 | -3.18395400 | 0.00058000  |
| C   | 4.17714900 | -2.75797900 | 0.42286900  |
| C   | 4.47787100 | -1.43475000 | 0.57269300  |
| C   | 3.47567700 | -0.45420500 | 0.30095000  |
| N   | 2.21822600 | -0.92966100 | -0.11326900 |
| C   | 1.91237400 | -2.26042400 | -0.26075500 |
| N   | 3.52390200 | 0.86101000  | 0.36969300  |
| C   | 2.27161100 | 1.27118100  | -0.00570100 |
| C   | 1.43767000 | 0.18677400  | -0.31107200 |

|   |             |             |             |
|---|-------------|-------------|-------------|
| C | 1.68336700  | 2.54727800  | -0.16613100 |
| N | 0.41822900  | 2.62138000  | -0.54556600 |
| C | -0.27900900 | 1.48472900  | -0.77540300 |
| N | 0.17319700  | 0.24209000  | -0.71078700 |
| C | 2.46244500  | 3.79934000  | 0.08268700  |
| N | -1.60033500 | 1.69018500  | -1.11822700 |
| N | -2.40150100 | 0.62748500  | -1.45776700 |
| H | 2.64551300  | -4.24244800 | -0.11158100 |
| H | 4.93830100  | -3.51204000 | 0.62605000  |
| H | 5.46008200  | -1.09070100 | 0.89375300  |
| H | 0.89379400  | -2.48036400 | -0.58068900 |
| H | 2.82585600  | 3.81684600  | 1.12042400  |
| H | 3.34746800  | 3.82895200  | -0.56922500 |
| H | 1.83595700  | 4.67800000  | -0.10363800 |
| H | -1.90299700 | -0.13382700 | -1.92008700 |
| H | -1.79359000 | 2.56653900  | -1.59324200 |
| C | -3.26672800 | 0.19062900  | -0.46740900 |
| H | -3.80950900 | 1.00508700  | 0.03878300  |
| O | -2.37215900 | -0.41777800 | 0.95866600  |
| O | -3.97406600 | -0.84971400 | -0.90020200 |
| C | -2.55526100 | 0.37248500  | 2.08975800  |
| H | -2.51382600 | -0.28758500 | 2.97781600  |
| H | -3.56958400 | 0.83040000  | 2.11650800  |
| C | -1.51532500 | 1.47781400  | 2.24110500  |
| H | -1.62747900 | 2.23025200  | 1.44790200  |
| H | -1.60942200 | 1.98049500  | 3.21555400  |
| H | -0.50216000 | 1.05242100  | 2.16268400  |
| C | -4.92941800 | -1.39714600 | 0.01334000  |
| H | -5.87647800 | -1.47568300 | -0.53853200 |
| H | -5.07519000 | -0.69624100 | 0.84882600  |
| C | -4.46667800 | -2.74958500 | 0.50943300  |
| H | -5.21489100 | -3.17783000 | 1.19067200  |
| H | -4.32975700 | -3.44065400 | -0.33374400 |
| H | -3.51271200 | -2.63044500 | 1.03699400  |

**TS3 (v = 332.94 i(cm<sup>-1</sup>))**

|     |             |             |             |
|-----|-------------|-------------|-------------|
| 0 1 |             |             |             |
| C   | -2.95956100 | -2.10421300 | -0.71349900 |
| C   | -4.04581000 | -1.24588100 | -0.33033300 |
| C   | -3.82690500 | 0.05661100  | 0.01314300  |
| C   | -2.49731200 | 0.57684000  | -0.00149700 |
| N   | -1.46492900 | -0.31404400 | -0.37903400 |
| C   | -1.68970100 | -1.62471100 | -0.73467800 |
| N   | -2.04042400 | 1.77498900  | 0.28400800  |
| C   | -0.68446200 | 1.68733200  | 0.09256700  |
| C   | -0.29932000 | 0.40783200  | -0.31475600 |
| C   | 0.37637500  | 2.62090000  | 0.27813200  |
| N   | 1.61226100  | 2.26902600  | 0.02319900  |
| C   | 1.89653600  | 0.99218500  | -0.41421700 |
| N   | 0.95365700  | 0.01192700  | -0.53850100 |



|   |             |             |             |
|---|-------------|-------------|-------------|
| C | 0.08336600  | 4.00426100  | 0.77139900  |
| N | 3.16486600  | 0.71906700  | -0.71108500 |
| N | 3.18660600  | -0.57763600 | -1.26296800 |
| H | -3.14377600 | -3.13985200 | -0.99380600 |
| H | -5.05946300 | -1.64733500 | -0.31895700 |
| H | -4.63498000 | 0.72712400  | 0.30318800  |
| H | -0.81341200 | -2.20300300 | -1.02694200 |
| H | -0.62112300 | 4.50605300  | 0.09227400  |
| H | -0.39996200 | 3.95723000  | 1.75824000  |
| H | 1.00947700  | 4.58486200  | 0.84009900  |
| H | 3.18625600  | -0.59325300 | -2.28237200 |
| C | 2.37816000  | -1.47513100 | -0.71378300 |
| H | 1.95177800  | -2.25443900 | -1.35743900 |
| O | 2.48445900  | -1.71634000 | 0.56225600  |
| C | 1.61891300  | -2.69657500 | 1.15817300  |
| H | 2.28186300  | -3.40675000 | 1.66817400  |
| H | 1.08578100  | -3.23845600 | 0.36226700  |
| C | 0.66819600  | -2.04527000 | 2.13762400  |
| H | 0.09492800  | -2.82623200 | 2.65505500  |
| H | 1.22913700  | -1.47248900 | 2.88798200  |
| H | -0.03728400 | -1.37111700 | 1.63520500  |

|   |             |             |             |
|---|-------------|-------------|-------------|
| O | -2.22414000 | -0.13520000 | 0.58915200  |
| C | -3.57041900 | 0.14860100  | 0.42186600  |
| H | -4.19240800 | -0.77418600 | 0.42064800  |
| H | -3.77131900 | 0.64493700  | -0.55797500 |
| C | -4.05692100 | 1.06741200  | 1.53342800  |
| H | -5.12687700 | 1.29682900  | 1.42458900  |
| H | -3.89765300 | 0.59188300  | 2.51209900  |
| H | -3.49139600 | 2.01082100  | 1.51772900  |
| H | -2.82069700 | -2.81467900 | -1.09614300 |

## Route 2

H:

(2)

0 1

|   |             |             |             |
|---|-------------|-------------|-------------|
| C | 3.53037200  | -1.62242800 | 0.00233100  |
| C | 4.18005900  | -0.34165200 | 0.00024100  |
| C | 3.46147300  | 0.81850900  | -0.00172200 |
| C | 2.03364600  | 0.75994400  | -0.00158400 |
| N | 1.45154500  | -0.52278700 | 0.00030100  |
| C | 2.17405900  | -1.69097400 | 0.00225200  |
| N | 1.13857000  | 1.72406500  | -0.00295700 |
| C | -0.07033600 | 1.07199400  | -0.00211500 |
| C | 0.08801300  | -0.32203500 | -0.00032100 |
| C | -1.40822100 | 1.51888300  | -0.00235300 |
| N | -2.38829000 | 0.62829200  | -0.00273000 |
| C | -2.09631800 | -0.69344200 | -0.00098200 |
| N | -0.87114400 | -1.23262300 | 0.00070800  |
| C | -1.73537300 | 2.97969800  | 0.00430600  |
| N | -3.12412900 | -1.58913700 | -0.00104400 |
| N | -4.45537700 | -1.22203700 | 0.00031000  |
| H | 4.11525300  | -2.54049300 | 0.00392200  |
| H | 5.26986000  | -0.30282700 | 0.00019500  |
| H | 3.93508600  | 1.79929700  | -0.00341300 |
| H | 1.58771900  | -2.60981600 | 0.00369100  |
| H | -1.36488400 | 3.44299000  | 0.93084900  |
| H | -1.23275500 | 3.48654700  | -0.83181000 |
| H | -2.81844200 | 3.12475400  | -0.06826100 |
| H | -4.92200000 | -1.60218600 | -0.82195100 |
| H | -4.92035300 | -1.60218400 | 0.82351100  |
| H | -2.85194800 | -2.56747200 | 0.00083800  |

ln1

0 1

|   |            |             |             |
|---|------------|-------------|-------------|
| C | 6.54267400 | -2.28345800 | -0.68863000 |
|---|------------|-------------|-------------|

## TS4 ( $\nu = 262.45 \text{ i}(\text{cm}^{-1})$ )

0 1

|   |             |             |             |
|---|-------------|-------------|-------------|
| C | -0.26753200 | 3.44553200  | -0.62863300 |
| C | 1.01353700  | 3.95962400  | -0.24393100 |
| C | 2.03103600  | 3.11618300  | 0.09745900  |
| C | 1.81928100  | 1.70856900  | 0.05899800  |
| N | 0.54693300  | 1.25098300  | -0.36270600 |
| C | -0.49044500 | 2.10710400  | -0.67968200 |
| N | 2.62611700  | 0.71295000  | 0.36581900  |
| C | 1.89403100  | -0.41615900 | 0.15148700  |
| C | 0.62448900  | -0.10302100 | -0.30529900 |
| C | 2.22823000  | -1.80750000 | 0.37750400  |
| N | 1.34079800  | -2.74274900 | 0.19547800  |
| C | 0.09153900  | -2.41097600 | -0.24296300 |
| N | -0.26283800 | -1.09600800 | -0.61218300 |
| C | 3.60207600  | -2.15363900 | 0.84916400  |
| N | -0.91589300 | -3.21225000 | -0.39131500 |
| N | -1.91927700 | -2.41419100 | -0.87131800 |
| H | -1.08317700 | 4.12272000  | -0.87662800 |
| H | 1.16681900  | 5.03842100  | -0.21629600 |
| H | 3.01117700  | 3.47408900  | 0.40965000  |
| H | -1.44627400 | 1.64616600  | -0.91771600 |
| H | 3.82531900  | -1.60911800 | 1.77799200  |
| H | 3.68604800  | -3.23241900 | 1.01509700  |
| H | 4.34298000  | -1.83011100 | 0.10335700  |
| C | -1.62544300 | -1.08516600 | -0.86849300 |
| H | -2.08104300 | -0.43428700 | -1.62147800 |

|   |             |             |             |
|---|-------------|-------------|-------------|
| C | 7.49090100  | -1.32342000 | -0.19644600 |
| C | 7.09173500  | -0.09799900 | 0.25254400  |
| C | 5.70279100  | 0.23850800  | 0.23378000  |
| N | 4.81975400  | -0.74123300 | -0.26052200 |
| C | 5.22055000  | -1.97472300 | -0.71216600 |
| N | 5.08388900  | 1.33657900  | 0.61043100  |
| C | 3.75578100  | 1.08589700  | 0.36375200  |
| C | 3.55734900  | -0.19352400 | -0.17663100 |
| C | 2.57988300  | 1.84369900  | 0.54403500  |
| N | 1.41253200  | 1.31896500  | 0.20479700  |
| C | 1.35989200  | 0.06668700  | -0.30826100 |
| N | 2.40566400  | -0.74222400 | -0.52449500 |
| C | 2.63277100  | 3.22808800  | 1.11157500  |
| N | 0.14678100  | -0.45006600 | -0.64712000 |
| N | -1.04503500 | 0.23184900  | -0.49820400 |
| H | 6.87358900  | -3.25800600 | -1.04323100 |
| H | 8.54958700  | -1.58520100 | -0.18348400 |
| H | 7.79457900  | 0.64309300  | 0.63099100  |
| H | 4.42540500  | -2.63206000 | -1.06395400 |
| H | 3.10735300  | 3.21224900  | 2.10343500  |
| H | 3.24869600  | 3.87615800  | 0.47106900  |
| H | 1.62244200  | 3.64303400  | 1.19205800  |
| H | -1.49247700 | 0.38807700  | -1.40117300 |
| H | -1.70481600 | -0.31190700 | 0.06035300  |
| H | 0.16800000  | -1.38278100 | -1.04839400 |
| C | -4.41142100 | -0.54395900 | -0.48613600 |
| H | -4.38497700 | -1.20025900 | -1.37966000 |
| O | -3.87926700 | 0.66321500  | -0.88571500 |
| O | -3.63511300 | -1.06130200 | 0.53635800  |
| O | -5.71535000 | -0.42793900 | -0.02397800 |
| C | -6.65524800 | -0.09173600 | -1.03076700 |
| H | -6.39913300 | 0.89013300  | -1.46404300 |
| H | -6.60168600 | -0.83606200 | -1.84590100 |
| C | -3.98108500 | -2.37265200 | 0.97025900  |
| H | -3.03301000 | -2.90934300 | 1.11892300  |
| H | -4.53474000 | -2.89074600 | 0.16965200  |
| C | -3.90570700 | 1.70183400  | 0.09215400  |
| H | -3.42119800 | 1.34787500  | 1.01538600  |
| H | -4.95291300 | 1.94664800  | 0.33327400  |
| C | -8.03307800 | -0.06763000 | -0.41027300 |
| H | -8.07877500 | 0.68069000  | 0.39300700  |
| H | -8.78713500 | 0.18624400  | -1.16682400 |
| H | -8.27957800 | -1.05075200 | 0.01403400  |
| C | -4.78527200 | -2.34657600 | 2.25525100  |
| H | -5.74378200 | -1.83691700 | 2.09684600  |
| H | -4.97729100 | -3.37179900 | 2.60182100  |
| H | -4.22830900 | -1.81621300 | 3.04046400  |
| C | -3.17971900 | 2.89815200  | -0.47928000 |
| H | -3.22263000 | 3.73830800  | 0.22675800  |
| H | -2.12730100 | 2.64369700  | -0.66327700 |
| H | -3.64394700 | 3.21383000  | -1.42421800 |

## In2

0 1

|   |             |             |             |
|---|-------------|-------------|-------------|
| C | -4.97886400 | -2.03803900 | -0.21035900 |
| C | -5.77482200 | -1.04925900 | 0.46067700  |
| C | -5.26546800 | 0.17684000  | 0.77676900  |
| C | -3.91303300 | 0.48466500  | 0.43203500  |
| N | -3.18169100 | -0.52235300 | -0.22571200 |
| C | -3.69250600 | -1.75714600 | -0.54260500 |
| N | -3.20909200 | 1.57955300  | 0.62733800  |
| C | -1.97834300 | 1.29885700  | 0.08816400  |
| C | -1.92750400 | 0.00328400  | -0.44852600 |
| C | -0.78675400 | 2.04317000  | -0.03719000 |
| N | 0.26487400  | 1.48494700  | -0.61938000 |
| C | 0.18316200  | 0.21835100  | -1.07605100 |
| N | -0.88876800 | -0.57566800 | -1.02877700 |
| C | -0.69676000 | 3.45249300  | 0.45874300  |
| N | 1.28512600  | -0.33343400 | -1.68530500 |
| N | 2.54348000  | 0.20575700  | -1.55997300 |
| H | -5.39658800 | -3.01290100 | -0.45532800 |
| H | -6.80652000 | -1.28940700 | 0.72048900  |
| H | -5.85172800 | 0.94023400  | 1.28642500  |
| H | -3.00874800 | -2.43722200 | -1.05061200 |
| H | -1.32468400 | 4.10797200  | -0.16358800 |
| H | -1.07777200 | 3.52161400  | 1.48700200  |
| H | 0.34013900  | 3.80266700  | 0.41691200  |
| H | 3.02975000  | 0.21355300  | -2.45368600 |
| H | 1.19267500  | -1.32504500 | -1.89883800 |
| C | 3.35330400  | -0.44954500 | -0.55955500 |
| H | 3.34262400  | -1.56025600 | -0.66632900 |
| O | 2.86153100  | -0.12440100 | 0.69888900  |
| O | 4.63105500  | 0.03100100  | -0.77539800 |
| C | 2.59800700  | -1.18656700 | 1.60202500  |
| H | 2.75952100  | -0.77737300 | 2.60968700  |
| H | 3.33185600  | -1.99930100 | 1.46086300  |
| C | 1.18136600  | -1.70939900 | 1.46377100  |
| H | 1.01746900  | -2.15670000 | 0.47264800  |
| H | 0.97910100  | -2.47386900 | 2.22708900  |
| H | 0.46028000  | -0.88781500 | 1.58770900  |
| C | 5.65727900  | -0.58118000 | -0.01029900 |
| H | 6.55424300  | -0.58013900 | -0.64574500 |
| H | 5.39741700  | -1.63696100 | 0.18355300  |
| C | 5.93747100  | 0.15756700  | 1.28645700  |
| H | 6.79594400  | -0.29777200 | 1.79968400  |
| H | 6.17788300  | 1.20880100  | 1.07456800  |
| H | 5.06973000  | 0.13093900  | 1.95789800  |

## In3

0 1

|   |             |             |            |
|---|-------------|-------------|------------|
| C | -4.53427200 | -2.34818200 | 0.00016200 |
|---|-------------|-------------|------------|

|   |             |             |             |
|---|-------------|-------------|-------------|
| C | -5.49847500 | -1.29150600 | 0.12627800  |
| C | -5.11479100 | 0.01704100  | 0.18286700  |
| C | -3.72520700 | 0.34382400  | 0.11550500  |
| N | -2.82654800 | -0.73282400 | -0.00796500 |
| C | -3.21116300 | -2.04994500 | -0.06516000 |
| N | -3.11774700 | 1.51116900  | 0.15049100  |
| C | -1.78295300 | 1.20903500  | 0.04813700  |
| C | -1.56819200 | -0.17449400 | -0.05239600 |
| C | -0.61377600 | 1.99842700  | 0.02836600  |
| N | 0.56546100  | 1.40267400  | -0.07972200 |
| C | 0.62668200  | 0.05750500  | -0.17133700 |
| N | -0.40370300 | -0.79219000 | -0.16307100 |
| C | -0.68410100 | 3.49029900  | 0.11798300  |
| N | 1.85761000  | -0.53089200 | -0.28682800 |
| N | 3.01088900  | 0.17484900  | -0.28814000 |
| H | -4.85356300 | -3.38789200 | -0.04386600 |
| H | -6.55766000 | -1.54628300 | 0.17706600  |
| H | -5.83072300 | 0.83218900  | 0.27847800  |
| H | -2.40438600 | -2.77637800 | -0.16166800 |
| H | -1.15608000 | 3.89736800  | -0.78884900 |
| H | -1.30856600 | 3.79232400  | 0.97031000  |
| H | 0.32161000  | 3.91139300  | 0.22107200  |
| H | 1.86291900  | -1.54751700 | -0.34371600 |
| C | 4.08939200  | -0.48467200 | -0.37795000 |
| H | 4.13667900  | -1.58590400 | -0.44130900 |
| O | 5.25801900  | 0.16490200  | -0.43143600 |
| C | 6.42517700  | -0.63773400 | -0.26765600 |
| H | 7.25122900  | -0.02984400 | -0.65582100 |
| H | 6.34271500  | -1.53680100 | -0.90058900 |
| C | 6.65490000  | -1.00711000 | 1.18387900  |
| H | 7.58782600  | -1.57821100 | 1.28290500  |
| H | 6.73051200  | -0.10181500 | 1.80161200  |
| H | 5.83227200  | -1.62626300 | 1.57044600  |

|   |             |             |             |
|---|-------------|-------------|-------------|
| N | -1.12497000 | 1.56887300  | -1.28332300 |
| N | -1.56893000 | 2.88962400  | -1.05082100 |
| H | 3.43856000  | -3.79370800 | 0.94970600  |
| H | 5.03956600  | -2.84374800 | 2.64714600  |
| H | 4.90058400  | -0.45371100 | 3.31554000  |
| H | 1.69121600  | -2.26832400 | -0.06179700 |
| H | 2.37031100  | 3.89276900  | 2.42848900  |
| H | 1.77769100  | 4.73281800  | 0.95688100  |
| H | 0.65323000  | 4.38114000  | 2.28938100  |
| H | -1.88143800 | 3.32052800  | -1.91646600 |
| C | -0.53192500 | 3.65749800  | -0.38854400 |
| O | 0.34715500  | 4.34931100  | -1.23035300 |
| C | 0.06908300  | 5.73397400  | -1.39013700 |
| H | 0.94314800  | 6.15036600  | -1.90675000 |
| H | 0.00953300  | 6.21329600  | -0.39609100 |
| C | -1.19794000 | 5.99901700  | -2.18335900 |
| H | -1.31938200 | 7.07801500  | -2.34965200 |
| H | -1.14975700 | 5.50007200  | -3.16197700 |
| H | -2.09187300 | 5.64426400  | -1.64755600 |
| H | -0.95183400 | 4.35883300  | 0.35343100  |

## Product

0 1

|   |             |             |             |
|---|-------------|-------------|-------------|
| C | 3.32092600  | -2.82940000 | 1.42577300  |
| C | 3.97102700  | -2.42429800 | 2.64126300  |
| C | 3.87484300  | -1.14885600 | 3.11540000  |
| C | 3.10742000  | -0.18891700 | 2.38378000  |
| N | 2.49369500  | -0.64294200 | 1.20469400  |
| C | 2.58976800  | -1.92649100 | 0.72537800  |
| N | 2.87780400  | 1.07889900  | 2.63892200  |
| C | 2.08311600  | 1.50976900  | 1.60452500  |
| C | 1.81820600  | 0.43953100  | 0.67211900  |
| C | 1.53578300  | 2.74173000  | 1.33879400  |
| N | 0.78593300  | 2.78071400  | 0.18319400  |
| C | 0.58086000  | 1.68040900  | -0.66594900 |
| N | 1.11287300  | 0.46980400  | -0.41757300 |
| C | 1.68661600  | 3.96801100  | 2.16213100  |
| N | -0.17987500 | 2.04863400  | -1.68010800 |
| N | -0.46845500 | 3.35095600  | -1.50605000 |
| H | 3.40920700  | -3.85110600 | 1.06199900  |
| H | 4.55519700  | -3.16041300 | 3.19486400  |
| H | 4.36152500  | -0.82595400 | 4.03424400  |
| H | 2.05809900  | -2.12611100 | -0.20503600 |
| H | 2.31162300  | 3.74254700  | 3.03236100  |
| H | 2.15637900  | 4.77154600  | 1.57529200  |
| H | 0.70435500  | 4.32727100  | 2.50387800  |
| H | -1.45564400 | 4.16697100  | -2.85304400 |
| C | 0.09389900  | 3.79990100  | -0.41261000 |
| O | -1.80896100 | 4.67300700  | -3.61257300 |
| C | -1.18182200 | 5.92868100  | -3.57065300 |

## In4

0 1

|   |             |             |             |
|---|-------------|-------------|-------------|
| C | 3.37261600  | -2.74620800 | 1.23720200  |
| C | 4.28292000  | -2.19273200 | 2.20732100  |
| C | 4.21915800  | -0.88541300 | 2.58392700  |
| C | 3.22284700  | -0.03364100 | 2.00167100  |
| N | 2.36131600  | -0.63264100 | 1.05692500  |
| C | 2.42631400  | -1.95281500 | 0.67891000  |
| N | 2.97145100  | 1.23307100  | 2.19892700  |
| C | 1.90513000  | 1.51572400  | 1.36534400  |
| C | 1.49353700  | 0.35269800  | 0.62621100  |
| C | 1.21926300  | 2.68449400  | 1.11926300  |
| N | 0.19626300  | 2.57035500  | 0.23295300  |
| C | -0.14255000 | 1.38252700  | -0.47424700 |
| N | 0.54602300  | 0.22575300  | -0.25417700 |
| C | 1.52685600  | 4.00187200  | 1.73923900  |

|   |             |            |             |
|---|-------------|------------|-------------|
| H | -1.34055200 | 6.41429100 | -4.54704900 |
| H | -0.08649600 | 5.82335500 | -3.44687400 |
| C | -1.73488700 | 6.81532500 | -2.46462800 |
| H | -1.25387800 | 7.80414000 | -2.46298000 |
| H | -2.81812800 | 6.95247900 | -2.59484600 |
| H | -1.56988700 | 6.35217100 | -1.47958100 |
| H | 0.03472800  | 4.81112900 | -0.02026200 |

|   |             |             |             |
|---|-------------|-------------|-------------|
| C | 4.71468500  | 3.36839600  | -1.58332100 |
| H | 4.87956000  | 2.81986900  | -2.52187700 |
| H | 4.42932800  | 4.40132700  | -1.82812300 |
| H | 5.66300700  | 3.39003500  | -1.02732200 |
| C | 5.70636000  | -0.92588100 | 0.76295000  |
| H | 5.83772600  | -0.14332600 | 0.00599300  |
| H | 6.60194000  | -0.97814500 | 1.39743700  |
| H | 5.57907000  | -1.89651300 | 0.26359200  |
| C | 0.48485300  | 0.15126100  | -2.18195200 |
| H | 0.36907000  | -0.54470600 | -3.02380200 |
| H | -0.44945800 | 0.15039700  | -1.60153400 |
| H | 0.64563800  | 1.16244000  | -2.58048400 |

### TS1 ( $\nu = 164.92 \text{ i}(\text{cm}^{-1})$ )

|     |             |             |             |
|-----|-------------|-------------|-------------|
| O 1 |             |             |             |
| C   | -4.34719900 | 2.58830300  | 1.59799000  |
| C   | -5.36919900 | 2.45518800  | 0.59726400  |
| C   | -5.32086200 | 1.46229700  | -0.33723600 |
| C   | -4.23285300 | 0.53610600  | -0.32153700 |
| N   | -3.26038500 | 0.71388700  | 0.68204600  |
| C   | -3.30861500 | 1.71341400  | 1.62345200  |
| N   | -3.97421600 | -0.48668900 | -1.10616700 |
| C   | -2.80169400 | -1.00853100 | -0.61707800 |
| C   | -2.33120000 | -0.28739100 | 0.49212300  |
| C   | -1.99250300 | -2.09343400 | -1.00815000 |
| N   | -0.89048400 | -2.36014000 | -0.32242600 |
| C   | -0.55062500 | -1.58569500 | 0.73384800  |
| N   | -1.23163700 | -0.52462500 | 1.18667400  |
| C   | -2.33049900 | -2.92345100 | -2.20693300 |
| N   | 0.57669600  | -1.89975200 | 1.43393300  |
| N   | 1.44910000  | -2.90137800 | 1.05054800  |
| H   | -4.39746700 | 3.38507100  | 2.33792700  |
| H   | -6.19749600 | 3.16449800  | 0.59011700  |
| H   | -6.08494300 | 1.34249400  | -1.10412200 |
| H   | -2.48633200 | 1.73040100  | 2.33877800  |
| H   | -3.41526900 | -2.95421100 | -2.36717900 |
| H   | -1.87219300 | -2.47192300 | -3.10126000 |
| H   | -1.92864800 | -3.93698300 | -2.09411900 |
| H   | 2.35787200  | -2.48472100 | 0.84732500  |
| H   | 1.56414100  | -3.56841000 | 1.81165600  |
| H   | 0.83935900  | -1.23606100 | 2.15655500  |
| C   | 2.79786900  | 0.62066700  | 0.52495900  |
| H   | 2.73589200  | 1.33297500  | 1.36069300  |
| O   | 1.66949700  | 0.58804900  | -0.16941500 |
| O   | 3.30537500  | -0.58397600 | 0.81254000  |
| O   | 4.03593300  | 1.38045400  | -0.46878300 |
| C   | 3.63642800  | 2.68648800  | -0.75907500 |
| H   | 2.67984800  | 2.69858400  | -1.31941300 |
| H   | 3.46006600  | 3.27154500  | 0.16881100  |
| C   | 4.49497100  | -0.60619200 | 1.61154600  |
| H   | 4.32841800  | -1.37440000 | 2.37940700  |
| H   | 4.60656000  | 0.36608400  | 2.11484000  |
| C   | 1.64298900  | -0.27925800 | -1.31377000 |
| H   | 1.51790200  | -1.31864000 | -0.97429700 |
| H   | 2.60816400  | -0.18439600 | -1.83238300 |

### TS2 ( $\nu = 241.91 \text{ i}(\text{cm}^{-1})$ )

|     |             |             |             |
|-----|-------------|-------------|-------------|
| O 1 |             |             |             |
| C   | -5.25202400 | -1.67722800 | 0.04839400  |
| C   | -5.90565300 | -0.48355600 | 0.50562900  |
| C   | -5.22936800 | 0.69605700  | 0.62336600  |
| C   | -3.84254900 | 0.74548300  | 0.28280100  |
| N   | -3.25619800 | -0.45366300 | -0.16223200 |
| C   | -3.93441400 | -1.64222200 | -0.27797900 |
| N   | -2.99062200 | 1.74910900  | 0.31220800  |
| C   | -1.80648000 | 1.20921000  | -0.12105300 |
| C   | -1.93623700 | -0.15706900 | -0.42233700 |
| C   | -0.52726300 | 1.75579900  | -0.34949500 |
| N   | 0.43759100  | 0.95789400  | -0.78853900 |
| C   | 0.18493400  | -0.34862600 | -0.99089300 |
| N   | -0.98445400 | -0.96883000 | -0.85409500 |
| C   | -0.24617600 | 3.20743800  | -0.12418600 |
| N   | 1.24007600  | -1.14088800 | -1.39809100 |
| N   | 2.48602300  | -0.60214200 | -1.61210100 |
| H   | -5.80219700 | -2.61242800 | -0.03839600 |
| H   | -6.96450500 | -0.52717800 | 0.76307000  |
| H   | -5.70647200 | 1.61184300  | 0.96965100  |
| H   | -3.34801200 | -2.49036000 | -0.63126600 |
| H   | -0.88880400 | 3.82312400  | -0.77032400 |
| H   | -0.47949800 | 3.47941700  | 0.91545100  |
| H   | 0.80600600  | 3.42572000  | -0.33550700 |
| H   | 2.45845800  | 0.36122400  | -1.94795900 |
| H   | 0.99556300  | -1.94343200 | -1.96924900 |
| C   | 3.39433900  | -0.78687800 | -0.58148300 |
| H   | 3.42354800  | -1.81815100 | -0.19375900 |
| O   | 2.83713400  | 0.01474600  | 0.91885900  |
| O   | 4.55374600  | -0.20584900 | -0.87865400 |
| C   | 2.57286800  | -0.88607100 | 1.94630400  |
| H   | 2.82136900  | -0.39323100 | 2.90634400  |
| H   | 3.23627600  | -1.77851100 | 1.89862300  |
| C   | 1.12296100  | -1.35563300 | 1.98575600  |
| H   | 0.88387400  | -1.95739000 | 1.09734200  |

|   |            |             |             |
|---|------------|-------------|-------------|
| H | 0.92361000 | -1.96074400 | 2.88310100  |
| H | 0.44775900 | -0.48500300 | 1.99458900  |
| C | 5.59563500 | -0.32189700 | 0.09442800  |
| H | 6.49267900 | -0.64584800 | -0.45147200 |
| H | 5.33130900 | -1.10742500 | 0.81844200  |
| C | 5.82259900 | 1.00521800  | 0.78527900  |
| H | 6.64517600 | 0.91775700  | 1.50851100  |
| H | 6.08784800 | 1.77731100  | 0.04967200  |
| H | 4.90304300 | 1.30163600  | 1.30426200  |

|   |             |             |             |
|---|-------------|-------------|-------------|
| C | -4.85085300 | -1.03647400 | 0.56035900  |
| C | -5.22057600 | 0.35143400  | 0.46226200  |
| C | -4.30124300 | 1.32051400  | 0.19523000  |
| C | -2.92905600 | 0.95253800  | 0.00658500  |
| N | -2.62721800 | -0.42007400 | 0.11618500  |
| C | -3.55605400 | -1.39784900 | 0.38497800  |
| N | -1.88552900 | 1.69525400  | -0.25757700 |
| C | -0.83071400 | 0.80874900  | -0.33544300 |
| C | -1.26858900 | -0.54565800 | -0.09989300 |
| C | 0.50650800  | 1.00915600  | -0.57557400 |
| N | 1.25286300  | -0.13947900 | -0.59414500 |
| C | 0.74537200  | -1.43920200 | -0.32663100 |
| N | -0.57180200 | -1.64125400 | -0.07662900 |
| C | 1.16890700  | 2.32010600  | -0.79249000 |
| N | 1.69160600  | -2.32417600 | -0.37096000 |
| N | 2.81324400  | -1.60176300 | -0.71192700 |
| H | -5.60031300 | -1.79656400 | 0.77180900  |
| H | -6.26612500 | 0.62675000  | 0.60627500  |
| H | -4.56490300 | 2.37408900  | 0.11764600  |
| H | -3.16874700 | -2.41547200 | 0.43788700  |
| H | 0.42938700  | 3.12315800  | -0.71205700 |
| H | 1.95807800  | 2.43938000  | -0.03593600 |
| H | 1.63941000  | 2.35439600  | -1.78647200 |
| H | 3.70776900  | -2.07034700 | -0.75943600 |
| C | 2.64433300  | -0.25445300 | -0.65654100 |
| O | 3.13954400  | 0.51109300  | 0.91861200  |
| C | 4.40970400  | 1.05937400  | 0.81896800  |
| H | 4.51288800  | 1.85906100  | 1.57819500  |
| H | 4.56208400  | 1.57111900  | -0.16136100 |
| C | 5.52950800  | 0.04128500  | 1.01717100  |
| H | 6.51738100  | 0.52545800  | 1.02558100  |
| H | 5.38904400  | -0.48802700 | 1.97101600  |
| H | 5.53126100  | -0.70873700 | 0.21151100  |
| H | 3.24080900  | 0.40030200  | -1.30206700 |

### TS3 ( $\nu = 315.01 \text{ i}(\text{cm}^{-1})$ )

|     |             |             |             |
|-----|-------------|-------------|-------------|
| O 1 |             |             |             |
| C   | 4.56237700  | -1.09417500 | 0.74103400  |
| C   | 5.01595800  | 0.22941100  | 0.40743600  |
| C   | 4.15681400  | 1.17617500  | -0.06710400 |
| C   | 2.77389000  | 0.84952300  | -0.23688600 |
| N   | 2.38731200  | -0.46289800 | 0.10651800  |
| C   | 3.25317100  | -1.41647600 | 0.58365300  |
| N   | 1.77213700  | 1.57803000  | -0.66830500 |
| C   | 0.68338300  | 0.73572600  | -0.61537100 |
| C   | 1.02914000  | -0.54606000 | -0.13358400 |
| C   | -0.67753500 | 0.91826600  | -0.90383800 |
| N   | -1.48655200 | -0.11338800 | -0.70923800 |
| C   | -1.04535200 | -1.35627500 | -0.27902300 |
| N   | 0.25225800  | -1.59109800 | 0.04313400  |
| C   | -1.22350300 | 2.23345200  | -1.36425500 |
| N   | -1.93413000 | -2.34347200 | -0.17014100 |
| N   | -3.15914700 | -1.88368800 | -0.69933100 |
| H   | 5.25929100  | -1.83993600 | 1.11927800  |
| H   | 6.07078700  | 0.47344500  | 0.53896900  |
| H   | 4.48151500  | 2.18324200  | -0.32577500 |
| H   | 2.80907500  | -2.38726700 | 0.80481300  |
| H   | -1.53110600 | 2.83331200  | -0.49266500 |
| H   | -0.44835600 | 2.79809900  | -1.89631800 |
| H   | -2.09554400 | 2.08827500  | -2.01384400 |
| H   | -3.32420400 | -2.16079300 | -1.66617500 |
| C   | -3.46678100 | -0.61658000 | -0.44638700 |
| H   | -4.03344600 | -0.05219800 | -1.19702700 |
| O   | -3.53635700 | -0.23505300 | 0.80307700  |
| C   | -3.72493200 | 1.16496600  | 1.06750300  |
| H   | -4.74005700 | 1.28338900  | 1.47027000  |
| H   | -3.65939300 | 1.72166400  | 0.12122900  |
| C   | -2.68019300 | 1.62543700  | 2.05771600  |
| H   | -2.82946100 | 2.68977700  | 2.28314900  |
| H   | -2.76236900 | 1.05670000  | 2.99337800  |
| H   | -1.66763600 | 1.48798100  | 1.65227200  |

### TS4 ( $\nu = 303.31 \text{ i}(\text{cm}^{-1})$ )

O 1

### Route 1

Me:

### Triethyl orthoacetate

|     |             |             |             |
|-----|-------------|-------------|-------------|
| O 1 |             |             |             |
| C   | -0.11295300 | -0.02194700 | -1.12263400 |
| O   | 1.27210200  | -0.05441800 | -0.98688900 |
| O   | -0.58959200 | -1.23476100 | -0.63093100 |
| O   | -0.57319500 | 0.97153600  | -0.26437600 |
| C   | -0.27135200 | 2.31238000  | -0.61098300 |
| H   | 0.78186400  | 2.38462700  | -0.92717600 |
| H   | -0.90345500 | 2.63808100  | -1.45499100 |
| C   | -1.98741900 | -1.35122100 | -0.40461200 |

|   |             |             |             |
|---|-------------|-------------|-------------|
| H | -2.31737300 | -2.29113400 | -0.87349200 |
| H | -2.52749800 | -0.52761300 | -0.89438700 |
| C | 1.98202800  | -0.96074400 | -1.81350400 |
| H | 2.04772000  | -0.56674200 | -2.84251100 |
| H | 1.44905900  | -1.92448500 | -1.85149600 |
| C | -0.52717200 | 3.17805100  | 0.60285600  |
| H | 0.11976800  | 2.86971400  | 1.43547600  |
| H | -0.32361800 | 4.23190700  | 0.37082400  |
| H | -1.57439500 | 3.08814400  | 0.92391600  |
| C | -2.28522000 | -1.36050500 | 1.08229800  |
| H | -1.97926300 | -0.40498300 | 1.52838700  |
| H | -3.35903800 | -1.51183100 | 1.26149700  |
| H | -1.73301700 | -2.17209400 | 1.57692100  |
| C | 3.36657400  | -1.13949800 | -1.22952200 |
| H | 3.96327200  | -1.81483200 | -1.85702000 |
| H | 3.88421200  | -0.17188900 | -1.16901700 |
| H | 3.30186700  | -1.56268200 | -0.21779300 |
| C | -0.54382500 | 0.20790600  | -2.57249400 |
| H | 0.00116000  | 1.05497500  | -3.00915200 |
| H | -1.61967400 | 0.41875100  | -2.62186700 |
| H | -0.33531600 | -0.69030700 | -3.16689800 |

## In1

O 1

|   |             |             |             |
|---|-------------|-------------|-------------|
| C | -5.98992500 | -1.87677600 | 0.11750500  |
| C | -6.70763700 | -0.79610900 | 0.73439500  |
| C | -6.11926700 | 0.41726700  | 0.94429300  |
| C | -4.76265300 | 0.61826300  | 0.54292100  |
| N | -4.10903700 | -0.47594000 | -0.05583000 |
| C | -4.69997800 | -1.69766100 | -0.26751000 |
| N | -3.99156700 | 1.67984200  | 0.63748900  |
| C | -2.79467400 | 1.28699400  | 0.09020300  |
| C | -2.83298200 | -0.04500300 | -0.34875800 |
| C | -1.56209000 | 1.94457100  | -0.11375400 |
| N | -0.57066900 | 1.28122500  | -0.68340400 |
| C | -0.74067300 | -0.01636200 | -1.06110200 |
| N | -1.85616100 | -0.73313300 | -0.92076000 |
| C | -1.34450900 | 3.36136900  | 0.31961100  |
| N | 0.36171500  | -0.56694500 | -1.64100900 |
| N | 0.47787000  | -1.93924400 | -1.82575700 |
| H | -6.46993500 | -2.84034000 | -0.04424600 |
| H | -7.74284500 | -0.95516600 | 1.03830300  |
| H | -6.64496300 | 1.24909400  | 1.41139800  |
| H | -4.07117400 | -2.45159300 | -0.74112100 |
| H | -2.30082100 | 3.86010700  | 0.51562700  |
| H | -0.74807200 | 3.37531200  | 1.24459200  |
| H | -0.78215900 | 3.90944400  | -0.44702300 |
| H | 0.74281600  | -2.12835000 | -2.79123600 |
| H | 1.23069100  | -2.27766600 | -1.22238100 |
| H | 1.21555800  | -0.01218300 | -1.56549500 |

|   |            |             |             |
|---|------------|-------------|-------------|
| C | 3.64201300 | -0.63735000 | -0.32813300 |
| O | 2.60153700 | -1.34297100 | 0.26487600  |
| O | 3.06426000 | 0.38391300  | -1.09191600 |
| O | 4.44129800 | -0.01076100 | 0.62741700  |
| C | 5.15986100 | -0.85851900 | 1.51021900  |
| H | 4.51221100 | -1.69198100 | 1.83084800  |
| H | 6.03293900 | -1.28973700 | 0.99189800  |
| C | 3.88092300 | 1.47275200  | -1.51132900 |
| H | 3.65673000 | 1.64178800  | -2.57481000 |
| H | 4.94295800 | 1.20060000  | -1.42890300 |
| C | 1.81347300 | -0.62158100 | 1.21011900  |
| H | 1.45642200 | 0.31602700  | 0.75513900  |
| H | 2.43617500 | -0.35891600 | 2.08073500  |
| C | 5.60152400 | -0.03254400 | 2.69815600  |
| H | 4.73045000 | 0.37280300  | 3.23165000  |
| H | 6.18328000 | -0.65021500 | 3.39499600  |
| H | 6.22962500 | 0.80680600  | 2.36914200  |
| C | 3.57635500 | 2.71129000  | -0.69250900 |
| H | 3.82963600 | 2.53522800  | 0.36133600  |
| H | 4.15420600 | 3.57052100  | -1.06098900 |
| H | 2.50645800 | 2.95512600  | -0.76198700 |
| C | 0.65725100 | -1.50575700 | 1.62288700  |
| H | 0.01640700 | -0.97430800 | 2.34012500  |
| H | 0.04602600 | -1.78454600 | 0.75222300  |
| H | 1.02517700 | -2.42529500 | 2.09999200  |
| C | 4.39799900 | -1.61629600 | -1.21037100 |
| H | 3.70563600 | -1.99395700 | -1.97331000 |
| H | 5.23893100 | -1.10939300 | -1.70160100 |
| H | 4.77575100 | -2.46258500 | -0.62409500 |

## In2

O 1

|   |             |             |             |
|---|-------------|-------------|-------------|
| C | -3.50545000 | 3.16174500  | -0.22279300 |
| C | -4.75399800 | 2.63893900  | 0.25619800  |
| C | -4.92549600 | 1.30269900  | 0.47645300  |
| C | -3.84235300 | 0.40590600  | 0.22457800  |
| N | -2.64355800 | 0.97444200  | -0.24456800 |
| C | -2.46861100 | 2.31856400  | -0.46501000 |
| N | -3.76568100 | -0.90191400 | 0.35709100  |
| C | -2.48747700 | -1.21289100 | -0.03249100 |
| C | -1.76417200 | -0.07316500 | -0.41095500 |
| C | -1.77870800 | -2.43148100 | -0.13737700 |
| N | -0.52639400 | -2.40367300 | -0.55749800 |
| C | 0.05916000  | -1.21891300 | -0.87701000 |
| N | -0.50876500 | -0.02030500 | -0.83653200 |
| C | -2.41728900 | -3.73667300 | 0.21933100  |
| N | 1.35880300  | -1.35155000 | -1.28754100 |
| N | 2.19032400  | -0.27385800 | -1.45678300 |
| H | -3.38043400 | 4.22946700  | -0.39365600 |
| H | -5.57693700 | 3.32897800  | 0.44567400  |

|   |             |             |             |
|---|-------------|-------------|-------------|
| H | -5.86374000 | 0.88625100  | 0.84082700  |
| H | -1.48413600 | 2.61532700  | -0.82674200 |
| H | -3.32497900 | -3.89157400 | -0.38156000 |
| H | -1.71546400 | -4.56014000 | 0.04992900  |
| H | -2.72725000 | -3.72792200 | 1.27457100  |
| H | 2.67816800  | -0.31752900 | -2.34955900 |
| H | 1.73166100  | -2.29610900 | -1.23595200 |
| C | 3.14923200  | -0.07245500 | -0.37208600 |
| O | 2.42817600  | 0.38847900  | 0.72923200  |
| O | 3.95337900  | 0.95607000  | -0.87524700 |
| C | 2.43936500  | -0.25349400 | 1.99284000  |
| H | 2.30070200  | 0.55212100  | 2.72836700  |
| H | 3.41953600  | -0.70744200 | 2.20316800  |
| C | 1.32514900  | -1.27537000 | 2.13239700  |
| H | 1.45811700  | -2.11892100 | 1.44039000  |
| H | 1.29853600  | -1.66909500 | 3.15828700  |
| H | 0.35379600  | -0.80685000 | 1.91260300  |
| C | 4.75305100  | 1.65538800  | 0.06529600  |
| H | 5.75720000  | 1.75347800  | -0.37437500 |
| H | 4.85777300  | 1.07352900  | 0.99510600  |
| C | 4.16363400  | 3.02048000  | 0.36446400  |
| H | 4.04745200  | 3.59419100  | -0.56590000 |
| H | 3.17648300  | 2.90627800  | 0.83171800  |
| H | 4.81873100  | 3.58643400  | 1.04175300  |
| C | 4.00449100  | -1.31128000 | -0.09817100 |
| H | 4.81297100  | -1.09474400 | 0.61159900  |
| H | 3.41363200  | -2.14691400 | 0.29871000  |
| H | 4.45946000  | -1.61519700 | -1.05000100 |

### In3

|     |             |             |             |
|-----|-------------|-------------|-------------|
| O 1 |             |             |             |
| C   | 3.34594700  | -3.03037000 | 0.19242600  |
| C   | 4.64036000  | -2.41189100 | 0.13504900  |
| C   | 4.77549400  | -1.05699000 | 0.03802500  |
| C   | 3.60648300  | -0.23747600 | -0.00725200 |
| N   | 2.36525400  | -0.89848800 | 0.05049500  |
| C   | 2.22736200  | -2.26145900 | 0.14866300  |
| N   | 3.48019600  | 1.07054600  | -0.09806800 |
| C   | 2.12640300  | 1.28619700  | -0.10192000 |
| C   | 1.40555700  | 0.08730300  | -0.01207300 |
| C   | 1.33637200  | 2.45679400  | -0.17647500 |
| N   | 0.02073600  | 2.33708000  | -0.16223400 |
| C   | -0.54653300 | 1.10568800  | -0.07138400 |
| N   | 0.08681600  | -0.05847900 | 0.00993400  |
| C   | 1.96192000  | 3.81276600  | -0.26393800 |
| N   | -1.91559400 | 1.14195900  | -0.05619800 |
| N   | -2.66077100 | 0.01328300  | -0.07693800 |
| H   | 3.25138500  | -4.11202200 | 0.26961100  |
| H   | 5.52915500  | -3.04291600 | 0.16821600  |
| H   | 5.74769900  | -0.56818500 | -0.00823200 |

|   |             |             |             |
|---|-------------|-------------|-------------|
| H | 1.20314900  | -2.63259100 | 0.18461100  |
| H | 2.53481700  | 4.02061200  | 0.65191000  |
| H | 2.67078100  | 3.85050100  | -1.10304600 |
| H | 1.19037000  | 4.57926900  | -0.39250400 |
| H | -2.32571000 | 2.06472200  | -0.17257900 |
| C | -3.92896700 | 0.13242300  | -0.01474700 |
| O | -4.61118900 | -1.03171700 | 0.01830800  |
| C | -5.93498500 | -1.10257600 | -0.50707300 |
| H | -5.95733500 | -1.99288800 | -1.15122300 |
| H | -6.14231500 | -0.23387400 | -1.14906400 |
| C | -6.95404500 | -1.23251300 | 0.60646200  |
| H | -7.95752800 | -1.37954000 | 0.18446600  |
| H | -6.71119100 | -2.09779600 | 1.23817200  |
| H | -6.97281600 | -0.33642700 | 1.24279300  |
| C | -4.66387900 | 1.44122600  | 0.07820800  |
| H | -4.64556900 | 1.97956600  | -0.88192500 |
| H | -5.70708400 | 1.30443300  | 0.37815700  |
| H | -4.17782800 | 2.07844300  | 0.83186600  |

### In4

|     |             |             |             |
|-----|-------------|-------------|-------------|
| O 1 |             |             |             |
| C   | -2.78347800 | -2.32639200 | -0.35758900 |
| C   | -3.94918400 | -1.53254300 | -0.10368700 |
| C   | -3.83753800 | -0.18829800 | 0.10160500  |
| C   | -2.55796700 | 0.43329400  | 0.03762400  |
| N   | -1.44043400 | -0.38130400 | -0.28719300 |
| C   | -1.55455300 | -1.75434500 | -0.43604500 |
| N   | -2.21072600 | 1.68454000  | 0.24257500  |
| C   | -0.86147900 | 1.71406900  | 0.05412600  |
| C   | -0.37124900 | 0.46399300  | -0.29805400 |
| C   | 0.07742900  | 2.80161300  | 0.23620200  |
| N   | 1.35518300  | 2.59916600  | 0.12617200  |
| C   | 1.82020100  | 1.35164900  | -0.21358800 |
| N   | 0.95688400  | 0.29164800  | -0.57780100 |
| C   | -0.44553400 | 4.15635100  | 0.58904000  |
| N   | 3.05757500  | 1.00665700  | -0.26478600 |
| N   | 3.07647400  | -0.28815800 | -0.76930900 |
| H   | -2.86349100 | -3.40652200 | -0.46986200 |
| H   | -4.92484700 | -2.01579200 | -0.05274700 |
| H   | -4.69487900 | 0.44462400  | 0.32780200  |
| H   | -0.62752700 | -2.30968300 | -0.55515700 |
| H   | -1.11218600 | 4.51796000  | -0.20759600 |
| H   | -1.04801300 | 4.09781400  | 1.50709400  |
| H   | 0.38277200  | 4.85860700  | 0.72827400  |
| C   | 1.75580300  | -0.91443900 | -0.79545300 |
| O   | 1.52961200  | -1.87256100 | 0.20198300  |
| C   | 1.67834500  | -1.43725000 | 1.54912900  |
| H   | 0.87657900  | -0.72016500 | 1.80054700  |
| H   | 2.64154300  | -0.91301400 | 1.66621300  |
| C   | 1.60876800  | -2.65104700 | 2.44784900  |

|   |            |             |             |     |             |             |             |
|---|------------|-------------|-------------|-----|-------------|-------------|-------------|
| H | 1.71620800 | -2.34983200 | 3.49805500  | O 1 |             |             |             |
| H | 0.64305100 | -3.16125600 | 2.32832200  | C   | -5.83653300 | -1.73577900 | -0.16470800 |
| H | 2.41221300 | -3.35777400 | 2.20062300  | C   | -6.49684600 | -0.79606500 | 0.69778300  |
| H | 3.82095300 | -0.86740600 | -0.39052000 | C   | -5.85852200 | 0.32279300  | 1.14857900  |
| C | 1.51427800 | -1.60174200 | -2.12960600 | C   | -4.50696100 | 0.56641200  | 0.75334100  |
| H | 2.23188600 | -2.42732600 | -2.22638700 | N   | -3.91124900 | -0.38803100 | -0.09320000 |
| H | 1.68272400 | -0.88020300 | -2.93618400 | C   | -4.55191500 | -1.51547200 | -0.54593600 |
| H | 0.49838100 | -2.00686600 | -2.21126700 | N   | -3.69621400 | 1.56004200  | 1.04756000  |

## Product

|     |             |             |             |   |             |             |             |
|-----|-------------|-------------|-------------|---|-------------|-------------|-------------|
| O 1 |             |             |             | C | -2.53269900 | 1.26484400  | 0.38072400  |
| C   | -4.43989300 | -1.78545900 | -0.37327700 | C | -2.63188500 | 0.06271900  | -0.33565300 |
| C   | -5.10230400 | -0.52052900 | -0.29636100 | C | -1.28565400 | 1.91890200  | 0.27545000  |
| C   | -4.37479100 | 0.63022300  | -0.22961500 | N | -0.33957700 | 1.37280400  | -0.46968700 |
| C   | -2.95263000 | 0.56673400  | -0.23945500 | C | -0.57067700 | 0.19697500  | -1.11659400 |
| N   | -2.33492000 | -0.70189400 | -0.32555900 | N | -1.70051600 | -0.50758900 | -1.08651100 |
| C   | -3.08437600 | -1.86105100 | -0.38591100 | C | -1.00206400 | 3.19465900  | 1.00592300  |
| N   | -2.07607000 | 1.54655200  | -0.17672800 | N | 0.48934700  | -0.23453800 | -1.85758200 |
| C   | -0.86430900 | 0.93954300  | -0.22082300 | N | 0.54869500  | -1.52265600 | -2.36887600 |
| C   | -0.98919300 | -0.44454700 | -0.31542100 | H | -6.35646800 | -2.62520500 | -0.51624300 |
| C   | 0.43949700  | 1.54965700  | -0.17039900 | H | -7.52907400 | -0.98662600 | 0.99370500  |
| N   | 1.50283900  | 0.80157500  | -0.21595700 | H | -6.34022600 | 1.04787800  | 1.80323000  |
| C   | 1.36774200  | -0.54253000 | -0.31523400 | H | -3.96380500 | -2.16491100 | -1.19436400 |
| N   | 0.14705300  | -1.23048100 | -0.37326200 | H | -1.93380400 | 3.71225400  | 1.26290700  |
| C   | 0.55143000  | 3.03395900  | -0.06080000 | H | -0.46616800 | 2.96972400  | 1.94093300  |
| N   | 2.34871600  | -1.41459800 | -0.37954300 | H | -0.36011100 | 3.84485800  | 0.39906000  |
| N   | 1.81419900  | -2.64208400 | -0.48173900 | H | 0.76475200  | -1.48666400 | -3.36372300 |
| H   | -5.01203000 | -2.71048300 | -0.42042100 | H | 1.30198000  | -2.02953800 | -1.90072300 |
| H   | -6.19146900 | -0.48495600 | -0.28881000 | H | 1.35040100  | 0.29366500  | -1.72172200 |
| H   | -4.83200900 | 1.61651200  | -0.16498300 | C | 3.74138000  | -0.65266400 | -0.77930200 |
| H   | -2.54311300 | -2.79742700 | -0.43964500 | O | 2.79261400  | -1.45858700 | -0.27871800 |
| H   | 0.05542100  | 3.51158000  | -0.91811100 | O | 3.24497200  | 0.57309100  | -1.06915000 |
| H   | 0.03153800  | 3.38105700  | 0.84373500  | O | 4.86559400  | -0.29850100 | 0.52772200  |
| H   | 1.60438100  | 3.33220100  | -0.02504400 | C | 5.43119200  | -1.46417000 | 1.05077400  |
| H   | 4.19632400  | -1.26302100 | -0.29844200 | H | 4.67610000  | -2.27222300 | 1.13202400  |
| C   | 0.50604600  | -2.56232600 | -0.48181100 | H | 6.24258600  | -1.85146000 | 0.40157400  |
| O   | 5.14993300  | -1.23551500 | -0.07761300 | C | 4.14341000  | 1.66844700  | -1.27914600 |
| C   | 5.25633800  | -0.51121500 | 1.12092800  | H | 3.91611400  | 2.08264800  | -2.27162800 |
| H   | 6.26445400  | -0.68935600 | 1.52979700  | H | 5.17568900  | 1.29828500  | -1.27415000 |
| H   | 4.54050900  | -0.88729800 | 1.87762100  | C | 2.03276300  | -0.97040600 | 0.83889800  |
| C   | 5.03979800  | 0.98095700  | 0.91667600  | H | 1.65715200  | 0.03706400  | 0.61133800  |
| H   | 5.15593100  | 1.53475800  | 1.86009800  | H | 2.71285000  | -0.89983400 | 1.70034900  |
| H   | 5.76753200  | 1.37247400  | 0.19052700  | C | 5.99415400  | -1.16149000 | 2.42978600  |
| H   | 4.02736800  | 1.16516300  | 0.52610800  | H | 5.19314500  | -0.82896800 | 3.10590000  |
| C   | -0.37232100 | -3.75826100 | -0.59247400 | H | 6.47117300  | -2.05172500 | 2.86345100  |
| H   | -1.01457600 | -3.71878900 | -1.48197500 | H | 6.74423700  | -0.36011200 | 2.36566300  |
| H   | 0.29394200  | -4.62205400 | -0.69065600 | C | 3.93580700  | 2.69232300  | -0.18480200 |
| H   | -0.98709600 | -3.90474500 | 0.30533700  | H | 4.20228700  | 2.24588700  | 0.78202200  |
|     |             |             |             | H | 4.56574400  | 3.57471100  | -0.36276400 |
|     |             |             |             | H | 2.88441400  | 3.01204600  | -0.15606000 |
|     |             |             |             | C | 0.90184100  | -1.94100200 | 1.08567200  |
|     |             |             |             | H | 0.30643000  | -1.60377100 | 1.94526000  |
|     |             |             |             | H | 0.23967800  | -2.00146500 | 0.20973000  |

TS1 (v = 144.25 i(cm-1))



|   |            |             |             |
|---|------------|-------------|-------------|
| H | 1.29054500 | -2.94532500 | 1.30498800  |
| C | 4.52680000 | -1.33485000 | -1.86008700 |
| H | 5.35926800 | -0.70357200 | -2.19029900 |
| H | 4.91188600 | -2.29505500 | -1.49905800 |
| H | 3.84929500 | -1.51679000 | -2.70685800 |

|   |             |            |             |
|---|-------------|------------|-------------|
| C | -4.07408700 | 1.50696000 | 0.25385100  |
| H | -3.46080700 | 2.34695000 | 0.59863400  |
| H | -4.71654000 | 1.16747300 | 1.07311800  |
| H | -4.70576900 | 1.84225900 | -0.58130800 |

**TS2 (v = 225.65 i(cm-1))**

|     |             |             |             |
|-----|-------------|-------------|-------------|
| 0 1 |             |             |             |
| C   | 2.88288700  | -3.20621200 | 0.13935600  |
| C   | 4.22078400  | -2.82301200 | 0.49083600  |
| C   | 4.58038000  | -1.50982000 | 0.58947900  |
| C   | 3.60679100  | -0.49645500 | 0.33478500  |
| N   | 2.31408100  | -0.93058600 | -0.01163800 |
| C   | 1.94888100  | -2.25131900 | -0.10636200 |
| N   | 3.70997200  | 0.81686300  | 0.36635800  |
| C   | 2.45932800  | 1.26817500  | 0.03456900  |
| C   | 1.57082400  | 0.21149100  | -0.20631900 |
| C   | 1.91494400  | 2.56283700  | -0.13292800 |
| N   | 0.63845700  | 2.67951300  | -0.45881800 |
| C   | -0.11332000 | 1.56673700  | -0.63059100 |
| N   | 0.29308900  | 0.30834900  | -0.55179400 |
| C   | 2.75633600  | 3.78751600  | 0.03606600  |
| N   | -1.43598100 | 1.81663600  | -0.92839600 |
| N   | -2.27917200 | 0.77531900  | -1.24430600 |
| H   | 2.60788900  | -4.25708600 | 0.06902500  |
| H   | 4.95990100  | -3.60168400 | 0.68216300  |
| H   | 5.58912600  | -1.19826100 | 0.85693900  |
| H   | 0.90876300  | -2.43793300 | -0.37384100 |
| H   | 3.30908000  | 3.74282300  | 0.98460100  |
| H   | 3.50261900  | 3.84107300  | -0.77081800 |
| H   | 2.12934200  | 4.68504900  | 0.00769200  |
| H   | -1.76973600 | -0.03792600 | -1.59266600 |
| H   | -1.60283500 | 2.68925600  | -1.41992000 |
| C   | -3.19966600 | 0.39894700  | -0.25411400 |
| O   | -2.27859000 | -0.21416400 | 1.15294500  |
| O   | -3.79685600 | -0.72555100 | -0.69067300 |
| C   | -2.25129800 | 0.51446500  | 2.33809300  |
| H   | -2.06514400 | -0.20913500 | 3.15619500  |
| H   | -3.23073400 | 0.97290600  | 2.58183400  |
| C   | -1.17217500 | 1.59079200  | 2.39454600  |
| H   | -1.35689900 | 2.38277800  | 1.65465500  |
| H   | -1.13033300 | 2.05033200  | 3.39373000  |
| H   | -0.18732600 | 1.14917500  | 2.17483600  |
| C   | -4.79101200 | -1.31371600 | 0.14308900  |
| H   | -5.73440400 | -0.75339600 | 0.03992000  |
| H   | -4.45121300 | -1.25216500 | 1.18678600  |
| C   | -4.96667700 | -2.75081400 | -0.28978500 |
| H   | -5.74274600 | -3.23483200 | 0.31745300  |
| H   | -5.26591200 | -2.80385000 | -1.34563200 |
| H   | -4.02528600 | -3.30234000 | -0.16347700 |

**TS3 (v = 236.73 i(cm-1))**

|     |             |             |             |
|-----|-------------|-------------|-------------|
| 0 1 |             |             |             |
| C   | -2.67929700 | -2.61768300 | -0.50112600 |
| C   | -3.90644300 | -1.97467700 | -0.12232200 |
| C   | -3.94276300 | -0.63830000 | 0.15068900  |
| C   | -2.74378000 | 0.13279900  | 0.07034000  |
| N   | -1.55823100 | -0.55394100 | -0.28397400 |
| C   | -1.53115300 | -1.89813300 | -0.58089800 |
| N   | -2.53552500 | 1.41374000  | 0.27106500  |
| C   | -1.19413300 | 1.58915100  | 0.04429200  |
| C   | -0.55954200 | 0.38967000  | -0.29232000 |
| C   | -0.35198100 | 2.73493300  | 0.12683800  |
| N   | 0.92282500  | 2.63145300  | -0.15294900 |
| C   | 1.46058700  | 1.41306200  | -0.51318400 |
| N   | 0.74642500  | 0.24494700  | -0.52977500 |
| C   | -0.92131200 | 4.05939100  | 0.53311400  |
| N   | 2.74844600  | 1.39557200  | -0.83677200 |
| N   | 3.04641100  | 0.09349200  | -1.27736000 |
| H   | -2.65933900 | -3.68027000 | -0.73686200 |
| H   | -4.81958500 | -2.56766300 | -0.06440400 |
| H   | -4.86161000 | -0.12325200 | 0.42869800  |
| H   | -0.56807900 | -2.30333000 | -0.88588800 |
| H   | -1.69576600 | 4.37223200  | -0.18257000 |
| H   | -1.40774500 | 3.97615600  | 1.51577600  |
| H   | -0.12958000 | 4.81512700  | 0.57288000  |
| H   | 3.06806700  | -0.00662500 | -2.29088900 |
| C   | 2.45600800  | -0.91179900 | -0.63242100 |
| O   | 2.63230900  | -0.91009400 | 0.67329200  |
| C   | 1.87291600  | -1.79630600 | 1.50205200  |
| H   | 2.27044800  | -2.81662800 | 1.39808800  |
| H   | 0.82543500  | -1.78162500 | 1.16174900  |
| C   | 1.98537000  | -1.30053100 | 2.92323200  |
| H   | 1.42640500  | -1.96733100 | 3.59213200  |
| H   | 3.03570900  | -1.28265300 | 3.24312500  |
| H   | 1.57011000  | -0.28717300 | 3.00797200  |
| C   | 2.19591500  | -2.19404800 | -1.35526100 |
| H   | 3.15270100  | -2.73032400 | -1.44585100 |
| H   | 1.51021200  | -2.83813700 | -0.79712500 |
| H   | 1.78933600  | -1.99976000 | -2.35294800 |

**TS4 (v = 247.31 i(cm-1))**

|     |             |            |            |
|-----|-------------|------------|------------|
| 0 1 |             |            |            |
| C   | -1.61141900 | 3.20986100 | 0.30591000 |
| C   | -3.01058900 | 2.99438000 | 0.08942000 |

|   |             |             |             |
|---|-------------|-------------|-------------|
| C | -3.49319700 | 1.73484400  | -0.11873900 |
| C | -2.60202800 | 0.62516200  | -0.07839000 |
| N | -1.24626900 | 0.87965300  | 0.24661200  |
| C | -0.74491900 | 2.16542700  | 0.36657600  |
| N | -2.82497600 | -0.65251100 | -0.30643200 |
| C | -1.62081000 | -1.26029400 | -0.12171600 |
| C | -0.64896400 | -0.34419400 | 0.25473000  |
| C | -1.23168100 | -2.63117700 | -0.37627800 |
| N | 0.01433700  | -2.99340100 | -0.28433700 |
| C | 0.94858300  | -2.08956800 | 0.13307500  |
| N | 0.62178200  | -0.77484400 | 0.53275900  |
| C | -2.27397900 | -3.61440000 | -0.79740300 |
| N | 2.21722200  | -2.30802100 | 0.26581100  |
| N | 2.71541400  | -1.13710200 | 0.76688700  |
| H | -1.21568700 | 4.22072000  | 0.39228100  |
| H | -3.68467600 | 3.85045400  | 0.05982300  |
| H | -4.54285600 | 1.53410200  | -0.32949000 |
| H | 0.34064600  | 2.25056800  | 0.40792400  |
| H | -2.80076200 | -3.24241200 | -1.68783900 |
| H | -1.81407300 | -4.58505900 | -1.00947300 |
| H | -3.02647200 | -3.72330400 | -0.00250000 |
| C | 1.80680400  | -0.12034100 | 0.89328900  |
| O | 1.93543800  | 1.14049500  | -0.44063100 |
| C | 3.20690500  | 1.12663400  | -0.99214300 |
| H | 3.44517600  | 0.14203500  | -1.44910600 |
| H | 3.99531500  | 1.29879500  | -0.22381100 |
| C | 3.32226400  | 2.20599700  | -2.05886200 |
| H | 4.31442900  | 2.19380700  | -2.53297100 |
| H | 2.56015700  | 2.04810600  | -2.83581600 |
| H | 3.15793700  | 3.19952800  | -1.61686000 |
| H | 3.66864900  | -1.10183000 | 1.10439700  |
| C | 1.91540700  | 0.77987200  | 2.08951100  |
| H | 2.88603600  | 1.29160200  | 2.05950600  |
| H | 1.12466600  | 1.53488100  | 2.10201900  |
| H | 1.85118900  | 0.17441900  | 3.00399100  |

**Route 2**

**Me:**

**In1**

|     |            |             |             |
|-----|------------|-------------|-------------|
| O 1 |            |             |             |
| C   | 6.38397400 | -2.33932700 | -1.05108100 |
| C   | 7.37998500 | -1.44201500 | -0.53568100 |
| C   | 7.03623000 | -0.24465500 | 0.02192600  |
| C   | 5.65777800 | 0.12593800  | 0.09463400  |
| N   | 4.72646300 | -0.79249500 | -0.42740700 |
| C   | 5.07118400 | -1.99791400 | -0.98785900 |

|   |             |             |             |
|---|-------------|-------------|-------------|
| N | 5.08718900  | 1.20814000  | 0.57855800  |
| C | 3.74295000  | 1.00967200  | 0.37507700  |
| C | 3.48512100  | -0.22081500 | -0.24747300 |
| C | 2.59773200  | 1.78262600  | 0.66055500  |
| N | 1.40273000  | 1.31455100  | 0.33470800  |
| C | 1.29280400  | 0.10526200  | -0.26562500 |
| N | 2.30474100  | -0.71236700 | -0.58448800 |
| C | 2.71281300  | 3.12057100  | 1.32270400  |
| N | 0.05210000  | -0.35275200 | -0.59034900 |
| N | -1.11103800 | 0.35242300  | -0.35304300 |
| H | 6.67123200  | -3.29202900 | -1.49246100 |
| H | 8.43043300  | -1.72944800 | -0.59361400 |
| H | 7.77590800  | 0.44945400  | 0.41886400  |
| H | 4.24216100  | -2.60702400 | -1.34821900 |
| H | 3.19163500  | 3.01565800  | 2.30732100  |
| H | 3.35123500  | 3.78564300  | 0.72324400  |
| H | 1.72092200  | 3.56947500  | 1.44223700  |
| H | -1.57644200 | 0.60662800  | -1.22396000 |
| H | -1.77531100 | -0.20914700 | 0.18217300  |
| H | 0.03121200  | -1.24750100 | -1.07048000 |
| C | -4.38171000 | -0.60842200 | -0.55291600 |
| O | -3.95499500 | 0.68058800  | -0.84234800 |
| O | -3.68620500 | -1.02499400 | 0.58774300  |
| O | -5.73689600 | -0.63269400 | -0.21919400 |
| C | -6.65210500 | -0.27639600 | -1.24242500 |
| H | -6.26957600 | 0.60030300  | -1.79255600 |
| H | -6.75763500 | -1.10598000 | -1.96194900 |
| C | -4.15882100 | -2.17334300 | 1.28250600  |
| H | -3.27256000 | -2.77820300 | 1.52501900  |
| H | -4.80543400 | -2.77436900 | 0.62640400  |
| C | -4.27542700 | 1.67231100  | 0.12873200  |
| H | -4.07172600 | 1.27760700  | 1.13580000  |
| H | -5.35173900 | 1.90628900  | 0.07113800  |
| C | -7.98298000 | 0.03392500  | -0.59343800 |
| H | -7.88465300 | 0.87758100  | 0.10391500  |
| H | -8.72756800 | 0.29448100  | -1.35722400 |
| H | -8.34786900 | -0.83875900 | -0.03408300 |
| C | -4.89834800 | -1.78165300 | 2.54682100  |
| H | -5.79718000 | -1.20375600 | 2.29533800  |
| H | -5.19500400 | -2.67769500 | 3.11030100  |
| H | -4.25238700 | -1.16773300 | 3.19072700  |
| C | -3.43661800 | 2.89808600  | -0.15843500 |
| H | -3.68205600 | 3.69953000  | 0.55136300  |
| H | -2.36917700 | 2.65494000  | -0.06696200 |
| H | -3.62895600 | 3.26589300  | -1.17635200 |
| C | -4.03438300 | -1.47287800 | -1.75440700 |
| H | -2.94456100 | -1.46038400 | -1.88005500 |
| H | -4.50062600 | -1.08165700 | -2.66676900 |
| H | -4.36966100 | -2.50488600 | -1.58885500 |

**In2**

0 1  
 C -5.20457300 -1.37836700 -0.50789100  
 C -5.86978800 -0.29757700 0.16426400  
 C -5.18800200 0.81269900 0.56994900  
 C -3.78358400 0.90310500 0.32155600  
 N -3.18542400 -0.18496200 -0.34203100  
 C -3.87046900 -1.30333500 -0.75020700  
 N -2.92445200 1.85613200 0.61345300  
 C -1.72293300 1.39696300 0.13349100  
 C -1.85055100 0.13385200 -0.46606400  
 C -0.41840500 1.93151500 0.12300500  
 N 0.55934000 1.23641100 -0.44012300  
 C 0.30039600 0.02639900 -0.97595900  
 N -0.88535100 -0.58442000 -1.01667800  
 C -0.11066300 3.25512700 0.75071900  
 N 1.32838200 -0.65208400 -1.59470600  
 N 2.63477000 -0.37510700 -1.26037300  
 H -5.76011200 -2.25928700 -0.82463900  
 H -6.94161100 -0.37215000 0.35103000  
 H -5.67393100 1.64292700 1.08077500  
 H -3.27623100 -2.06727600 -1.25153200  
 H -1.00273900 3.89288900 0.77294400  
 H 0.22100600 3.09946200 1.78927500  
 H 0.70257900 3.75228500 0.20832800  
 H 3.22999800 -0.40056300 -2.08519700  
 H 1.08302100 -1.61479200 -1.82169400  
 C 3.21533400 -1.19544800 -0.19660500  
 O 2.24942300 -1.18714800 0.81234300  
 O 4.40621500 -0.59732900 0.20501400  
 C 2.58730400 -1.82694300 2.03406600  
 H 2.36693500 -1.11104100 2.84099500  
 H 3.67004100 -2.02411900 2.06974200  
 C 1.78155300 -3.09741700 2.22707500  
 H 2.02343500 -3.84324000 1.45717100  
 H 1.98892400 -3.53698100 3.21271300  
 H 0.70680700 -2.87571600 2.16594800  
 C 4.30085700 0.74045800 0.69120400  
 H 4.73547700 0.75295500 1.70358000  
 H 3.24137700 1.02233300 0.76642800  
 C 5.04574400 1.69171400 -0.22283200  
 H 5.04340300 2.70846500 0.19486800  
 H 6.08977900 1.37132500 -0.34764100  
 H 4.56568300 1.71789200 -1.21079500  
 C 3.57270500 -2.60369500 -0.65439200  
 H 4.32325300 -2.54611800 -1.45328600  
 H 2.67636500 -3.11544100 -1.03096000  
 H 3.99322900 -3.19129400 0.17241500

**In3**

0 1

C -4.70458000 -2.25023200 -0.33246800  
 C -5.63407100 -1.16652100 -0.17997200  
 C -5.20526800 0.11752200 -0.00563400  
 C -3.80297200 0.39021300 0.02595400  
 N -2.93934600 -0.71098400 -0.12850400  
 C -3.36957100 -2.00334500 -0.30404600  
 N -3.15597800 1.52628400 0.17993400  
 C -1.82974900 1.17775900 0.12770300  
 C -1.66052400 -0.20285200 -0.06235400  
 C -0.63345100 1.91892600 0.22451800  
 N 0.52728900 1.28485800 0.13829600  
 C 0.54579600 -0.05174000 -0.04878200  
 N -0.51472800 -0.85637100 -0.16032300  
 C -0.65460500 3.40237500 0.41960400  
 N 1.75991600 -0.68519700 -0.11674300  
 N 2.92729800 -0.00062400 -0.20140700  
 H -5.05969600 -3.26989000 -0.47025100  
 H -6.70319800 -1.38021400 -0.20470300  
 H -5.89456300 0.95259200 0.11127500  
 H -2.58655800 -2.75391700 -0.41125700  
 H -1.13664600 3.88823000 -0.44163800  
 H -1.24840700 3.66058800 1.30812700  
 H 0.36580700 3.78416100 0.53013700  
 H 1.71237400 -1.67956300 -0.32255700  
 C 4.01560000 -0.66618400 -0.19784800  
 O 5.13095600 0.08906800 -0.29505700  
 C 6.40099500 -0.49284300 -0.56474700  
 H 6.92703800 0.24017400 -1.19084200  
 H 6.28948300 -1.40808900 -1.16452700  
 C 7.18162600 -0.74364400 0.71078200  
 H 8.19090100 -1.10453900 0.47016900  
 H 7.27228200 0.18927100 1.28368100  
 H 6.69071300 -1.49168100 1.34903900  
 C 4.10816800 -2.16312900 -0.09147900  
 H 3.92594900 -2.64176800 -1.06629600  
 H 5.08493000 -2.49485200 0.27219000  
 H 3.34930400 -2.52713200 0.61483800

**In4**

0 1

C 3.39425200 -2.73723100 1.09413300  
 C 4.34369700 -2.22033000 2.04670300  
 C 4.30497300 -0.92461000 2.46416800  
 C 3.29507300 -0.04824600 1.94533500  
 N 2.39189600 -0.61260700 1.01821000  
 C 2.43340600 -1.92058100 0.59684800  
 N 3.06279600 1.21377000 2.18925200  
 C 1.96427200 1.52787100 1.40922100  
 C 1.51696700 0.39334800 0.65345900  
 C 1.27925400 2.71128600 1.23641200

|   |             |             |             |
|---|-------------|-------------|-------------|
| N | 0.20574000  | 2.64359000  | 0.40316200  |
| C | -0.14094200 | 1.48314000  | -0.35325500 |
| N | 0.53857000  | 0.31043500  | -0.19596500 |
| C | 1.67924600  | 3.97895700  | 1.90984800  |
| N | -1.12515700 | 1.69734900  | -1.15105900 |
| N | -1.57610500 | 2.99824500  | -0.86428700 |
| H | 3.44179200  | -3.77557800 | 0.77175600  |
| H | 5.10994800  | -2.88999800 | 2.43934300  |
| H | 5.01571000  | -0.51990900 | 3.18328300  |
| H | 1.66819200  | -2.20806400 | -0.12454100 |
| H | 2.64421300  | 3.82107800  | 2.40281400  |
| H | 1.76101700  | 4.79179600  | 1.17550900  |
| H | 0.93754100  | 4.26755100  | 2.66824100  |
| H | -1.89690400 | 3.46019400  | -1.70984200 |
| C | -0.54639500 | 3.76483100  | -0.16851300 |
| O | 0.37897600  | 4.41081000  | -1.01731800 |
| C | 0.09359300  | 5.71274200  | -1.50671200 |
| H | 1.01778800  | 6.02374300  | -2.01139200 |
| H | -0.06935600 | 6.41304200  | -0.67142100 |
| C | -1.06664500 | 5.76892700  | -2.48696200 |
| H | -1.11234300 | 6.76545900  | -2.94714900 |
| H | -0.92954500 | 5.02648300  | -3.28653300 |
| H | -2.03647600 | 5.59258800  | -1.99815800 |
| C | -1.19534200 | 4.70217600  | 0.84088600  |
| H | -0.48261500 | 5.40499400  | 1.28576000  |
| H | -1.98250500 | 5.27604300  | 0.33313300  |
| H | -1.67055200 | 4.10328700  | 1.62599400  |

|   |             |            |             |
|---|-------------|------------|-------------|
| H | 3.01187700  | 3.69835500 | 3.02080400  |
| H | 3.26025900  | 4.78624000 | 1.62742300  |
| H | 1.67697500  | 4.73120300 | 2.44300200  |
| H | -0.17052900 | 5.38657700 | -2.74569900 |
| C | 1.14611400  | 4.35790400 | -0.65547100 |
| O | -0.73219100 | 6.17031300 | -2.92165100 |
| C | -1.95985300 | 5.89596800 | -2.28964600 |
| H | -2.58969900 | 6.79385900 | -2.38937900 |
| H | -1.81607600 | 5.72919500 | -1.20360400 |
| C | -2.66346100 | 4.69316800 | -2.89906100 |
| H | -3.63416400 | 4.51135300 | -2.41546400 |
| H | -2.83239000 | 4.85585000 | -3.97349600 |
| H | -2.04304800 | 3.79145500 | -2.78060800 |
| C | 1.28059600  | 5.77432400 | -0.21236200 |
| H | 2.32947600  | 6.07596000 | -0.09705500 |
| H | 0.81715400  | 6.38744300 | -0.99574700 |
| H | 0.75376700  | 5.95846800 | 0.73244500  |

**TS1 (v = 164.70 i(cm-1))**

0 1

|   |             |             |             |
|---|-------------|-------------|-------------|
| C | -3.25986700 | 2.48682900  | 2.54835900  |
| C | -4.21061300 | 2.75436800  | 1.50590200  |
| C | -4.23827800 | 2.00894900  | 0.36339200  |
| C | -3.30289000 | 0.94149600  | 0.19923600  |
| N | -2.39546100 | 0.72292700  | 1.25404500  |
| C | -2.36801800 | 1.47237600  | 2.40517600  |
| N | -3.13648400 | 0.10022300  | -0.79823900 |
| C | -2.09277500 | -0.69954000 | -0.40405500 |
| C | -1.60933500 | -0.34034100 | 0.86364300  |
| C | -1.43455700 | -1.79019800 | -1.00508000 |
| N | -0.41936900 | -2.36024100 | -0.37256400 |
| C | -0.02971000 | -1.89225600 | 0.83166900  |
| N | -0.60585600 | -0.89962200 | 1.51720400  |
| C | -1.87740100 | -2.33719000 | -2.32701800 |
| N | 1.03712700  | -2.49282500 | 1.45654600  |
| N | 1.98029300  | -3.19384400 | 0.71551300  |
| H | -3.24924400 | 3.08771800  | 3.45592600  |
| H | -4.92351600 | 3.56910900  | 1.63672000  |
| H | -4.95193900 | 2.19328000  | -0.43841800 |
| H | -1.61583000 | 1.18700900  | 3.14101500  |
| H | -2.33747300 | -1.55098600 | -2.93901300 |
| H | -1.02859400 | -2.78778200 | -2.85551600 |
| H | -2.63401700 | -3.12113500 | -2.16588700 |
| H | 2.77747800  | -2.58615400 | 0.51759200  |
| H | 2.30366000  | -3.99441700 | 1.25329400  |
| H | 1.36977100  | -1.94804900 | 2.24951000  |
| C | 2.22388500  | 0.71917800  | 0.33475000  |
| O | 1.38799900  | 0.33710500  | -0.63591000 |
| O | 2.94636100  | -0.31900900 | 0.81465800  |
| O | 3.47988600  | 1.68246000  | -0.43476300 |

**Product**

0 1

|   |            |             |             |
|---|------------|-------------|-------------|
| C | 2.43117500 | -2.83280700 | 1.53823300  |
| C | 3.04737500 | -2.56450100 | 2.80851500  |
| C | 3.23570300 | -1.29139200 | 3.25964000  |
| C | 2.80786200 | -0.19311000 | 2.44843700  |
| N | 2.21154700 | -0.51671100 | 1.21757200  |
| C | 2.02237500 | -1.79845900 | 0.76145900  |
| N | 2.88184400 | 1.09809200  | 2.67065000  |
| C | 2.31836300 | 1.68182000  | 1.55957400  |
| C | 1.88353900 | 0.68421900  | 0.61521500  |
| C | 2.12554500 | 3.00518600  | 1.24487400  |
| N | 1.51545400 | 3.21386300  | 0.02216400  |
| C | 1.13208300 | 2.16219800  | -0.84021300 |
| N | 1.31828800 | 0.86287500  | -0.53781500 |
| C | 2.53969900 | 4.12798200  | 2.13075600  |
| N | 0.59116300 | 2.66245400  | -1.92957600 |
| N | 0.61156900 | 4.00119300  | -1.79823700 |
| H | 2.29052900 | -3.85541700 | 1.19404000  |
| H | 3.37026000 | -3.40563900 | 3.42331600  |
| H | 3.70176300 | -1.07206000 | 4.21880600  |
| H | 1.54655400 | -1.88924600 | -0.21515100 |

|   |            |             |             |   |            |             |             |
|---|------------|-------------|-------------|---|------------|-------------|-------------|
| C | 2.95527900 | 2.82278800  | -1.04313300 | H | 0.71174800 | 3.39469900  | -0.07625000 |
| H | 1.97271900 | 2.60920600  | -1.51082600 | H | 2.38993200 | 0.40550800  | -1.59278600 |
| H | 2.78433300 | 3.63724100  | -0.30834600 | H | 0.94970900 | -1.91490700 | -1.86712300 |
| C | 3.87617000 | -0.04187500 | 1.86280600  | C | 3.35162100 | -0.86718500 | -0.37749400 |
| H | 3.32398100 | 0.19163400  | 2.78753800  | O | 2.75301200 | -0.08844600 | 1.11894700  |
| H | 4.46842900 | 0.83732100  | 1.57419900  | O | 4.44865800 | -0.13232600 | -0.64061900 |
| C | 1.92964900 | -0.50777300 | -1.66323600 | C | 2.30941500 | -0.87157000 | 2.18017400  |
| H | 1.81547600 | -1.55594600 | -1.34895500 | H | 2.42590900 | -0.26331500 | 3.09890000  |
| H | 2.99644300 | -0.27136000 | -1.77223100 | H | 2.94391600 | -1.76509300 | 2.34804800  |
| C | 3.91976300 | 3.30830100  | -2.11358900 | C | 0.85225600 | -1.31019400 | 2.07781200  |
| H | 4.04693800 | 2.53923100  | -2.88966200 | H | 0.69716500 | -1.99375400 | 1.23085900  |
| H | 3.55193800 | 4.22905400  | -2.58856700 | H | 0.53289300 | -1.82057200 | 2.99914100  |
| H | 4.90552300 | 3.51441000  | -1.67175700 | H | 0.20374200 | -0.43305400 | 1.92449700  |
| C | 4.74453000 | -1.26356000 | 2.05304300  | C | 5.54878800 | -0.23752600 | 0.25755800  |
| H | 5.28794400 | -1.49767600 | 1.12713200  | H | 6.06948900 | -1.19439800 | 0.09108100  |
| H | 5.47623800 | -1.08328700 | 2.85126900  | H | 5.16104000 | -0.21707500 | 1.28636300  |
| H | 4.13783700 | -2.13598300 | 2.33508100  | C | 6.47251500 | 0.92921800  | -0.00502900 |
| C | 1.16565900 | -0.22904800 | -2.93698100 | H | 7.34591500 | 0.87509600  | 0.65791500  |
| H | 1.49157000 | -0.91594200 | -3.72977700 | H | 6.82341700 | 0.91819900  | -1.04611700 |
| H | 0.08696000 | -0.36887600 | -2.77801900 | H | 5.95039500 | 1.87791900  | 0.17863200  |
| H | 1.33495600 | 0.80278300  | -3.27568900 | C | 3.54172500 | -2.32108100 | -0.05976800 |
| C | 1.55710300 | 1.62545800  | 1.32901100  | H | 2.57594500 | -2.79431200 | 0.14875600  |
| H | 0.92312900 | 1.00903400  | 1.98231600  | H | 4.20524300 | -2.45868600 | 0.80009700  |
| H | 2.30207000 | 2.16756900  | 1.92164700  | H | 3.99394200 | -2.79933000 | -0.94054900 |
| H | 0.92579400 | 2.34470400  | 0.79454300  |   |            |             |             |

### TS3 (v = 235.83 i(cm-1))

|     |             |             |             |
|-----|-------------|-------------|-------------|
| O 1 |             |             |             |
| C   | 4.85251800  | -1.14708900 | 0.63166300  |
| C   | 5.31245700  | 0.19994700  | 0.42373500  |
| C   | 4.45528700  | 1.19401300  | 0.05336200  |
| C   | 3.06793300  | 0.89464400  | -0.13204700 |
| N   | 2.67541700  | -0.44296000 | 0.08697100  |
| C   | 3.53930500  | -1.44391200 | 0.45827200  |
| N   | 2.06745300  | 1.66721300  | -0.48027000 |
| C   | 0.97229900  | 0.83040500  | -0.49766900 |
| C   | 1.31480000  | -0.49462700 | -0.14906600 |
| C   | -0.39103500 | 1.04998500  | -0.74648100 |
| N   | -1.20965000 | 0.01085500  | -0.64640700 |
| C   | -0.76274600 | -1.27722400 | -0.38064700 |
| N   | 0.53437100  | -1.54864000 | -0.08065400 |
| C   | -0.91913900 | 2.40613900  | -1.10165700 |
| N   | -1.64468300 | -2.27182500 | -0.41913500 |
| N   | -2.86354300 | -1.75010800 | -0.90249900 |
| H   | 5.54739400  | -1.93129100 | 0.92661200  |
| H   | 6.37033000  | 0.42352400  | 0.56687400  |
| H   | 4.78531200  | 2.21941900  | -0.10841200 |
| H   | 3.09098800  | -2.42907100 | 0.58868400  |
| H   | -0.08945900 | 3.07000100  | -1.37043000 |
| H   | -1.62298900 | 2.33682100  | -1.94151700 |
| H   | -1.44912500 | 2.85413100  | -0.24762300 |

### TS2 (v = 229.81 i(cm-1))

|     |             |             |             |
|-----|-------------|-------------|-------------|
| O 1 |             |             |             |
| C   | -5.37620600 | -1.68535500 | -0.11955400 |
| C   | -6.03958900 | -0.50993300 | 0.36996400  |
| C   | -5.36140200 | 0.65789700  | 0.56804000  |
| C   | -3.96265200 | 0.71318700  | 0.28175300  |
| N   | -3.36665100 | -0.46834500 | -0.19668300 |
| C   | -4.04697500 | -1.64468100 | -0.39466900 |
| N   | -3.10663600 | 1.70761200  | 0.39112800  |
| C   | -1.90937400 | 1.17865200  | -0.01923800 |
| C   | -2.03524300 | -0.17098000 | -0.38949800 |
| C   | -0.61924100 | 1.72573800  | -0.17338100 |
| N   | 0.35911500  | 0.93900300  | -0.60221900 |
| C   | 0.10856000  | -0.35689200 | -0.86993600 |
| N   | -1.07201100 | -0.97027700 | -0.81842500 |
| C   | -0.34049300 | 3.16502900  | 0.12245300  |
| N   | 1.17691600  | -1.14041200 | -1.25183400 |
| N   | 2.43272500  | -0.59666200 | -1.40393200 |
| H   | -5.92772600 | -2.61117300 | -0.27264100 |
| H   | -7.10734300 | -0.55787400 | 0.58642100  |
| H   | -5.84567200 | 1.55970400  | 0.94006000  |
| H   | -3.45262000 | -2.47934500 | -0.76621600 |
| H   | -0.98443800 | 3.81038800  | -0.49229300 |
| H   | -0.57333800 | 3.38507800  | 1.17459100  |

|   |             |             |             |
|---|-------------|-------------|-------------|
| H | -2.99156000 | -1.88273900 | -1.90424200 |
| C | -3.19136400 | -0.52539900 | -0.47656400 |
| O | -3.23460000 | -0.39984000 | 0.83621900  |
| C | -3.46648700 | 0.88324600  | 1.42309100  |
| H | -4.48460300 | 1.21801700  | 1.17548500  |
| H | -2.74444800 | 1.59623300  | 0.99705800  |
| C | -3.28011200 | 0.74310900  | 2.91424500  |
| H | -3.45377200 | 1.71111100  | 3.40131200  |
| H | -3.98971800 | 0.01189200  | 3.32368600  |
| H | -2.25820300 | 0.41262100  | 3.14280000  |
| C | -4.01464200 | 0.37552900  | -1.33823200 |
| H | -3.81093400 | 0.18332400  | -2.39662000 |
| H | -3.79369900 | 1.42516200  | -1.11663600 |
| H | -5.07872000 | 0.19522300  | -1.12485000 |

|   |            |            |             |
|---|------------|------------|-------------|
| C | 3.47710800 | 0.82765600 | -1.74594400 |
| H | 3.48838500 | 1.88289400 | -1.46212600 |
| H | 4.51125200 | 0.45853400 | -1.74535700 |
| H | 3.07209800 | 0.71175300 | -2.76033800 |

### Route 1

Et:

In1

O 1

|   |             |             |             |
|---|-------------|-------------|-------------|
| C | 5.84757100  | -1.76600600 | 0.07781800  |
| C | 6.53984300  | -0.72605600 | -0.63024300 |
| C | 5.91873100  | 0.44552600  | -0.95445300 |
| C | 4.55363900  | 0.64208100  | -0.58224200 |
| N | 3.92659100  | -0.40993800 | 0.11239600  |
| C | 4.54998500  | -1.58934100 | 0.43834900  |
| N | 3.75209600  | 1.66756600  | -0.77942800 |
| C | 2.56474700  | 1.29172400  | -0.20265300 |
| C | 2.63738500  | 0.01076400  | 0.35971100  |
| C | 1.30962800  | 1.92969300  | -0.07254100 |
| N | 0.33356300  | 1.29614600  | 0.55145700  |
| C | 0.54142100  | 0.04649700  | 1.06058400  |
| N | 1.67616000  | -0.64724000 | 0.99388700  |
| C | 1.07457100  | 3.29616600  | -0.63579900 |
| N | -0.54670200 | -0.47198200 | 1.69360300  |
| N | -0.61992800 | -1.81946100 | 2.02528300  |
| H | 6.35376200  | -2.69621300 | 0.32959000  |
| H | 7.58216100  | -0.88168200 | -0.91064100 |
| H | 6.42563500  | 1.24699200  | -1.49040000 |
| H | 3.93959200  | -2.31436300 | 0.97672000  |
| H | 1.80749100  | 4.00584800  | -0.22591200 |
| H | 1.21519200  | 3.28252200  | -1.72650700 |
| H | 0.05979100  | 3.63564600  | -0.40187000 |
| H | -0.87138000 | -1.91103700 | 3.00845100  |
| H | -1.36864500 | -2.24080300 | 1.47111400  |
| H | -1.41769000 | 0.04492500  | 1.56218400  |
| C | -3.82586800 | -0.80704700 | 0.47658400  |
| O | -2.76991400 | -1.51157600 | -0.08165400 |
| O | -3.28113700 | 0.32839800  | 1.09512600  |
| O | -4.69002700 | -0.31988200 | -0.50283600 |
| C | -5.43169900 | -1.25957100 | -1.26094700 |
| H | -4.79180700 | -2.11964600 | -1.52150400 |
| H | -6.28076900 | -1.63500300 | -0.66483100 |
| C | -4.14982100 | 1.39970500  | 1.45052000  |
| H | -3.87236200 | 1.70187700  | 2.47117500  |
| H | -5.19137200 | 1.04875400  | 1.47458600  |
| C | -2.03378300 | -0.84684400 | -1.10688200 |
| H | -1.70152500 | 0.13780200  | -0.74215400 |

### TS4 (v = 235.83 i(cm-1))

O 1

|   |             |             |             |
|---|-------------|-------------|-------------|
| C | -4.76118300 | -1.10295100 | 0.70326200  |
| C | -5.19331900 | 0.26757200  | 0.61186600  |
| C | -4.32714800 | 1.27243700  | 0.30242100  |
| C | -2.94867200 | 0.96118500  | 0.06177000  |
| N | -2.58539600 | -0.39765600 | 0.16458500  |
| C | -3.46046700 | -1.41092500 | 0.47755300  |
| N | -1.94787800 | 1.74478900  | -0.24403900 |
| C | -0.86036700 | 0.90088800  | -0.36028800 |
| C | -1.23116400 | -0.46494600 | -0.10079400 |
| C | 0.45891200  | 1.16462000  | -0.64123500 |
| N | 1.26306000  | 0.05579500  | -0.70190500 |
| C | 0.81867100  | -1.25973300 | -0.37650700 |
| N | -0.47991000 | -1.52243500 | -0.08261800 |
| C | 0.99864200  | 2.53667600  | -0.83504000 |
| N | 1.79445200  | -2.10816000 | -0.41411700 |
| N | 2.87517900  | -1.36180400 | -0.82199800 |
| H | -5.46822200 | -1.89224000 | 0.95074500  |
| H | -6.24302000 | 0.49983900  | 0.79622000  |
| H | -4.63850900 | 2.31333300  | 0.23018000  |
| H | -3.02937900 | -2.41122600 | 0.52168800  |
| H | 0.19868700  | 3.25747600  | -0.63660900 |
| H | 1.83518400  | 2.68638000  | -0.13841800 |
| H | 1.36229500  | 2.67987000  | -1.86220400 |
| H | 3.79223000  | -1.78738700 | -0.81156200 |
| C | 2.67393900  | -0.00750600 | -0.79195700 |
| O | 3.04592400  | 0.70755200  | 0.83982800  |
| C | 4.38107600  | 0.98219900  | 1.09988200  |
| H | 4.43063300  | 1.47345200  | 2.09158700  |
| H | 4.80810300  | 1.72307800  | 0.38875000  |
| C | 5.29234000  | -0.24452400 | 1.13584000  |
| H | 6.28004700  | 0.01306300  | 1.54545600  |
| H | 4.84415700  | -1.02682000 | 1.76661100  |
| H | 5.46113600  | -0.66680300 | 0.13302300  |

|   |             |             |             |
|---|-------------|-------------|-------------|
| H | -2.68890100 | -0.68336000 | -1.97761400 |
| C | -5.92974200 | -0.56293800 | -2.50827600 |
| H | -5.08456400 | -0.21750100 | -3.11989900 |
| H | -6.54028500 | -1.24873700 | -3.11041700 |
| H | -6.54447500 | 0.30751200  | -2.23970900 |
| C | -3.99341700 | 2.55722500  | 0.48475700  |
| H | -4.29858100 | 2.24763700  | -0.52338800 |
| H | -4.61087400 | 3.40996800  | 0.80052000  |
| H | -2.94331600 | 2.88215400  | 0.45248100  |
| C | -0.85439100 | -1.72201600 | -1.47026300 |
| H | -0.24736400 | -1.23194500 | -2.24409900 |
| H | -0.21730500 | -1.90332900 | -0.59213400 |
| H | -1.19687000 | -2.69162100 | -1.85907000 |
| C | -4.47641000 | -1.71100800 | 1.53485600  |
| H | -3.81019200 | -1.64028600 | 2.40759300  |
| H | -5.43213300 | -1.24820600 | 1.82553600  |
| C | -4.66164500 | -3.18416300 | 1.18313000  |
| H | -4.98307500 | -3.73488800 | 2.07771300  |
| H | -5.41705600 | -3.35082100 | 0.40595600  |
| H | -3.71500100 | -3.62042100 | 0.83770200  |

|   |             |             |             |
|---|-------------|-------------|-------------|
| O | -4.22882600 | -0.74888900 | -0.87936500 |
| C | -2.65671000 | 0.50060300  | 1.94262100  |
| H | -2.56354700 | -0.28369600 | 2.70780400  |
| H | -3.60907500 | 1.01675900  | 2.13432700  |
| C | -1.48534700 | 1.46111400  | 2.04757000  |
| H | -1.56821000 | 2.28581700  | 1.32554300  |
| H | -1.43658500 | 1.89002400  | 3.05849100  |
| H | -0.54243500 | 0.92974500  | 1.84817500  |
| C | -5.06162700 | -1.36242800 | 0.09192500  |
| H | -6.07274200 | -1.41789100 | -0.33925400 |
| H | -5.12568800 | -0.73939000 | 0.99822300  |
| C | -4.55123300 | -2.74656100 | 0.44374200  |
| H | -4.48179300 | -3.36706200 | -0.46085100 |
| H | -3.55362800 | -2.67145500 | 0.89639700  |
| H | -5.23089500 | -3.24056600 | 1.15241000  |
| C | -4.14686800 | 1.56228900  | -0.21010100 |
| H | -4.93583700 | 1.38023200  | 0.53380600  |
| H | -3.48561500 | 2.32691200  | 0.22294800  |
| C | -4.77639800 | 2.07032600  | -1.50226900 |
| H | -5.42330200 | 2.93395000  | -1.30175700 |
| H | -4.01857000 | 2.38881600  | -2.23373600 |
| H | -5.38485800 | 1.28222200  | -1.96666600 |

## In2

O 1

|   |             |             |             |
|---|-------------|-------------|-------------|
| C | 3.14952300  | -3.20133800 | 0.07421800  |
| C | 4.39885300  | -2.69146300 | 0.56485300  |
| C | 4.60998800  | -1.35050800 | 0.70890300  |
| C | 3.56850600  | -0.43572800 | 0.36379900  |
| N | 2.36690100  | -0.99208300 | -0.11235700 |
| C | 2.15213400  | -2.34075500 | -0.25669400 |
| N | 3.53399500  | 0.87982400  | 0.41325400  |
| C | 2.28154400  | 1.20836500  | -0.03942000 |
| C | 1.53154500  | 0.07204400  | -0.37383200 |
| C | 1.61910300  | 2.44091200  | -0.24001700 |
| N | 0.37885200  | 2.42857300  | -0.69596900 |
| C | -0.23743600 | 1.24662900  | -0.96136600 |
| N | 0.28907600  | 0.03513900  | -0.83688400 |
| C | 2.29242900  | 3.74326900  | 0.05827200  |
| N | -1.52235700 | 1.39519000  | -1.41610600 |
| N | -2.39071600 | 0.33790700  | -1.51001800 |
| H | 2.99229700  | -4.27291600 | -0.03482600 |
| H | 5.19034900  | -3.39465000 | 0.82626400  |
| H | 5.54952600  | -0.94353600 | 1.08054300  |
| H | 1.17055600  | -2.62668300 | -0.63479200 |
| H | 2.57531900  | 3.78547300  | 1.12024800  |
| H | 3.21962300  | 3.83221400  | -0.52598100 |
| H | 1.62445100  | 4.57836000  | -0.17766700 |
| H | -2.85604600 | 0.30763200  | -2.41451800 |
| H | -1.86760600 | 2.35250300  | -1.40866500 |
| C | -3.36496500 | 0.25491700  | -0.42549000 |
| O | -2.67846000 | -0.19095100 | 0.70469300  |

## In3

O 1

|   |             |             |             |
|---|-------------|-------------|-------------|
| C | 3.34780100  | -3.03376800 | 0.10358200  |
| C | 4.64157100  | -2.41606500 | 0.02703000  |
| C | 4.77671600  | -1.05995900 | -0.05162600 |
| C | 3.60828400  | -0.23843100 | -0.05730300 |
| N | 2.36767600  | -0.89868700 | 0.01811700  |
| C | 2.22977500  | -2.26288200 | 0.09758500  |
| N | 3.48216900  | 1.07121700  | -0.12319700 |
| C | 2.12916800  | 1.28872100  | -0.09133200 |
| C | 1.40861600  | 0.08933700  | -0.00463400 |
| C | 1.33955700  | 2.46135300  | -0.12878300 |
| N | 0.02436100  | 2.34288300  | -0.08311100 |
| C | -0.54201000 | 1.11115300  | 0.00098000  |
| N | 0.09043000  | -0.05504300 | 0.04384100  |
| C | 1.96455800  | 3.81781300  | -0.21120800 |
| N | -1.91130400 | 1.14976200  | 0.04835100  |
| N | -2.65596800 | 0.02352600  | 0.07555100  |
| H | 3.25325100  | -4.11637400 | 0.16582300  |
| H | 5.52989800  | -3.04858500 | 0.03156600  |
| H | 5.74847500  | -0.57175700 | -0.11168100 |
| H | 1.20606200  | -2.63327000 | 0.15126300  |
| H | 2.54760400  | 4.01722400  | 0.70015800  |
| H | 2.66397000  | 3.86292200  | -1.05777400 |
| H | 1.19178300  | 4.58565100  | -0.32349500 |
| H | -2.32143000 | 2.07727500  | -0.02329300 |
| C | -3.92699200 | 0.12546400  | 0.07557300  |

|   |             |             |             |
|---|-------------|-------------|-------------|
| O | -4.58888800 | -1.04308200 | 0.24521200  |
| C | -5.83820500 | -1.26278500 | -0.40745200 |
| H | -5.81494000 | -2.31046200 | -0.73735900 |
| H | -5.91082000 | -0.64142600 | -1.31325300 |
| C | -7.00820300 | -1.03876200 | 0.52953100  |
| H | -7.94578800 | -1.32803700 | 0.03535200  |
| H | -6.88789500 | -1.65275400 | 1.43270000  |
| H | -7.09175700 | 0.01341300  | 0.83599100  |
| C | -4.70580900 | 1.41562000  | 0.05955000  |
| H | -4.20880100 | 2.13929200  | -0.60351300 |
| H | -5.69850800 | 1.25211600  | -0.37705100 |
| C | -4.84298100 | 1.98390100  | 1.47782800  |
| H | -3.85724200 | 2.19545700  | 1.91622700  |
| H | -5.42396400 | 2.91514400  | 1.46793000  |
| H | -5.35341700 | 1.26263200  | 2.13128400  |

**In4**

|     |             |             |             |
|-----|-------------|-------------|-------------|
| O 1 |             |             |             |
| C   | -2.67727200 | -2.49939600 | -0.31132400 |
| C   | -3.91285900 | -1.78178300 | -0.20168600 |
| C   | -3.91331700 | -0.42620700 | -0.04683200 |
| C   | -2.67848600 | 0.28248900  | -0.02029800 |
| N   | -1.48314300 | -0.46190500 | -0.20896300 |
| C   | -1.48797000 | -1.84440000 | -0.30482600 |
| N   | -2.43680600 | 1.56175000  | 0.16267800  |
| C   | -1.08097600 | 1.68092800  | 0.09301000  |
| C   | -0.47781600 | 0.45685200  | -0.16188900 |
| C   | -0.23709600 | 2.83621100  | 0.31901700  |
| N   | 1.05618600  | 2.72125100  | 0.32601200  |
| C   | 1.63376100  | 1.50106300  | 0.06895800  |
| N   | 0.87830500  | 0.36692900  | -0.30781100 |
| C   | -0.87980100 | 4.15965900  | 0.58211400  |
| N   | 2.89407500  | 1.24942900  | 0.11153600  |
| N   | 3.04143500  | -0.05393400 | -0.34460800 |
| H   | -2.67343300 | -3.58603200 | -0.38071400 |
| H   | -4.85344000 | -2.33220300 | -0.22082700 |
| H   | -4.82984600 | 0.15100400  | 0.06920300  |
| H   | -0.51689100 | -2.33468500 | -0.31507300 |
| H   | -1.49103700 | 4.45609700  | -0.28301000 |
| H   | -1.56077300 | 4.08054600  | 1.44184500  |
| H   | -0.11614000 | 4.91994100  | 0.77600600  |
| C   | 1.77640900  | -0.77667100 | -0.45394900 |
| O   | 1.55764100  | -1.74402300 | 0.53443700  |
| C   | 1.56577800  | -1.28972000 | 1.88332600  |
| H   | 0.67430300  | -0.66537700 | 2.07215000  |
| H   | 2.45449400  | -0.66103200 | 2.05998500  |
| C   | 1.57027700  | -2.50119500 | 2.78830200  |
| H   | 1.57088300  | -2.18789900 | 3.84051400  |
| H   | 0.67850800  | -3.11717900 | 2.60786200  |
| H   | 2.46283100  | -3.11366600 | 2.60246200  |

|   |            |             |             |
|---|------------|-------------|-------------|
| H | 3.79756000 | -0.56718100 | 0.10032700  |
| C | 1.68273700 | -1.50052700 | -1.79899100 |
| H | 0.76744400 | -2.10758000 | -1.83114700 |
| H | 2.52874100 | -2.20465900 | -1.81577900 |
| C | 1.73911000 | -0.55241500 | -2.98566900 |
| H | 1.75364800 | -1.11576900 | -3.92766500 |
| H | 0.86402500 | 0.11352400  | -3.00130700 |
| H | 2.64276200 | 0.07037600  | -2.93779400 |

**Product**

|     |             |             |             |
|-----|-------------|-------------|-------------|
| O 1 |             |             |             |
| C   | -4.45364400 | -1.75558700 | -0.63531400 |
| C   | -5.11681500 | -0.50463800 | -0.43811400 |
| C   | -4.38893200 | 0.62966800  | -0.23332500 |
| C   | -2.96759000 | 0.55995900  | -0.20469400 |
| N   | -2.34902200 | -0.70273300 | -0.35735300 |
| C   | -3.09891500 | -1.83891900 | -0.59888600 |
| N   | -2.09192300 | 1.53184400  | -0.06069000 |
| C   | -0.88036900 | 0.92618500  | -0.11136800 |
| C   | -1.00338400 | -0.45212200 | -0.27293400 |
| C   | 0.42210100  | 1.54088900  | -0.07531700 |
| N   | 1.48635200  | 0.80244000  | -0.19465100 |
| C   | 1.35431100  | -0.54079100 | -0.30909500 |
| N   | 0.13574400  | -1.23497100 | -0.33292700 |
| C   | 0.53041900  | 3.02170200  | 0.07628700  |
| N   | 2.33834500  | -1.40915700 | -0.37765200 |
| N   | 1.80921200  | -2.64223700 | -0.42417500 |
| H   | -5.02307400 | -2.66262600 | -0.83080900 |
| H   | -6.20545500 | -0.46367200 | -0.46582200 |
| H   | -4.84544700 | 1.60884800  | -0.09578300 |
| H   | -2.56117300 | -2.76323400 | -0.76948700 |
| H   | 0.00455500  | 3.52201700  | -0.74979100 |
| H   | 0.03863600  | 3.33855000  | 1.00721000  |
| H   | 1.58259000  | 3.32465100  | 0.08655200  |
| H   | 4.18774700  | -1.26625100 | -0.35952700 |
| C   | 0.50084000  | -2.56937800 | -0.39283500 |
| O   | 5.14854100  | -1.24262700 | -0.17237600 |
| C   | 5.29999300  | -0.50728400 | 1.01455300  |
| H   | 6.32445400  | -0.67841000 | 1.38366900  |
| H   | 4.61669300  | -0.87930500 | 1.80273400  |
| C   | 5.06907100  | 0.98224200  | 0.80685000  |
| H   | 5.22116400  | 1.54421400  | 1.74028400  |
| H   | 5.76532500  | 1.37079500  | 0.04896000  |
| H   | 4.04076200  | 1.15946200  | 0.45662300  |
| C   | -0.37278400 | -3.77468200 | -0.29818600 |
| H   | -1.08711300 | -3.81216100 | -1.13209800 |
| H   | 0.30644700  | -4.62201500 | -0.45597200 |
| C   | -1.05255300 | -3.90585400 | 1.06768100  |
| H   | -1.70435400 | -4.78910600 | 1.08839400  |
| H   | -0.29436800 | -4.01461800 | 1.85471600  |



H -1.66556200 -3.02743800 1.31822600

H 4.37344300 3.64055600 -0.12070900

**TS1 (v = 129.66 i(cm-1))**

H 2.71645000 2.99252800 0.02609600

0 1

C 0.93752700 -2.16730500 0.91301300

C -5.80223100 -1.70075800 0.06706700

H 0.33896200 -1.93244500 1.80382400

C -6.41675700 -0.70656300 0.90187600

H 0.25785600 -2.22250100 0.05083900

C -5.75314300 0.43308300 1.25290800

H 1.40743900 -3.14988100 1.06077300

C -4.42103300 0.64276200 0.78090100

C 4.65566100 -1.14067700 -1.84562800

N -3.86949600 -0.36479000 -0.03405700

H 5.58992900 -0.56383400 -1.84387400

C -4.53627300 -1.51263500 -0.38724400

H 4.90510600 -2.17127400 -1.56045600

N -3.59231100 1.64498300 0.97991500

C 3.99294900 -1.09681000 -3.21955000

C -2.46104000 1.30046700 0.28287300

H 3.81967600 -0.05995800 -3.54069500

C -2.59859800 0.05947100 -0.35691000

H 4.62799000 -1.58562400 -3.96898500

C -1.21412000 1.93396300 0.09162400

H 3.02320200 -1.61158600 -3.20498700

N -0.30162900 1.33506600 -0.65476400

**TS2 (v = 206.50 i(cm-1))**

C -0.56648400 0.12641900 -1.22100600

0 1

N -1.70043900 -0.56277600 -1.10710800

C 2.89203300 -3.18579500 0.20780200

C -0.89279000 3.24643500 0.73594000

C 4.22882800 -2.79331500 0.55317600

N 0.46103300 -0.36346400 -1.97498500

C 4.58608600 -1.47787200 0.62633600

N 0.46534000 -1.67164100 -2.43277800

C 3.61100600 -0.47139100 0.35086900

H -6.34226400 -2.60589000 -0.20505100

N 2.31995900 -0.91465100 0.00997000

H -7.43381700 -0.87164400 1.25915500

C 1.95683300 -2.23757200 -0.05849600

H -6.19988400 1.19888800 1.88559100

N 3.71088300 0.84255600 0.35965300

H -3.98297100 -2.20473200 -1.02200200

C 2.45946100 1.28489500 0.01886000

H -1.80978500 3.77569000 1.02048200

C 1.57418900 0.22195500 -0.20582000

H -0.30038900 3.07073500 1.64716700

C 1.91079300 2.57512000 -0.16765200

H -0.29071700 3.86526900 0.05922100

N 0.63313400 2.68266700 -0.49231400

H 0.61681400 -1.68846300 -3.43976600

C -0.11496300 1.56497200 -0.64675000

H 1.22517800 -2.18404300 -1.98220700

N 0.29615200 0.30941700 -0.55259200

H 1.33755700 0.15005500 -1.88629200

C 2.74861100 3.80500500 -0.02003600

C 3.74652000 -0.58318700 -0.77757300

N -1.44001300 1.80674400 -0.94269200

O 2.81072800 -1.46942000 -0.39875300

N -2.28059300 0.76039900 -1.24521400

O 3.19659100 0.62904400 -1.01637100

H 2.61878500 -4.23836200 0.15889000

O 4.76502800 -0.26858600 0.62288000

H 4.96885800 -3.56689900 0.76093100

C 5.37730700 -1.43760600 1.08253300

H 5.59377600 -1.15941300 0.88960700

H 4.66775300 -2.28982500 1.07161500

H 0.91709900 -2.43099900 -0.32265400

H 6.23346800 -1.73008400 0.44107200

H 3.31343200 3.77181400 0.92175000

C 4.04792700 1.77178900 -1.14866800

H 3.48427800 3.85412500 -0.83694600

H 3.81503200 2.23318200 -2.11924400

H 2.11737700 4.69952800 -0.04966500

H 5.09664500 1.44977500 -1.15168100

H -1.77842800 -0.05109900 -1.60728400

C 1.98624400 -1.09737300 0.72061600

H -1.61071700 2.67379100 -1.44321600

H 1.53388200 -0.11463800 0.52657800

C -3.19525800 0.38771600 -0.25020800

H 2.64339700 -1.00499800 1.59700000

O -2.26870700 -0.24589900 1.14411500

C 5.86835400 -1.21100400 2.50315100

O -3.81182600 -0.72592400 -0.69300900

H 5.02396200 -0.97769800 3.16797700

C -2.21940500 0.47010800 2.33676800

H 6.38112600 -2.10362900 2.88848800

H -2.02048000 -0.26385000 3.14248900

H 6.57077100 -0.36573000 2.53211400

H -3.19312200 0.92741400 2.60324600

C 3.78154300 2.72258700 -0.00241900

C -1.13651900 1.54309500 2.38783600

H 4.05393200 2.23424900 0.94203700

H -1.32860500 2.34203500 1.65710600

H -1.08162300 1.99449100 3.39009500

|   |             |             |             |
|---|-------------|-------------|-------------|
| H | -0.15537200 | 1.10130500  | 2.15288700  |
| C | -4.78712500 | -1.32462700 | 0.15547400  |
| H | -5.70349200 | -0.71155000 | 0.15525900  |
| H | -4.38249300 | -1.35844000 | 1.17698900  |
| C | -5.07114200 | -2.71128100 | -0.37326000 |
| H | -5.82890300 | -3.20267100 | 0.25091800  |
| H | -5.44681000 | -2.66322800 | -1.40453000 |
| H | -4.15695400 | -3.32008600 | -0.36099300 |
| C | -4.06257600 | 1.50240700  | 0.27398300  |
| H | -3.41022100 | 2.29110800  | 0.67073700  |
| H | -4.65918900 | 1.12169800  | 1.11292000  |
| C | -4.96987100 | 2.04858800  | -0.82697300 |
| H | -4.37714900 | 2.48174200  | -1.64410000 |
| H | -5.59483600 | 1.25083800  | -1.25343900 |
| H | -5.63226600 | 2.82734600  | -0.42778200 |

**TS3 (v = 167.11 i(cm-1))**

|     |             |             |             |
|-----|-------------|-------------|-------------|
| O 1 |             |             |             |
| C   | -1.77450600 | -2.69640500 | 1.65134400  |
| C   | -3.17197400 | -2.36034200 | 1.66357000  |
| C   | -3.62426100 | -1.18776000 | 1.13022000  |
| C   | -2.69418800 | -0.27265000 | 0.54885900  |
| N   | -1.33349800 | -0.65383600 | 0.57250300  |
| C   | -0.87655400 | -1.83730500 | 1.10497900  |
| N   | -2.87383500 | 0.89637300  | -0.02572400 |
| C   | -1.61327000 | 1.30493100  | -0.38951200 |
| C   | -0.64528200 | 0.36635500  | -0.02833200 |
| C   | -1.12310400 | 2.44970200  | -1.08376700 |
| N   | 0.16226200  | 2.58218800  | -1.31497500 |
| C   | 1.04598500  | 1.61373200  | -0.88858500 |
| N   | 0.65989000  | 0.47296900  | -0.25609300 |
| C   | -2.07436400 | 3.50500300  | -1.55799600 |
| N   | 2.34143300  | 1.79595300  | -1.14142300 |
| N   | 3.04887000  | 0.77842100  | -0.46602000 |
| H   | -1.42610500 | -3.63720400 | 2.07435000  |
| H   | -3.87975700 | -3.06206100 | 2.10601600  |
| H   | -4.67991100 | -0.91845800 | 1.12769600  |
| H   | 0.20047200  | -2.00281400 | 1.04232100  |
| H   | -1.53201100 | 4.29025800  | -2.09537200 |
| H   | -2.83509000 | 3.05990500  | -2.21557200 |
| H   | -2.60721700 | 3.94396800  | -0.70166200 |
| H   | 3.44416600  | 1.09776300  | 0.41726800  |
| C   | 2.50055800  | -0.44482300 | -0.45820500 |
| O   | 2.72633900  | -1.27723600 | 0.52896200  |
| C   | 3.04012800  | -0.77615700 | 1.83986600  |
| H   | 2.31493700  | 0.01842900  | 2.07944100  |
| H   | 4.05473100  | -0.35091500 | 1.82626800  |
| C   | 2.95700900  | -1.93058100 | 2.80798500  |
| H   | 3.22672200  | -1.58181000 | 3.81288100  |
| H   | 1.93940100  | -2.34122600 | 2.84489800  |

|   |            |             |             |
|---|------------|-------------|-------------|
| H | 3.65332200 | -2.72740500 | 2.51586500  |
| C | 2.17935700 | -1.13452200 | -1.75269400 |
| H | 1.33706600 | -1.81469700 | -1.57305700 |
| H | 1.86968800 | -0.37466400 | -2.47937600 |
| C | 3.40696700 | -1.89761400 | -2.25364100 |
| H | 3.71420200 | -2.66560500 | -1.53170400 |
| H | 3.17569300 | -2.39053300 | -3.20638600 |
| H | 4.25075100 | -1.21294400 | -2.41522600 |

**TS4 (v = 241.16 i(cm-1))**

|     |             |             |             |
|-----|-------------|-------------|-------------|
| O 1 |             |             |             |
| C   | -0.03157100 | 3.67389100  | -0.57764400 |
| C   | 1.32874900  | 4.07885000  | -0.38581100 |
| C   | 2.29609900  | 3.15381600  | -0.11926600 |
| C   | 1.95403200  | 1.77243000  | -0.07497100 |
| N   | 0.61839700  | 1.41436200  | -0.38306100 |
| C   | -0.37770900 | 2.36045700  | -0.55893500 |
| N   | 2.69234600  | 0.72297500  | 0.22118300  |
| C   | 1.85649100  | -0.34386600 | 0.09698300  |
| C   | 0.59122800  | 0.05446500  | -0.31117900 |
| C   | 2.07804700  | -1.73228700 | 0.44219300  |
| N   | 1.10297000  | -2.59154500 | 0.38897700  |
| C   | -0.11752200 | -2.19560800 | -0.07705600 |
| N   | -0.37986000 | -0.88626200 | -0.53556100 |
| C   | 3.43231000  | -2.15357800 | 0.91052900  |
| N   | -1.15892900 | -2.95025400 | -0.22222400 |
| N   | -2.09805600 | -2.13301200 | -0.79009500 |
| H   | -0.81538800 | 4.41868500  | -0.70698900 |
| H   | 1.58001100  | 5.13907100  | -0.41954100 |
| H   | 3.33243900  | 3.42522300  | 0.07768200  |
| H   | -1.39609300 | 1.97179600  | -0.57265800 |
| H   | 3.73505400  | -1.54308700 | 1.77344400  |
| H   | 3.42636200  | -3.21390900 | 1.18299100  |
| H   | 4.17263900  | -1.97544100 | 0.11687100  |
| C   | -1.71221800 | -0.82977800 | -0.96204800 |
| O   | -2.42411000 | 0.28981400  | 0.31283400  |
| C   | -3.78930500 | 0.09861000  | 0.46394600  |
| H   | -4.06020200 | -0.97133900 | 0.32166400  |
| H   | -4.37994000 | 0.66788200  | -0.28696400 |
| C   | -4.23050000 | 0.51758800  | 1.86065200  |
| H   | -5.30920800 | 0.35733400  | 2.00366800  |
| H   | -3.68411200 | -0.06469200 | 2.61666100  |
| H   | -4.01236300 | 1.58253700  | 2.02786200  |
| H   | -2.93403100 | -2.54152400 | -1.18802300 |
| C   | -2.12564000 | -0.13556500 | -2.23569400 |
| H   | -3.22279200 | -0.19874900 | -2.29303300 |
| H   | -1.87719300 | 0.92928100  | -2.17444000 |
| C   | -1.47280600 | -0.77442600 | -3.45881100 |
| H   | -1.74574200 | -1.83487100 | -3.54786300 |
| H   | -1.79308200 | -0.25896700 | -4.37313800 |

H -0.37690900 -0.70825500 -3.39566500

**Route 2**

**Et:**

**In1**

O 1

|   |             |             |             |
|---|-------------|-------------|-------------|
| C | 6.47689600  | -2.15741000 | -1.27308600 |
| C | 7.44161000  | -1.25391300 | -0.71083900 |
| C | 7.05523700  | -0.11895800 | -0.05859300 |
| C | 5.66315400  | 0.17870000  | 0.06802600  |
| N | 4.76385600  | -0.74381600 | -0.50077000 |
| C | 5.15127100  | -1.88569700 | -1.15793700 |
| N | 5.05420600  | 1.19610400  | 0.63822400  |
| C | 3.71636200  | 0.94899700  | 0.44612500  |
| C | 3.50185300  | -0.24607700 | -0.25656800 |
| C | 2.54354600  | 1.64789700  | 0.80181600  |
| N | 1.36446400  | 1.14819000  | 0.46494900  |
| C | 1.29711500  | -0.02226500 | -0.21300200 |
| N | 2.33815900  | -0.76721300 | -0.60696500 |
| C | 2.61159500  | 2.94066900  | 1.55385000  |
| N | 0.07075800  | -0.52194200 | -0.53408000 |
| N | -1.11176800 | 0.15003500  | -0.29439500 |
| H | 6.79723800  | -3.05880400 | -1.79255800 |
| H | 8.50274400  | -1.48451100 | -0.81170000 |
| H | 7.77125000  | 0.57952000  | 0.37260100  |
| H | 4.34361700  | -2.50485200 | -1.54836600 |
| H | 3.06059800  | 2.77737900  | 2.54487500  |
| H | 3.25611300  | 3.65561500  | 1.02279300  |
| H | 1.60768800  | 3.36200600  | 1.67329500  |
| H | -1.55788600 | 0.44282800  | -1.16350500 |
| H | -1.77935200 | -0.44978100 | 0.19256800  |
| H | 0.08282700  | -1.36478100 | -1.10077100 |
| C | -4.38070600 | -0.75670800 | -0.61510000 |
| O | -3.92027200 | 0.53506500  | -0.85346300 |
| O | -3.71017000 | -1.25513600 | 0.51133200  |
| O | -5.74251900 | -0.76306600 | -0.32105200 |
| C | -6.61321000 | -0.29760000 | -1.34030000 |
| H | -6.18004200 | 0.59821100  | -1.81513400 |
| H | -6.72852200 | -1.07088200 | -2.11923300 |
| C | -4.39373000 | -2.04382600 | 1.48087700  |
| H | -3.64599900 | -2.75855600 | 1.85423000  |
| H | -5.19935400 | -2.61596200 | 1.00251600  |
| C | -4.19321600 | 1.49043700  | 0.16420100  |
| H | -3.91480500 | 1.06994300  | 1.14317600  |
| H | -5.27475700 | 1.70753000  | 0.18651100  |
| C | -7.94894200 | 0.01927600  | -0.70511300 |
| H | -7.83679000 | 0.80540300  | 0.05484200  |

|   |             |             |             |
|---|-------------|-------------|-------------|
| H | -8.65912500 | 0.36713800  | -1.46685300 |
| H | -8.36605100 | -0.87538700 | -0.22261600 |
| C | -4.93669500 | -1.20112000 | 2.61828500  |
| H | -5.69951400 | -0.50444800 | 2.24552500  |
| H | -5.39012300 | -1.84653400 | 3.38424700  |
| H | -4.12802000 | -0.62415700 | 3.09027900  |
| C | -3.39364900 | 2.73970900  | -0.13529400 |
| H | -3.60882600 | 3.51508700  | 0.61231100  |
| H | -2.31892800 | 2.51318100  | -0.11137400 |
| H | -3.65178600 | 3.13381800  | -1.12836000 |
| C | -4.01870800 | -1.57759400 | -1.85007600 |
| H | -2.92632100 | -1.50382200 | -1.95410900 |
| H | -4.45779600 | -1.09181700 | -2.73365800 |
| C | -4.45510700 | -3.03077300 | -1.74261900 |
| H | -5.54080800 | -3.10870400 | -1.58270400 |
| H | -4.20582200 | -3.58030000 | -2.65979600 |
| H | -3.95086300 | -3.52994200 | -0.90304200 |

**In2**

O 1

|   |             |             |             |
|---|-------------|-------------|-------------|
| C | -5.16145400 | -1.47662600 | -0.64878100 |
| C | -5.86841800 | -0.42574800 | 0.02837800  |
| C | -5.21470100 | 0.66558800  | 0.52304900  |
| C | -3.79792900 | 0.76617600  | 0.36466200  |
| N | -3.15898600 | -0.29322000 | -0.30693200 |
| C | -3.81522200 | -1.39195600 | -0.80515000 |
| N | -2.95872700 | 1.70468500  | 0.74848800  |
| C | -1.72970800 | 1.26260600  | 0.32450700  |
| C | -1.81898500 | 0.02645200  | -0.33302700 |
| C | -0.42766700 | 1.79941300  | 0.40902100  |
| N | 0.58638700  | 1.12063000  | -0.10847800 |
| C | 0.36134400  | -0.07110000 | -0.70388500 |
| N | -0.82364500 | -0.66976500 | -0.85639000 |
| C | -0.17754900 | 3.11889700  | 1.06989000  |
| N | 1.42486200  | -0.76591500 | -1.21124400 |
| N | 2.72675200  | -0.35810000 | -1.08674400 |
| H | -5.69430600 | -2.34190300 | -1.03902200 |
| H | -6.94949700 | -0.50768900 | 0.14625000  |
| H | -5.73245900 | 1.47286100  | 1.03945500  |
| H | -3.18907300 | -2.13296800 | -1.30209600 |
| H | -0.73865200 | 3.91207500  | 0.55436200  |
| H | -0.53620100 | 3.09487200  | 2.10909600  |
| H | 0.89162400  | 3.35622000  | 1.05424600  |
| H | 3.17401100  | -0.25271300 | -1.99612400 |
| H | 1.19383300  | -1.64646300 | -1.66461200 |
| C | 3.57279700  | -1.19743600 | -0.22655500 |
| O | 3.18415600  | -0.98053800 | 1.09459400  |
| O | 4.87535800  | -0.73200200 | -0.42182000 |
| C | 2.55396600  | -1.94699600 | 1.91950000  |
| H | 2.83530200  | -1.66458500 | 2.94430500  |

|   |            |             |             |
|---|------------|-------------|-------------|
| H | 2.96135800 | -2.95306600 | 1.74749500  |
| C | 1.04169600 | -1.95773100 | 1.79276700  |
| H | 0.71340500 | -2.35360200 | 0.82241800  |
| H | 0.61012200 | -2.58625700 | 2.58481300  |
| H | 0.64308900 | -0.93794500 | 1.89981400  |
| C | 5.33646300 | 0.37482300  | 0.34149700  |
| H | 6.41362300 | 0.41735200  | 0.12805200  |
| H | 5.21500800 | 0.15649200  | 1.41240100  |
| C | 4.68146200 | 1.70054900  | -0.00436700 |
| H | 5.18169900 | 2.50901400  | 0.54889900  |
| H | 4.77438600 | 1.90726300  | -1.08065800 |
| H | 3.61480300 | 1.68934200  | 0.24962800  |
| C | 3.57416000 | -2.67085000 | -0.65904700 |
| H | 3.63199400 | -2.67281400 | -1.75829400 |
| H | 2.60503700 | -3.12215800 | -0.39976800 |
| C | 4.73563700 | -3.48512100 | -0.09857500 |
| H | 4.62101800 | -4.54759400 | -0.35270600 |
| H | 5.68371400 | -3.12572500 | -0.51649500 |
| H | 4.80959500 | -3.40306700 | 0.99484000  |

### In3

|     |             |             |             |
|-----|-------------|-------------|-------------|
| O 1 |             |             |             |
| C   | -4.70212100 | -2.26612800 | -0.27573400 |
| C   | -5.63760500 | -1.17931000 | -0.20226100 |
| C   | -5.21632500 | 0.11410300  | -0.09020400 |
| C   | -3.81574200 | 0.39363600  | -0.04376500 |
| N   | -2.94628300 | -0.71094300 | -0.11857700 |
| C   | -3.36874400 | -2.01276800 | -0.23250000 |
| N   | -3.17522500 | 1.53887100  | 0.06284300  |
| C   | -1.84742800 | 1.19309700  | 0.05967500  |
| C   | -1.67072700 | -0.19518500 | -0.05141100 |
| C   | -0.65547100 | 1.94255900  | 0.14659700  |
| N   | 0.50861700  | 1.30897300  | 0.11933000  |
| C   | 0.53352300  | -0.03528900 | 0.00831100  |
| N   | -0.52126700 | -0.84906900 | -0.08281200 |
| C   | -0.68480300 | 3.43362200  | 0.26772400  |
| N   | 1.75050800  | -0.66825300 | -0.00681900 |
| N   | 2.91949400  | 0.00792300  | 0.03182200  |
| H   | -5.05137000 | -3.29311300 | -0.36577300 |
| H   | -6.70536200 | -1.39836100 | -0.23729900 |
| H   | -5.90974500 | 0.95199000  | -0.03356800 |
| H   | -2.58105700 | -2.76452100 | -0.28220800 |
| H   | -1.15946900 | 3.87498700  | -0.62096000 |
| H   | -1.28925000 | 3.73102800  | 1.13670600  |
| H   | 0.33269300  | 3.82495200  | 0.37144600  |
| H   | 1.71194800  | -1.67921800 | -0.10810900 |
| C   | 4.01099200  | -0.65116000 | 0.01629300  |
| O   | 5.12502900  | 0.09838100  | 0.19332200  |
| C   | 6.35380300  | -0.27772100 | -0.42354500 |
| H   | 6.82404600  | 0.66555000  | -0.73324500 |

|   |            |             |             |
|---|------------|-------------|-------------|
| H | 6.16110500 | -0.85729200 | -1.33947100 |
| C | 7.26270900 | -1.02010600 | 0.53593400  |
| H | 8.24726100 | -1.17805300 | 0.07465900  |
| H | 7.39974000 | -0.43083100 | 1.45305800  |
| H | 6.85289700 | -2.00126600 | 0.81409100  |
| C | 4.12922000 | -2.15348300 | -0.02650200 |
| H | 3.36873400 | -2.56362300 | -0.70757200 |
| H | 5.09387600 | -2.44627300 | -0.45774000 |
| C | 3.97880500 | -2.75211500 | 1.37802200  |
| H | 2.99894300 | -2.50593900 | 1.81129700  |
| H | 4.07661000 | -3.84494700 | 1.34554500  |
| H | 4.75211400 | -2.35373600 | 2.04959900  |

### In4

|     |             |             |             |
|-----|-------------|-------------|-------------|
| O 1 |             |             |             |
| C   | 3.38777600  | -2.74738500 | 1.11707600  |
| C   | 4.34267700  | -2.22414400 | 2.06065800  |
| C   | 4.30966600  | -0.92436300 | 2.46575300  |
| C   | 3.30036600  | -0.04994400 | 1.94252100  |
| N   | 2.39163300  | -0.62055500 | 1.02479300  |
| C   | 2.42736500  | -1.93262300 | 0.61590700  |
| N   | 3.07338400  | 1.21526300  | 2.17485200  |
| C   | 1.97271100  | 1.52552700  | 1.39640000  |
| C   | 1.51874600  | 0.38478800  | 0.65305300  |
| C   | 1.28856900  | 2.70818400  | 1.21755200  |
| N   | 0.21163300  | 2.63514000  | 0.38789600  |
| C   | -0.13667000 | 1.47149800  | -0.36112900 |
| N   | 0.53817600  | 0.29716100  | -0.19282200 |
| C   | 1.69457300  | 3.98129900  | 1.87732500  |
| N   | -1.11583200 | 1.68319900  | -1.16561700 |
| N   | -1.56180400 | 2.98915300  | -0.89684600 |
| H   | 3.43079200  | -3.78898500 | 0.80470600  |
| H   | 5.10856300  | -2.89234500 | 2.45650400  |
| H   | 5.02453600  | -0.51502600 | 3.17811500  |
| H   | 1.65827400  | -2.22474700 | -0.09946000 |
| H   | 2.65800700  | 3.82342700  | 2.37330600  |
| H   | 1.78017900  | 4.78502300  | 1.13365600  |
| H   | 0.95532200  | 4.28468200  | 2.63301100  |
| H   | -1.85759900 | 3.44988900  | -1.75210100 |
| C   | -0.54924500 | 3.75398200  | -0.17368100 |
| O   | 0.37364800  | 4.42935500  | -1.00167900 |
| C   | 0.07907300  | 5.73447400  | -1.47880900 |
| H   | 1.00259700  | 6.05602300  | -1.97811400 |
| H   | -0.09077800 | 6.42666600  | -0.63852400 |
| C   | -1.07827700 | 5.79101300  | -2.46236300 |
| H   | -1.13596900 | 6.79450100  | -2.90572000 |
| H   | -0.92869500 | 5.06448400  | -3.27421100 |
| H   | -2.04686600 | 5.59293400  | -1.97941600 |
| C   | -1.21977000 | 4.67042700  | 0.85373900  |
| H   | -0.48448100 | 5.37243800  | 1.26887300  |

|   |             |            |            |
|---|-------------|------------|------------|
| H | -1.95149800 | 5.27575900 | 0.29663500 |
| C | -1.93509700 | 3.90242600 | 1.95561700 |
| H | -1.22823600 | 3.34026700 | 2.58350400 |
| H | -2.49058200 | 4.59198000 | 2.60433600 |
| H | -2.64291900 | 3.18583000 | 1.51780800 |

**TS1 (v = 159.81 i(cm-1))**

0 1

|   |             |             |             |
|---|-------------|-------------|-------------|
| C | -2.93657600 | 2.27487900  | 2.98019000  |
| C | -3.86613900 | 2.70610600  | 1.97462900  |
| C | -3.95217300 | 2.07220100  | 0.76838700  |
| C | -3.09550400 | 0.96190300  | 0.49746600  |
| N | -2.21078700 | 0.57983700  | 1.52254000  |
| C | -2.12301800 | 1.21477900  | 2.73679400  |
| N | -2.96963500 | 0.22093600  | -0.58442400 |
| C | -1.96711900 | -0.66601400 | -0.28042500 |
| C | -1.47310000 | -0.46661500 | 1.01588500  |
| C | -1.33634700 | -1.70109000 | -1.00374300 |
| N | -0.32885500 | -2.35500100 | -0.44622800 |
| C | 0.07583200  | -2.03133700 | 0.80082000  |
| N | -0.47279800 | -1.11042900 | 1.59476400  |
| C | -1.81098000 | -2.08968400 | -2.36940500 |
| N | 1.12654700  | -2.72887100 | 1.35467900  |
| N | 2.11320400  | -3.25007200 | 0.52450800  |
| H | -2.87874800 | 2.78731900  | 3.93876400  |
| H | -4.51352900 | 3.55793700  | 2.18583400  |
| H | -4.64804500 | 2.38610400  | -0.00836300 |
| H | -1.39069900 | 0.80855700  | 3.43511600  |
| H | -2.02473200 | -1.19662000 | -2.97263600 |
| H | -1.06650400 | -2.71981700 | -2.86865400 |
| H | -2.75216600 | -2.65494800 | -2.28472400 |
| H | 2.86729700  | -2.56880600 | 0.41408000  |
| H | 2.49265100  | -4.09600700 | 0.94202500  |
| H | 1.43158000  | -2.29761500 | 2.22548100  |
| C | 1.90738200  | 0.81852700  | 0.08628800  |
| O | 1.29680700  | 0.36257800  | -1.00816900 |
| O | 2.51546800  | -0.17741400 | 0.77106000  |
| O | 3.31481200  | 1.72737500  | -0.45291200 |
| C | 2.99042000  | 2.76455400  | -1.32528200 |
| H | 2.18833400  | 2.46009000  | -2.02767800 |
| H | 2.61364900  | 3.65669300  | -0.78076600 |
| C | 3.17878100  | 0.17551600  | 1.98373600  |
| H | 2.42939900  | 0.29684400  | 2.78346700  |
| H | 3.69428900  | 1.13384700  | 1.83199500  |
| C | 2.03402900  | -0.55356500 | -1.83285100 |
| H | 1.93037600  | -1.56400100 | -1.41247700 |
| H | 3.09056800  | -0.25306700 | -1.80830900 |
| C | 4.22628600  | 3.15426200  | -2.12200800 |
| H | 4.57526000  | 2.30278800  | -2.72456000 |
| H | 4.01229100  | 3.99591700  | -2.79625500 |
| H | 5.03937100  | 3.45025600  | -1.44349700 |
| C | 4.16277800  | -0.92091600 | 2.32228600  |
| H | 4.91078900  | -1.02328200 | 1.52401000  |
| H | 4.68159800  | -0.68440400 | 3.26035400  |
| H | 3.65560600  | -1.88846000 | 2.44873800  |
| C | 1.45915000  | -0.48025500 | -3.22777800 |

**Product**

0 1

|   |             |             |             |
|---|-------------|-------------|-------------|
| C | 3.22685200  | -2.90950800 | 1.40321600  |
| C | 3.86809500  | -2.57143700 | 2.64384800  |
| C | 3.82505400  | -1.30650300 | 3.15251000  |
| C | 3.12360500  | -0.28847300 | 2.43234100  |
| N | 2.51457800  | -0.67905600 | 1.22784400  |
| C | 2.55846400  | -1.95156000 | 0.71349800  |
| N | 2.95274100  | 0.98154600  | 2.71703800  |
| C | 2.20033100  | 1.48003300  | 1.67852400  |
| C | 1.90747400  | 0.45198200  | 0.71356700  |
| C | 1.73766500  | 2.75193000  | 1.44012600  |
| N | 1.00062900  | 2.88036800  | 0.27540500  |
| C | 0.77938900  | 1.80429100  | -0.61409100 |
| N | 1.24440000  | 0.55975800  | -0.39475500 |
| C | 2.04710900  | 3.90237500  | 2.33294800  |
| N | 0.07855500  | 2.22269100  | -1.64476400 |
| N | -0.16786100 | 3.53023200  | -1.44908100 |
| H | 3.27349100  | -3.92390200 | 1.01225300  |
| H | 4.40258100  | -3.35121700 | 3.18791800  |
| H | 4.30782500  | -1.03437000 | 4.08962000  |
| H | 2.04071700  | -2.09812300 | -0.23450400 |
| H | 2.57422000  | 3.51296800  | 3.21051100  |
| H | 2.70049300  | 4.62445800  | 1.82188300  |
| H | 1.14085200  | 4.42674400  | 2.66194000  |
| H | -1.01014100 | 4.21218300  | -2.94951200 |
| C | 0.36332200  | 3.94954100  | -0.32512900 |
| O | -1.31923700 | 4.66932100  | -3.75808200 |
| C | -1.18956000 | 6.04144600  | -3.49291400 |
| H | -1.26100200 | 6.57818700  | -4.45261700 |
| H | -0.18724600 | 6.27360800  | -3.08085600 |
| C | -2.26390000 | 6.54804700  | -2.54162800 |
| H | -2.15516000 | 7.62462100  | -2.34503500 |
| H | -3.26226400 | 6.36692900  | -2.96542200 |
| H | -2.20428600 | 6.01382200  | -1.58068400 |
| C | 0.16673600  | 5.32732200  | 0.22044100  |
| H | 1.08302700  | 5.69817900  | 0.69391500  |
| H | -0.01370700 | 5.96974200  | -0.65256500 |
| C | -1.02578900 | 5.41704900  | 1.17743800  |
| H | -1.15441300 | 6.44840100  | 1.53169700  |
| H | -1.94871600 | 5.10653100  | 0.66783600  |
| H | -0.89786400 | 4.76684500  | 2.05439600  |

|   |             |             |             |
|---|-------------|-------------|-------------|
| H | 1.97302700  | -1.19769300 | -3.88167800 |
| H | 0.38905200  | -0.72910500 | -3.21802900 |
| H | 1.58041300  | 0.52683600  | -3.65090200 |
| C | 1.04526000  | 1.77737100  | 0.88843300  |
| H | 0.58569600  | 1.17237300  | 1.68478400  |
| H | 1.71311900  | 2.49786200  | 1.38029400  |
| C | -0.04304300 | 2.49074900  | 0.09197200  |
| H | -0.65735800 | 1.77266800  | -0.46868500 |
| H | -0.69793100 | 3.04782500  | 0.77856500  |
| H | 0.37694200  | 3.20355400  | -0.62885900 |

|   |            |             |             |
|---|------------|-------------|-------------|
| H | 5.14525600 | -0.17161400 | 1.28852500  |
| C | 6.49491300 | 0.90370300  | -0.02699600 |
| H | 7.35738200 | 0.85802100  | 0.65075800  |
| H | 6.86089100 | 0.84573200  | -1.06129700 |
| H | 5.98958500 | 1.86890900  | 0.11236100  |
| C | 3.53577000 | -2.32650600 | -0.07516900 |
| H | 2.56114900 | -2.74796900 | 0.20311000  |
| H | 4.19288000 | -2.42348000 | 0.79845100  |
| C | 4.12468700 | -3.06443000 | -1.27581700 |
| H | 3.44228800 | -3.02095200 | -2.13553700 |
| H | 5.07947900 | -2.61502400 | -1.58438500 |
| H | 4.30454900 | -4.11849300 | -1.02859100 |

**TS2 (v = 212.40 i(cm-1))**

0 1

|   |             |             |             |
|---|-------------|-------------|-------------|
| C | -5.37201600 | -1.69517800 | -0.13322800 |
| C | -6.03764100 | -0.52512000 | 0.36598200  |
| C | -5.36189300 | 0.64260400  | 0.57285300  |
| C | -3.96342400 | 0.70315900  | 0.28630900  |
| N | -3.36510500 | -0.47330700 | -0.20156200 |
| C | -4.04300300 | -1.64947700 | -0.40865400 |
| N | -3.10950300 | 1.69856400  | 0.40316100  |
| C | -1.91127400 | 1.17543100  | -0.01171900 |
| C | -2.03443800 | -0.17150400 | -0.39257000 |
| C | -0.62238200 | 1.72647600  | -0.16202700 |
| N | 0.35760100  | 0.94519600  | -0.59724300 |
| C | 0.10958800  | -0.34896700 | -0.87477500 |
| N | -1.06955100 | -0.96528700 | -0.82794900 |
| C | -0.34656100 | 3.16395200  | 0.14504900  |
| N | 1.17958300  | -1.12742300 | -1.26348400 |
| N | 2.43434900  | -0.58045400 | -1.40783900 |
| H | -5.92168400 | -2.62086100 | -0.29360900 |
| H | -7.10516600 | -0.57710900 | 0.58262900  |
| H | -5.84787200 | 1.54040000  | 0.95224700  |
| H | -3.44707800 | -2.47978500 | -0.78737100 |
| H | -0.99315500 | 3.81275800  | -0.46323600 |
| H | -0.57787500 | 3.37486400  | 1.19938700  |
| H | 0.70479000  | 3.39765800  | -0.05368900 |
| H | 2.39557700  | 0.42143500  | -1.59791300 |
| H | 0.95372400  | -1.89560000 | -1.88756800 |
| C | 3.35084100  | -0.86311000 | -0.38412400 |
| O | 2.75910800  | -0.08558400 | 1.11567800  |
| O | 4.45622300  | -0.13807400 | -0.64724500 |
| C | 2.31040000  | -0.86419900 | 2.17872800  |
| H | 2.42986900  | -0.25338900 | 3.09534600  |
| H | 2.93945800  | -1.76066200 | 2.34965000  |
| C | 0.85038600  | -1.29312500 | 2.07635800  |
| H | 0.69055300  | -1.97540200 | 1.22921000  |
| H | 0.52781500  | -1.80182200 | 2.99749300  |
| H | 0.20762500  | -0.41169100 | 1.92360100  |
| C | 5.54479900  | -0.23425100 | 0.26632500  |
| H | 6.04927100  | -1.20628400 | 0.13926500  |

**TS3 (v = 209.72 i(cm-1))**

0 1

|   |             |             |             |
|---|-------------|-------------|-------------|
| C | 4.56069400  | -0.93002100 | 0.81374100  |
| C | 5.05647400  | 0.28492400  | 0.22498500  |
| C | 4.22884900  | 1.14059600  | -0.44140000 |
| C | 2.83788900  | 0.82591100  | -0.55923100 |
| N | 2.40937800  | -0.37694300 | 0.04148900  |
| C | 3.24293200  | -1.23900500 | 0.71024200  |
| N | 1.85987500  | 1.47534700  | -1.14532700 |
| C | 0.74709900  | 0.69122400  | -0.93195200 |
| C | 1.05238000  | -0.47317200 | -0.19907000 |
| C | -0.60599200 | 0.84599400  | -1.27817900 |
| N | -1.45343000 | -0.09256200 | -0.88281600 |
| C | -1.03451500 | -1.26033700 | -0.24857400 |
| N | 0.24754700  | -1.45237400 | 0.15112500  |
| C | -1.06531500 | 2.02219600  | -2.08282800 |
| N | -1.93838900 | -2.21140300 | -0.03358200 |
| N | -3.14039900 | -1.80824700 | -0.65761300 |
| H | 5.23231200  | -1.60427600 | 1.34209000  |
| H | 6.11747300  | 0.52038200  | 0.31635300  |
| H | 4.58717700  | 2.06477600  | -0.89335100 |
| H | 2.76891300  | -2.13167600 | 1.11881900  |
| H | -0.85878500 | 2.95945600  | -1.54651900 |
| H | -0.49403000 | 2.05778700  | -3.02136500 |
| H | -2.13298600 | 1.95685300  | -2.31729500 |
| H | -3.22629100 | -2.14871200 | -1.61532700 |
| C | -3.44226500 | -0.50516600 | -0.53946000 |
| O | -3.48028600 | -0.08184100 | 0.70670300  |
| C | -3.92469000 | 1.22855200  | 1.08023900  |
| H | -4.19689400 | 1.11585400  | 2.13592400  |
| H | -4.83803900 | 1.48762800  | 0.52722200  |
| C | -2.84685300 | 2.27688000  | 0.91507100  |
| H | -3.18572000 | 3.21359200  | 1.37770700  |
| H | -1.91877700 | 1.95664200  | 1.40869400  |
| H | -2.63385400 | 2.47754500  | -0.14131700 |
| C | -4.27809700 | 0.14556100  | -1.60240900 |
| H | -3.86052000 | -0.13463200 | -2.57774500 |

|   |             |             |             |
|---|-------------|-------------|-------------|
| H | -4.19000900 | 1.23595000  | -1.51672100 |
| C | -5.74289700 | -0.29087500 | -1.48866500 |
| H | -6.16280100 | -0.03407600 | -0.50669300 |
| H | -6.33979200 | 0.20986000  | -2.26079100 |
| H | -5.83812100 | -1.37607700 | -1.62459100 |

**wb97xd/6-31+g(d,p)**

**Route 1**

**H:**

**In 3**

**TS4 (v = 293.35 i(cm-1))**

|     |             |             |             |
|-----|-------------|-------------|-------------|
| 0 1 |             |             |             |
| C   | -4.77402000 | -1.09930700 | 0.68498900  |
| C   | -5.20055800 | 0.27340800  | 0.60145900  |
| C   | -4.32956600 | 1.27706600  | 0.30171000  |
| C   | -2.95154200 | 0.96217900  | 0.06361200  |
| N   | -2.59391000 | -0.39861200 | 0.15802800  |
| C   | -3.47371300 | -1.41065200 | 0.46137300  |
| N   | -1.94676500 | 1.74424900  | -0.23330100 |
| C   | -0.86217300 | 0.89727100  | -0.35309100 |
| C   | -1.23895000 | -0.46921200 | -0.10342200 |
| C   | 0.45890200  | 1.15853300  | -0.62698700 |
| N   | 1.25924500  | 0.04586300  | -0.69473300 |
| C   | 0.80958800  | -1.26897900 | -0.37322800 |
| N   | -0.49106900 | -1.52872400 | -0.08565600 |
| C   | 1.00460100  | 2.53182900  | -0.79577200 |
| N   | 1.78316500  | -2.11995400 | -0.40734400 |
| N   | 2.86795500  | -1.37597500 | -0.80793300 |
| H   | -5.48492800 | -1.88752200 | 0.92467400  |
| H   | -6.24998100 | 0.50841300  | 0.78390700  |
| H   | -4.63670500 | 2.31961100  | 0.23543800  |
| H   | -3.04652000 | -2.41284800 | 0.50007200  |
| H   | 0.20441200  | 3.25157400  | -0.59446600 |
| H   | 1.83534800  | 2.66605000  | -0.08913200 |
| H   | 1.37965600  | 2.69338900  | -1.81651400 |
| H   | 3.78385500  | -1.80433400 | -0.79645800 |
| C   | 2.66951400  | -0.02044400 | -0.78794900 |
| O   | 3.05818600  | 0.71245900  | 0.83198600  |
| C   | 4.39438300  | 0.99981500  | 1.07519300  |
| H   | 4.44922900  | 1.50336100  | 2.06040400  |
| H   | 4.80868300  | 1.73491500  | 0.35118600  |
| C   | 5.31324500  | -0.22061300 | 1.11865900  |
| H   | 6.30522200  | 0.05010400  | 1.50909100  |
| H   | 4.87938900  | -0.99431600 | 1.76960300  |
| H   | 5.46956700  | -0.65952800 | 0.12094800  |
| C   | 3.46233500  | 0.80286500  | -1.77024900 |
| H   | 3.44767300  | 1.85636000  | -1.47189800 |
| H   | 4.50791900  | 0.47102400  | -1.68213500 |
| C   | 2.97017800  | 0.60856100  | -3.20139200 |
| H   | 1.92735500  | 0.93956300  | -3.31489100 |
| H   | 3.58928300  | 1.18698700  | -3.89877500 |
| H   | 3.01939800  | -0.45081200 | -3.48742700 |

|     |             |             |             |
|-----|-------------|-------------|-------------|
| 0 1 |             |             |             |
| C   | 3.39818900  | -3.01256700 | -0.04115500 |
| C   | 4.66260200  | -2.35812500 | 0.11918800  |
| C   | 4.75055200  | -0.99976900 | 0.20530800  |
| C   | 3.56156700  | -0.21881500 | 0.13461700  |
| N   | 2.34992900  | -0.91077100 | -0.02181800 |
| C   | 2.25920500  | -2.27997100 | -0.10921900 |
| N   | 3.39756000  | 1.09220400  | 0.19170000  |
| C   | 2.03510800  | 1.26706000  | 0.06805300  |
| C   | 1.36464200  | 0.05156900  | -0.06421800 |
| C   | 1.22047900  | 2.41508600  | 0.05353300  |
| N   | -0.09188200 | 2.26579100  | -0.08123900 |
| C   | -0.61272900 | 1.01431400  | -0.20033300 |
| N   | 0.05344000  | -0.13880500 | -0.19932200 |
| C   | 1.78950600  | 3.79095700  | 0.19075500  |
| N   | -1.97281000 | 1.01260600  | -0.34711200 |
| N   | -2.68941700 | -0.15225900 | -0.38322300 |
| H   | 3.34135200  | -4.09136500 | -0.11033800 |
| H   | 5.56325300  | -2.95997900 | 0.17139200  |
| H   | 5.69784500  | -0.48849500 | 0.32667000  |
| H   | 1.26275400  | -2.68508300 | -0.23009300 |
| H   | 2.28264100  | 3.89932500  | 1.16187100  |
| H   | 2.54884000  | 3.96570600  | -0.57730200 |
| H   | 1.00181500  | 4.53962800  | 0.10179900  |
| H   | -2.43574500 | 1.90963800  | -0.25878500 |
| C   | -3.95547600 | -0.03169500 | -0.39623200 |
| H   | -4.49111600 | 0.92200900  | -0.35234500 |
| O   | -4.70543300 | -1.13764800 | -0.50092100 |
| C   | -6.10690700 | -0.97272400 | -0.21696000 |
| H   | -6.58183200 | -1.84324600 | -0.67019100 |
| H   | -6.47453900 | -0.07571800 | -0.72801600 |
| C   | -6.37463300 | -0.91227800 | 1.27501900  |
| H   | -7.45186800 | -0.83960400 | 1.44943500  |
| H   | -6.00206400 | -1.81271600 | 1.77033000  |
| H   | -5.89825100 | -0.03851700 | 1.72990700  |

**In4**

|     |             |             |             |
|-----|-------------|-------------|-------------|
| 0 1 |             |             |             |
| C   | -2.11527800 | -2.81876200 | -0.51237800 |
| C   | -3.40640200 | -2.34271000 | -0.11867900 |
| C   | -3.60318300 | -1.02693000 | 0.17917700  |
| C   | -2.51212900 | -0.11987900 | 0.10177800  |
| N   | -1.25383500 | -0.63831200 | -0.27887900 |
| C   | -1.06173500 | -1.97073400 | -0.58895300 |
| N   | -2.46220400 | 1.17809500  | 0.33955200  |
| C   | -1.15032800 | 1.51923100  | 0.12796800  |
| C   | -0.40178500 | 0.42303000  | -0.24263700 |
| C   | -0.50399600 | 2.80458000  | 0.21535300  |
| N   | 0.77633800  | 2.92271100  | -0.01109300 |
| C   | 1.50978500  | 1.80088200  | -0.31884400 |
| N   | 0.92032900  | 0.54194000  | -0.58044600 |
| C   | -1.30440200 | 4.01453700  | 0.57058000  |
| N   | 2.79676900  | 1.76069500  | -0.39973200 |
| N   | 3.09848000  | 0.43932200  | -0.80936600 |
| H   | -1.96385200 | -3.86325700 | -0.75346700 |
| H   | -4.23188100 | -3.04295100 | -0.06189000 |
| H   | -4.56914900 | -0.63734200 | 0.47722300  |
| H   | -0.06599100 | -2.26770400 | -0.88224600 |
| H   | -2.10153600 | 4.16482500  | -0.16403300 |
| H   | -1.78662900 | 3.87252700  | 1.54254900  |
| H   | -0.66422900 | 4.89615700  | 0.60253200  |
| C   | 1.97901600  | -0.43599300 | -0.49153900 |
| H   | 1.89979200  | -1.23161600 | -1.23790900 |
| O   | 1.95378800  | -0.97768500 | 0.81070800  |
| C   | 2.78095900  | -2.13150600 | 1.01169500  |
| H   | 2.94408800  | -2.17314500 | 2.08986000  |
| H   | 3.75970300  | -1.98035100 | 0.53922100  |
| C   | 2.13724900  | -3.41900100 | 0.52289300  |
| H   | 2.77990600  | -4.26500900 | 0.78335300  |
| H   | 1.16394300  | -3.56705900 | 0.99875500  |
| H   | 2.00606700  | -3.43216600 | -0.56353200 |
| H   | 3.98171400  | 0.13693800  | -0.41480800 |

**TS3 (v = 330.31 i(cm-1))**

|     |             |             |             |
|-----|-------------|-------------|-------------|
| 0 1 |             |             |             |
| C   | -3.00233800 | -2.03689900 | -0.74688100 |
| C   | -4.05937100 | -1.17005400 | -0.31470200 |
| C   | -3.80774800 | 0.11966100  | 0.04885800  |
| C   | -2.47176200 | 0.61130100  | 0.01005100  |
| N   | -1.46821700 | -0.28575400 | -0.40799100 |
| C   | -1.72631200 | -1.58297900 | -0.79136900 |
| N   | -1.98922700 | 1.80120700  | 0.31369200  |
| C   | -0.63170600 | 1.68659300  | 0.09180500  |
| C   | -0.28805700 | 0.41430000  | -0.34817600 |

|   |             |             |             |
|---|-------------|-------------|-------------|
| C | 0.44004600  | 2.59950700  | 0.25961000  |
| N | 1.67328300  | 2.22534100  | -0.01948600 |
| C | 1.91778300  | 0.94099600  | -0.45678900 |
| N | 0.95135400  | -0.00932800 | -0.61045900 |
| C | 0.19619500  | 3.99102900  | 0.75352700  |
| N | 3.19370000  | 0.62201600  | -0.71055500 |
| N | 3.18182800  | -0.69609800 | -1.25315400 |
| H | -3.21290800 | -3.05593700 | -1.04542500 |
| H | -5.07337200 | -1.55299600 | -0.28360800 |
| H | -4.59267000 | 0.79297200  | 0.37207000  |
| H | -0.87778300 | -2.16491700 | -1.12506900 |
| H | -0.45946100 | 4.52905300  | 0.06170900  |
| H | -0.31166800 | 3.96438400  | 1.72236900  |
| H | 1.13985900  | 4.52850200  | 0.85080500  |
| H | 3.15065900  | -0.70602800 | -2.26816300 |
| C | 2.32180100  | -1.55365100 | -0.70110400 |
| H | 1.86520400  | -2.31087600 | -1.33626500 |
| O | 2.40702200  | -1.77715500 | 0.58240300  |
| C | 1.44541200  | -2.67480000 | 1.19093300  |
| H | 2.03023700  | -3.49624500 | 1.60735600  |
| H | 0.78473000  | -3.07277800 | 0.41632300  |
| C | 0.67610600  | -1.93727600 | 2.26536500  |
| H | -0.02300900 | -2.63022000 | 2.74102400  |
| H | 1.35618900  | -1.55274300 | 3.02905800  |
| H | 0.10846900  | -1.10297600 | 1.84748800  |

**Me:****In3**

|     |             |             |             |
|-----|-------------|-------------|-------------|
| 0 1 |             |             |             |
| C   | -3.44963500 | -3.11093200 | 0.01349200  |
| C   | -4.75188000 | -2.51655600 | -0.04748300 |
| C   | -4.91070500 | -1.16241300 | -0.08289200 |
| C   | -3.75887700 | -0.32523900 | -0.05903200 |
| N   | -2.50782600 | -0.95893900 | -0.00199600 |
| C   | -2.34554500 | -2.32373400 | 0.03497500  |
| N   | -3.66347500 | 0.99392400  | -0.08097800 |
| C   | -2.30678700 | 1.23436500  | -0.03570200 |
| C   | -1.56985500 | 0.05104500  | 0.01228000  |
| C   | -1.55133200 | 2.42196200  | -0.02719800 |
| N   | -0.22748100 | 2.33487600  | 0.02994200  |
| C   | 0.36167900  | 1.11015900  | 0.06495800  |
| N   | -0.24456800 | -0.07436900 | 0.05573200  |
| C   | -2.19272600 | 3.77142500  | -0.08273600 |
| N   | 1.73593600  | 1.16915800  | 0.05935200  |
| N   | 2.45686900  | 0.06261200  | 0.47981000  |
| H   | -3.33617100 | -4.18703700 | 0.04366800  |
| H   | -5.62338400 | -3.16181600 | -0.06431600 |
| H   | -5.88672700 | -0.69480900 | -0.12912900 |



|   |             |             |             |
|---|-------------|-------------|-------------|
| H | -1.32474100 | -2.68088700 | 0.08099800  |
| H | -2.70169400 | 3.90427800  | -1.04282600 |
| H | -2.95060000 | 3.86678400  | 0.70017200  |
| H | -1.44175200 | 4.55313400  | 0.03546000  |
| H | 2.09540300  | 2.08881100  | 0.28731000  |
| C | 3.71753200  | 0.09489100  | 0.24531900  |
| O | 4.38615800  | -0.94644300 | 0.78674100  |
| C | 5.73607800  | -1.24633100 | 0.40306900  |
| H | 6.09231100  | -1.90089800 | 1.19971900  |
| H | 6.34721200  | -0.33948600 | 0.42282500  |
| C | 5.80688100  | -1.95507600 | -0.93781900 |
| H | 6.84739400  | -2.21009700 | -1.15845300 |
| H | 5.22148100  | -2.87798300 | -0.91418500 |
| H | 5.43146200  | -1.32815500 | -1.75179300 |
| C | 4.44926500  | 1.19085100  | -0.47318600 |
| H | 4.80426400  | 1.94104700  | 0.24145200  |
| H | 5.31137400  | 0.82364700  | -1.02742600 |
| H | 3.77416900  | 1.67767400  | -1.17870700 |

|   |            |             |             |
|---|------------|-------------|-------------|
| H | 0.44903200 | -3.15916500 | 2.25919300  |
| H | 2.19473900 | -3.49003400 | 2.20406900  |
| H | 3.79034600 | -0.90629200 | -0.29823400 |
| C | 1.51363400 | -1.59446400 | -2.13403100 |
| H | 2.24311400 | -2.39777200 | -2.26131800 |
| H | 1.65713900 | -0.85556400 | -2.92271600 |
| H | 0.51092700 | -2.01600100 | -2.21869600 |

### TS3 (v = 262.62 i(cm-1))

|     |             |             |             |
|-----|-------------|-------------|-------------|
| O 1 |             |             |             |
| C   | -2.68770200 | -2.59275200 | -0.52729200 |
| C   | -3.90305300 | -1.94986400 | -0.12221500 |
| C   | -3.92843200 | -0.61819400 | 0.16779300  |
| C   | -2.72843200 | 0.14317900  | 0.07841300  |
| N   | -1.55468500 | -0.54027400 | -0.30007500 |
| C   | -1.53786700 | -1.88125400 | -0.61523100 |
| N   | -2.51686900 | 1.42671900  | 0.29367800  |
| C   | -1.16931700 | 1.59607000  | 0.04998200  |
| C   | -0.55293000 | 0.40212000  | -0.30851900 |
| C   | -0.33329200 | 2.73784300  | 0.12060700  |
| N   | 0.94616400  | 2.63291600  | -0.17517900 |
| C   | 1.46939500  | 1.40814900  | -0.53163500 |
| N   | 0.75009600  | 0.24625200  | -0.57082200 |
| C   | -0.88311100 | 4.06967900  | 0.52609800  |
| N   | 2.77361800  | 1.37669700  | -0.82161600 |
| N   | 3.06489200  | 0.05592300  | -1.25869800 |
| H   | -2.67759800 | -3.64692700 | -0.77365300 |
| H   | -4.81344300 | -2.53522600 | -0.05675300 |
| H   | -4.83737300 | -0.10880700 | 0.46505100  |
| H   | -0.59049700 | -2.28855100 | -0.93778600 |
| H   | -1.65247300 | 4.39151200  | -0.18284900 |
| H   | -1.36074800 | 3.99828600  | 1.50793500  |
| H   | -0.08821100 | 4.81528200  | 0.55924200  |
| H   | 3.05018800  | -0.03763300 | -2.26908900 |
| C   | 2.44103900  | -0.94114700 | -0.61629900 |
| O   | 2.61180100  | -0.93726100 | 0.69231300  |
| C   | 1.82665900  | -1.81377000 | 1.52721400  |
| H   | 2.21978300  | -2.82988500 | 1.43806900  |
| H   | 0.78973000  | -1.78802700 | 1.17984900  |
| C   | 1.93126100  | -1.29711900 | 2.94330200  |
| H   | 1.35538400  | -1.94900700 | 3.60508500  |
| H   | 2.97062100  | -1.29129300 | 3.28075700  |
| H   | 1.52642300  | -0.28451700 | 3.01447000  |
| C   | 2.16161100  | -2.21507500 | -1.34993900 |
| H   | 3.11431000  | -2.73360100 | -1.49644600 |
| H   | 1.51418600  | -2.87676300 | -0.77812500 |
| H   | 1.70783900  | -2.01156400 | -2.31895900 |

### In4

|     |             |             |             |
|-----|-------------|-------------|-------------|
| O 1 |             |             |             |
| C   | -2.80471400 | -2.27946400 | -0.38082600 |
| C   | -3.95879400 | -1.47135500 | -0.13165700 |
| C   | -3.83075200 | -0.13089700 | 0.07721200  |
| C   | -2.54429400 | 0.46917400  | 0.02224100  |
| N   | -1.43892600 | -0.35548300 | -0.29565200 |
| C   | -1.56997500 | -1.72607300 | -0.44995200 |
| N   | -2.18672600 | 1.72042800  | 0.23818600  |
| C   | -0.82775200 | 1.72834100  | 0.06146000  |
| C   | -0.35628600 | 0.47770100  | -0.28825200 |
| C   | 0.11307300  | 2.80200500  | 0.24760200  |
| N   | 1.39563800  | 2.58814700  | 0.13727000  |
| C   | 1.84044700  | 1.33027400  | -0.19649000 |
| N   | 0.97144200  | 0.28527600  | -0.56442000 |
| C   | -0.37925800 | 4.16682300  | 0.60340700  |
| N   | 3.08308300  | 0.98329100  | -0.23900600 |
| N   | 3.09645400  | -0.32706600 | -0.75737500 |
| H   | -2.90079900 | -3.35152700 | -0.49776100 |
| H   | -4.93539300 | -1.93950400 | -0.08746600 |
| H   | -4.67843500 | 0.50674400  | 0.29795200  |
| H   | -0.65626000 | -2.28962100 | -0.56322100 |
| H   | -1.08996500 | 4.51927500  | -0.14995600 |
| H   | -0.91443200 | 4.13312500  | 1.55757500  |
| H   | 0.45540300  | 4.86398100  | 0.67740500  |
| C   | 1.75800600  | -0.93021000 | -0.78670900 |
| O   | 1.51725300  | -1.90812400 | 0.19482700  |
| C   | 1.64516700  | -1.50369800 | 1.56358600  |
| H   | 0.89146100  | -0.74122600 | 1.79594100  |
| H   | 2.63593200  | -1.06484400 | 1.73091000  |
| C   | 1.44091600  | -2.73015300 | 2.42628200  |
| H   | 1.52590900  | -2.45676200 | 3.48144200  |

**Et:**

**In3**

0 1

|   |             |             |             |
|---|-------------|-------------|-------------|
| C | 3.97795500  | -2.99419900 | 0.23853600  |
| C | 5.23564200  | -2.31244800 | 0.16199700  |
| C | 5.29888600  | -0.95502000 | 0.04492100  |
| C | 4.09044400  | -0.20284400 | -0.00232300 |
| N | 2.88665100  | -0.92097000 | 0.07289400  |
| C | 2.82065400  | -2.28912700 | 0.19226300  |
| N | 3.90197400  | 1.10199400  | -0.10890600 |
| C | 2.53054500  | 1.24556800  | -0.10375700 |
| C | 1.87941400  | 0.01724500  | 0.00584900  |
| C | 1.69139200  | 2.37242800  | -0.18620400 |
| N | 0.37578200  | 2.19236900  | -0.16131700 |
| C | -0.12397900 | 0.93251700  | -0.05190000 |
| N | 0.56650900  | -0.20156500 | 0.03798800  |
| C | 2.23853900  | 3.75946700  | -0.29692100 |
| N | -1.49544000 | 0.89975200  | -0.00713300 |
| N | -2.16716100 | -0.28612400 | -0.12824000 |
| H | 3.94064500  | -4.07175100 | 0.33481300  |
| H | 6.15128200  | -2.89237000 | 0.19907800  |
| H | 6.24082900  | -0.42333000 | -0.01412600 |
| H | 1.82729100  | -2.71575800 | 0.24415000  |
| H | 2.76297300  | 4.02798100  | 0.62592400  |
| H | 2.96759500  | 3.81788700  | -1.10999600 |
| H | 1.43432500  | 4.47475500  | -0.47157900 |
| H | -1.94830900 | 1.78327400  | -0.20630100 |
| C | -3.44575300 | -0.25025000 | -0.17376100 |
| O | -4.02294300 | -1.47816500 | -0.14712000 |
| C | -5.25306900 | -1.71618600 | -0.85249800 |
| H | -5.13086200 | -2.70661500 | -1.29651400 |
| H | -5.36296400 | -1.00085800 | -1.67277700 |
| C | -6.44871800 | -1.69886200 | 0.08151400  |
| H | -7.35197400 | -1.96461900 | -0.47556900 |
| H | -6.31337700 | -2.42789400 | 0.88506700  |
| H | -6.60141800 | -0.71363800 | 0.53053000  |
| C | -4.30934800 | 0.98346700  | -0.10705900 |
| H | -3.85258200 | 1.79102500  | -0.68777500 |
| H | -5.27452000 | 0.79955400  | -0.58004000 |
| C | -4.52307900 | 1.42899000  | 1.34868600  |
| H | -3.57161800 | 1.65081600  | 1.83977300  |
| H | -5.14241500 | 2.32852300  | 1.37741500  |
| H | -5.02672100 | 0.64568500  | 1.92183400  |

**In4**

0 1

|   |             |             |             |
|---|-------------|-------------|-------------|
| C | 2.69752900  | -2.45568400 | 0.32297600  |
| C | 3.92181500  | -1.72234800 | 0.22059500  |
| C | 3.90570200  | -0.36962700 | 0.05580500  |
| C | 2.66310200  | 0.31781200  | 0.01232000  |
| N | 1.48065800  | -0.43770300 | 0.19470800  |
| C | 1.50200000  | -1.81902800 | 0.29999300  |
| N | 2.41135200  | 1.59763000  | -0.18479700 |
| C | 1.04505200  | 1.69551000  | -0.12763300 |
| C | 0.46227100  | 0.46957100  | 0.12850300  |
| C | 0.19680500  | 2.83515900  | -0.36031100 |
| N | -1.10241500 | 2.70856900  | -0.36098700 |
| C | -1.65910800 | 1.48015200  | -0.09092000 |
| N | -0.89258300 | 0.35845500  | 0.27020000  |
| C | 0.80773900  | 4.17190200  | -0.62762400 |
| N | -2.92663800 | 1.23240600  | -0.10276600 |
| N | -3.06150600 | -0.08285800 | 0.38306900  |
| H | 2.70924200  | -3.53560000 | 0.40153100  |
| H | 4.86498100  | -2.25563300 | 0.25332500  |
| H | 4.81298200  | 0.21199800  | -0.05484100 |
| H | 0.54426800  | -2.31811200 | 0.30560900  |
| H | 1.41158600  | 4.48424500  | 0.23014300  |
| H | 1.48114500  | 4.11396400  | -1.48809400 |
| H | 0.03103600  | 4.91280800  | -0.81716000 |
| C | -1.77832000 | -0.78819700 | 0.46767000  |
| O | -1.57814800 | -1.78981400 | -0.49865600 |
| C | -1.63252100 | -1.38901100 | -1.87322000 |
| H | -0.84647100 | -0.65098600 | -2.07462800 |
| H | -2.60077500 | -0.92098800 | -2.08649900 |
| C | -1.42928400 | -2.62662200 | -2.72020500 |
| H | -1.46614800 | -2.35860800 | -3.77956600 |
| H | -0.45668300 | -3.08141500 | -2.51285500 |
| H | -2.21136900 | -3.36465000 | -2.52294500 |
| H | -3.77944900 | -0.59978200 | -0.11103800 |
| C | -1.63684900 | -1.47285500 | 1.83122200  |
| H | -0.74386000 | -2.10247300 | 1.84304400  |
| H | -2.49738100 | -2.14412300 | 1.91911200  |
| C | -1.60145600 | -0.48969400 | 2.99499100  |
| H | -1.60767100 | -1.03155600 | 3.94395700  |
| H | -0.69852800 | 0.12820200  | 2.96702600  |
| H | -2.47066500 | 0.17348100  | 2.97216600  |

**TS3 (v = 190.53 i(cm-1))**

0 1

|   |             |             |             |
|---|-------------|-------------|-------------|
| C | -1.58340800 | 3.28383500  | 0.39852500  |
| C | -3.01363600 | 3.17927900  | 0.43299800  |
| C | -3.63817100 | 1.97349800  | 0.30604100  |
| C | -2.85707300 | 0.79476400  | 0.13357400  |
| N | -1.45826600 | 0.95667300  | 0.09854500  |
| C | -0.82613500 | 2.17226000  | 0.23331100  |
| N | -3.22249900 | -0.46647400 | -0.00342000 |

|   |             |             |             |
|---|-------------|-------------|-------------|
| C | -2.03148500 | -1.15526000 | -0.13431400 |
| C | -0.93821100 | -0.30007400 | -0.07774700 |
| C | -1.73190100 | -2.53299100 | -0.28322400 |
| N | -0.47579700 | -2.92996100 | -0.37861000 |
| C | 0.53859700  | -1.99925200 | -0.32656100 |
| N | 0.34024500  | -0.66453200 | -0.16580200 |
| C | -2.82262200 | -3.55693400 | -0.32773200 |
| N | 1.79720000  | -2.45271200 | -0.40338100 |
| N | 2.64700300  | -1.31356000 | -0.50649900 |
| H | -1.09933800 | 4.24612600  | 0.50659600  |
| H | -3.60175400 | 4.08073600  | 0.56494600  |
| H | -4.71699000 | 1.87634400  | 0.33390000  |
| H | 0.25627900  | 2.15239300  | 0.20138500  |
| H | -2.40360100 | -4.54957200 | -0.49490800 |
| H | -3.37987300 | -3.55253100 | 0.61454400  |
| H | -3.53521300 | -3.31943900 | -1.12326600 |
| H | 2.89228800  | -1.11869900 | -1.47130100 |
| C | 2.32170400  | -0.24261700 | 0.24292500  |
| O | 2.62668900  | 0.97574300  | -0.14652800 |
| C | 2.72785200  | 1.28699700  | -1.55681600 |
| H | 1.84617900  | 0.86754000  | -2.05312200 |
| H | 3.63683900  | 0.83058900  | -1.95900500 |
| C | 2.78460700  | 2.79149000  | -1.68582400 |
| H | 2.87575800  | 3.05211700  | -2.74312500 |
| H | 1.87707900  | 3.25624700  | -1.29330100 |
| H | 3.65010900  | 3.19441800  | -1.15478300 |
| C | 2.20387000  | -0.36651300 | 1.73600400  |
| H | 1.51218700  | 0.40365700  | 2.08280500  |
| H | 1.77888500  | -1.34218600 | 1.97297200  |
| C | 3.57574300  | -0.20759400 | 2.40282300  |
| H | 4.00474600  | 0.77768200  | 2.20514300  |
| H | 3.46443400  | -0.32234500 | 3.48346600  |
| H | 4.27488900  | -0.97039400 | 2.04953400  |

|   |             |             |             |
|---|-------------|-------------|-------------|
| C | -5.10697300 | 0.02669600  | 0.22551000  |
| C | -3.72064300 | 0.34396400  | 0.13882200  |
| N | -2.82715900 | -0.73008500 | -0.00529800 |
| C | -3.21962000 | -2.04650200 | -0.06629100 |
| N | -3.11232900 | 1.51657700  | 0.17333200  |
| C | -1.77305800 | 1.20619500  | 0.04719600  |
| C | -1.56833600 | -0.17119600 | -0.06526600 |
| C | -0.61280700 | 1.99529400  | 0.01554100  |
| N | 0.57356200  | 1.40211300  | -0.11796600 |
| C | 0.62623100  | 0.05639500  | -0.22123200 |
| N | -0.40656000 | -0.79769900 | -0.19909300 |
| C | -0.66919500 | 3.48633700  | 0.11727500  |
| N | 1.84809100  | -0.54114400 | -0.37521600 |
| N | 3.01790600  | 0.16652500  | -0.35591400 |
| H | -4.86500700 | -3.36743800 | -0.02994300 |
| H | -6.55109100 | -1.52753700 | 0.23294300  |
| H | -5.81649800 | 0.83769900  | 0.33690900  |
| H | -2.42766900 | -2.77567600 | -0.17901400 |
| H | -1.11588900 | 3.90566300  | -0.79039300 |
| H | -1.30070600 | 3.78976900  | 0.95691500  |
| H | 0.33267200  | 3.89822500  | 0.24225800  |
| H | 1.85459500  | -1.55446600 | -0.38976200 |
| C | 4.08733300  | -0.51987600 | -0.40295400 |
| H | 4.12561500  | -1.61390300 | -0.42649900 |
| O | 5.26361900  | 0.12197700  | -0.46353600 |
| C | 6.42698100  | -0.68398000 | -0.20214100 |
| H | 7.25536000  | -0.12012400 | -0.63196800 |
| H | 6.33813800  | -1.63129900 | -0.74619300 |
| C | 6.62756500  | -0.91385300 | 1.28384500  |
| H | 7.54650200  | -1.48472200 | 1.44457400  |
| H | 6.71538300  | 0.03921000  | 1.81206000  |
| H | 5.79546300  | -1.47878100 | 1.71472100  |

#### In4

O 1

|   |             |             |             |
|---|-------------|-------------|-------------|
| C | -4.86731800 | -1.07175200 | 0.43530000  |
| C | -5.25111800 | 0.31108500  | 0.35096600  |
| C | -4.33355600 | 1.29354000  | 0.13889200  |
| C | -2.95511200 | 0.94434600  | -0.00381600 |
| N | -2.63641000 | -0.42353600 | 0.08960700  |
| C | -3.56563600 | -1.41717400 | 0.30315600  |
| N | -1.90930900 | 1.70937100  | -0.21370000 |
| C | -0.84039000 | 0.82384500  | -0.26566200 |
| C | -1.26989600 | -0.52609300 | -0.07989500 |
| C | 0.50312000  | 1.04072200  | -0.44479500 |
| N | 1.26338800  | -0.08932200 | -0.46858700 |
| C | 0.76642500  | -1.39992300 | -0.26761800 |
| N | -0.56393400 | -1.62534000 | -0.06477800 |
| C | 1.14205100  | 2.37383800  | -0.61703300 |

#### Route 2

H:

#### In 3

O 1

|   |             |             |            |
|---|-------------|-------------|------------|
| C | -4.54147600 | -2.33549200 | 0.01738600 |
| C | -5.49773400 | -1.27839000 | 0.16610200 |

|   |             |             |             |
|---|-------------|-------------|-------------|
| N | 1.70012400  | -2.29391600 | -0.31433200 |
| N | 2.88427500  | -1.58337000 | -0.68601900 |
| H | -5.61134900 | -1.83949200 | 0.60331100  |
| H | -6.29883200 | 0.56896800  | 0.46071000  |
| H | -4.60799300 | 2.33920300  | 0.07171200  |
| H | -3.17610300 | -2.42605800 | 0.35167000  |
| H | 0.37855600  | 3.15045800  | -0.59458000 |
| H | 1.86385400  | 2.55588000  | 0.18424700  |
| H | 1.67439000  | 2.42522100  | -1.57158300 |
| H | 3.67572300  | -1.96077400 | -0.17679800 |
| C | 2.71066900  | -0.16331300 | -0.42301400 |
| O | 3.14641100  | 0.27572100  | 0.84205200  |
| C | 4.38727000  | 0.99032100  | 0.84367700  |
| H | 4.45113500  | 1.43694500  | 1.83732400  |
| H | 4.33684200  | 1.80594900  | 0.10945300  |
| C | 5.58887800  | 0.09912200  | 0.57455600  |
| H | 6.50836900  | 0.68525800  | 0.66063300  |
| H | 5.63309900  | -0.71856100 | 1.29979500  |
| H | 5.56134100  | -0.32521400 | -0.43453200 |
| H | 3.18041300  | 0.44784800  | -1.20140800 |

|   |             |             |            |
|---|-------------|-------------|------------|
| O | -3.55534900 | -0.23391600 | 0.79742000 |
| C | -3.78890600 | 1.17509600  | 1.04100100 |
| H | -4.80513800 | 1.25804700  | 1.43099100 |
| H | -3.72699600 | 1.71620400  | 0.09333300 |
| C | -2.76396900 | 1.67363600  | 2.03587700 |
| H | -2.93288900 | 2.73738100  | 2.22335800 |
| H | -2.85186100 | 1.13747200  | 2.98379500 |
| H | -1.74901600 | 1.54289700  | 1.65152400 |

Me:

In3

O 1

|   |             |             |             |
|---|-------------|-------------|-------------|
| C | -4.84170900 | -2.26841800 | -0.06610900 |
| C | -5.79042900 | -1.19503000 | -0.03446800 |
| C | -5.38637300 | 0.10682500  | 0.00638500  |
| C | -3.99314600 | 0.40393700  | 0.01798400  |
| N | -3.10782000 | -0.68511300 | -0.01487700 |
| C | -3.51322100 | -1.99822100 | -0.05586100 |
| N | -3.37189700 | 1.57035300  | 0.05538300  |
| C | -2.03214100 | 1.23970900  | 0.04794300  |
| C | -1.84011400 | -0.14349700 | 0.00524200  |
| C | -0.86119700 | 2.01308500  | 0.07457500  |
| N | 0.32219400  | 1.39843200  | 0.07104700  |
| C | 0.36338300  | 0.05073200  | 0.02022200  |
| N | -0.68015400 | -0.78676400 | -0.02373400 |
| C | -0.90253300 | 3.50767200  | 0.10672200  |
| N | 1.59335200  | -0.57025700 | 0.07389100  |
| N | 2.71985700  | 0.11923100  | -0.35227300 |
| H | -5.17602500 | -3.29747700 | -0.09873500 |
| H | -6.84934700 | -1.42906300 | -0.04388700 |
| H | -6.09035700 | 0.92981300  | 0.03015600  |
| H | -2.72519300 | -2.73980900 | -0.07714600 |
| H | -1.32290000 | 3.89130200  | -0.82874700 |
| H | -1.55125300 | 3.85463700  | 0.91617300  |
| H | 0.10046100  | 3.91385100  | 0.24038600  |
| H | 1.53799500  | -1.55687500 | -0.15323500 |
| C | 3.84128600  | -0.46218400 | -0.13055400 |
| O | 4.90700400  | 0.23499600  | -0.57807800 |
| C | 6.21859800  | -0.34872400 | -0.61612900 |
| H | 6.68133300  | 0.08276000  | -1.50576100 |
| H | 6.14987400  | -1.42854600 | -0.77057700 |
| C | 7.02424600  | 0.00087300  | 0.62185300  |
| H | 8.03434200  | -0.40765500 | 0.52411100  |
| H | 7.09968700  | 1.08547500  | 0.73541700  |
| H | 6.57552600  | -0.41098500 | 1.53014800  |
| C | 4.01540900  | -1.78887300 | 0.54937700  |
| H | 3.92090100  | -2.61018900 | -0.16888400 |
| H | 4.98252200  | -1.87924700 | 1.04108500  |

TS3 ( $\nu = 336.61 \text{ i}(\text{cm}^{-1})$ )

O 1

|   |             |             |             |
|---|-------------|-------------|-------------|
| C | 4.58300300  | -1.06791000 | 0.74374600  |
| C | 5.02437600  | 0.25735900  | 0.41367400  |
| C | 4.15668700  | 1.19615200  | -0.05824400 |
| C | 2.78167300  | 0.85595400  | -0.22745100 |
| N | 2.40332300  | -0.45477900 | 0.11468900  |
| C | 3.27907900  | -1.40305400 | 0.58925400  |
| N | 1.77324800  | 1.58334800  | -0.66345400 |
| C | 0.68804700  | 0.72477900  | -0.60903800 |
| C | 1.04604300  | -0.54531100 | -0.12676700 |
| C | -0.66395400 | 0.89923300  | -0.91259700 |
| N | -1.47146300 | -0.14091600 | -0.72087500 |
| C | -1.02233200 | -1.36812700 | -0.27053400 |
| N | 0.27592500  | -1.60328300 | 0.05352300  |
| C | -1.23289200 | 2.19544800  | -1.39381900 |
| N | -1.91234800 | -2.36162900 | -0.13357100 |
| N | -3.15136000 | -1.90886300 | -0.67845800 |
| H | 5.28408100  | -1.80435400 | 1.11507200  |
| H | 6.07114100  | 0.50861800  | 0.54569900  |
| H | 4.47338400  | 2.20103100  | -0.31105000 |
| H | 2.85200100  | -2.37311300 | 0.80954700  |
| H | -1.46077000 | 2.84099000  | -0.53806300 |
| H | -0.50956500 | 2.72347400  | -2.01801600 |
| H | -2.15199000 | 2.02879700  | -1.95780400 |
| H | -3.26900300 | -2.16929300 | -1.65253800 |
| C | -3.45480000 | -0.62667500 | -0.44882700 |
| H | -3.99419800 | -0.07344300 | -1.21583900 |

H 3.23533100 -1.90644300 1.30497500

C 3.54726300 -1.43953400 0.46263900

N 2.06568600 1.66852800 -0.48523100

C 0.97010400 0.81992100 -0.50417500

C 1.31942700 -0.49499700 -0.15515700

C -0.38411000 1.03875400 -0.76754000

N -1.20750100 -0.00405800 -0.66933200

C -0.75556500 -1.28092200 -0.38541200

N 0.54126700 -1.55894700 -0.08681700

C -0.92907300 2.38444300 -1.13140900

N -1.64253600 -2.28298500 -0.39331500

N -2.87594700 -1.76112600 -0.88085600

H 5.55042300 -1.90872800 0.93708700

H 6.36003600 0.43885900 0.57942300

H 4.77545800 2.22079100 -0.10154200

H 3.11100800 -2.42137800 0.59532300

H -0.12936700 3.03044400 -1.49673500

H -1.69980200 2.29366000 -1.89920200

H -1.37234000 2.86845500 -0.25506200

H -2.97695000 -1.88547000 -1.88275100

C -3.19209800 -0.51903200 -0.46987300

O -3.23851200 -0.38780100 0.84502900

C -3.46595600 0.90775900 1.43205600

H -4.47782300 1.24011800 1.18454700

H -2.73924500 1.60959800 1.01398800

C -3.28181200 0.75992500 2.92476900

H -3.44885500 1.72726400 3.40514000

H -3.99581900 0.04118500 3.33466100

H -2.26724400 0.42681000 3.15680900

C -4.01405200 0.37085000 -1.34668800

H -3.78969200 0.18889800 -2.39692600

H -3.82293200 1.41991500 -1.12498900

H -5.07299100 0.17049100 -1.15728700

**Et:**

**In3**

0 1

C -4.90786900 -2.38974600 -0.09734800

C -5.91856600 -1.38357000 0.04305000

C -5.59474500 -0.06202300 0.13303200

C -4.22427300 0.32426000 0.08710800

N -3.27536500 -0.70161600 -0.05074100

C -3.60016100 -2.03469400 -0.14196100

N -3.67598100 1.52508300 0.15471900

C -2.32066500 1.28367700 0.05801300

C -2.04490400 -0.08016800 -0.06979300

C -1.20113600 2.12998800 0.06518700

N 0.01578300 1.59747500 -0.04942400

C 0.13824600 0.25872800 -0.16308600

**TS3 (v = 258.14 i(cm-1))**

0 1

C 4.85556500 -1.13392900 0.63951100

C 5.30969100 0.21201500 0.43258500

C 4.44913700 1.20011900 0.05858000

C 3.06893000 0.89204100 -0.13088300

N 2.67896200 -0.44183800 0.08601700

|   |             |             |             |
|---|-------------|-------------|-------------|
| N | -0.84952000 | -0.64558200 | -0.17781000 |
| C | -1.33275700 | 3.61484500  | 0.18475000  |
| N | 1.39572600  | -0.27685000 | -0.30854100 |
| N | 2.51540500  | 0.47795100  | -0.08669300 |
| H | -5.17764300 | -3.43560000 | -0.16934700 |
| H | -6.95952500 | -1.68585500 | 0.07792000  |
| H | -6.34556900 | 0.71162200  | 0.23864700  |
| H | -2.77049400 | -2.72222600 | -0.24497100 |
| H | -1.79561500 | 4.02327500  | -0.71969000 |
| H | -1.98230900 | 3.87600900  | 1.02495800  |
| H | -0.35281300 | 4.07336300  | 0.32059500  |
| H | 1.42936500  | -1.28778600 | -0.27162400 |
| C | 3.65300300  | -0.10281700 | -0.15691200 |
| O | 4.69291200  | 0.69052400  | 0.21053200  |
| C | 5.94954000  | 0.59009000  | -0.48209900 |
| H | 6.28060600  | 1.62313600  | -0.61069400 |
| H | 5.79809000  | 0.16765100  | -1.47995000 |
| C | 6.97260400  | -0.19561700 | 0.31664700  |
| H | 7.93900500  | -0.16039000 | -0.19484200 |
| H | 7.09438000  | 0.24185800  | 1.31134300  |
| H | 6.68551600  | -1.24428000 | 0.43187000  |
| C | 3.90627200  | -1.55793900 | -0.45420800 |
| H | 3.16681600  | -1.91920700 | -1.17518800 |
| H | 4.87469900  | -1.67635800 | -0.94317100 |
| C | 3.87314200  | -2.40742300 | 0.82736900  |
| H | 2.90242100  | -2.34409700 | 1.32770800  |
| H | 4.06542500  | -3.45588600 | 0.58841700  |
| H | 4.63564100  | -2.07018800 | 1.53470300  |

|   |             |             |             |
|---|-------------|-------------|-------------|
| H | 3.50026100  | -2.48126200 | 0.08611600  |
| H | 0.00440200  | 3.11831300  | -0.36022200 |
| H | -1.58337900 | 2.44045800  | -0.80177800 |
| H | -1.18919300 | 2.76251500  | 0.89743100  |
| H | -3.33923600 | -1.97318300 | -0.03578500 |
| C | -2.43940100 | -0.13006100 | 0.16427400  |
| O | -2.72301800 | 0.15111200  | -1.19809100 |
| C | -4.04352300 | 0.52766600  | -1.59963700 |
| H | -3.91895800 | 0.81619300  | -2.64516800 |
| H | -4.37107100 | 1.41720700  | -1.05106100 |
| C | -5.07457200 | -0.58595300 | -1.49001600 |
| H | -6.00959300 | -0.25399800 | -1.95047600 |
| H | -4.73547700 | -1.48319700 | -2.01636900 |
| H | -5.29936900 | -0.84556000 | -0.45070400 |
| C | -3.20670500 | 0.75604400  | 1.15283600  |
| H | -3.23145700 | 1.78813000  | 0.79691500  |
| H | -4.24133200 | 0.39900300  | 1.15760100  |
| C | -2.65008900 | 0.69272800  | 2.57168800  |
| H | -1.64322800 | 1.11685600  | 2.63364900  |
| H | -3.29359100 | 1.26100600  | 3.24775600  |
| H | -2.60466600 | -0.34133600 | 2.92258700  |

### TS3 ( $\nu = 234.35 \text{ i}(\text{cm}^{-1})$ )

O 1

|   |             |             |             |
|---|-------------|-------------|-------------|
| C | 5.15661900  | -1.12600000 | 0.52037900  |
| C | 5.59328400  | 0.20697200  | 0.21644600  |
| C | 4.70893700  | 1.17323700  | -0.15983500 |
| C | 3.32172200  | 0.85467600  | -0.25283400 |
| N | 2.94863900  | -0.46507400 | 0.06024000  |
| C | 3.84098000  | -1.44096200 | 0.43722900  |
| N | 2.29626500  | 1.60940100  | -0.59256500 |
| C | 1.20574300  | 0.76076300  | -0.49795700 |
| C | 1.57743900  | -0.53083700 | -0.09923900 |
| C | -0.16234400 | 0.96765400  | -0.70189200 |
| N | -0.98077400 | -0.06015900 | -0.48941500 |
| C | -0.50449900 | -1.32644600 | -0.18211500 |
| N | 0.80551700  | -1.59101800 | 0.06123200  |
| C | -0.69743800 | 2.28645600  | -1.16230700 |
| N | -1.38873300 | -2.32788500 | -0.11786000 |
| N | -2.64769100 | -1.81128900 | -0.54613500 |
| H | 5.87008800  | -1.88409700 | 0.81682400  |
| H | 6.64946800  | 0.44199300  | 0.29074100  |
| H | 5.02143100  | 2.18437400  | -0.39208900 |
| H | 3.41684000  | -2.41511400 | 0.64476300  |
| H | -0.45578000 | 3.07241500  | -0.44094200 |
| H | -0.21716800 | 2.55906500  | -2.10647200 |
| H | -1.77511200 | 2.24995500  | -1.31615900 |
| H | -2.77261500 | -1.90156500 | -1.55032500 |
| C | -2.94025800 | -0.56727500 | -0.10619700 |

### In4

O 1

|   |             |             |             |
|---|-------------|-------------|-------------|
| C | 5.19811000  | -1.15797700 | -0.17397800 |
| C | 5.58255800  | 0.21873100  | -0.32818500 |
| C | 4.66028700  | 1.21955100  | -0.33780600 |
| C | 3.27576600  | 0.89628200  | -0.19236600 |
| N | 2.95731800  | -0.46690800 | -0.04496000 |
| C | 3.89079500  | -1.47887900 | -0.03506200 |
| N | 2.22368800  | 1.68101300  | -0.17705000 |
| C | 1.14980600  | 0.81361700  | -0.01255900 |
| C | 1.58305700  | -0.54178500 | 0.07080900  |
| C | -0.19939700 | 1.05998200  | 0.06091900  |
| N | -0.97838500 | -0.04355100 | 0.26082800  |
| C | -0.47163500 | -1.36933900 | 0.27146400  |
| N | 0.86819700  | -1.62484600 | 0.20493600  |
| C | -0.78176000 | 2.42604200  | -0.06033600 |
| N | -1.40111900 | -2.26255100 | 0.35079600  |
| N | -2.61477300 | -1.54131700 | 0.52648200  |
| H | 5.94597300  | -1.94009800 | -0.16858900 |
| H | 6.63463200  | 0.45665000  | -0.44125700 |
| H | 4.93515300  | 2.26062900  | -0.45541300 |

|   |             |             |             |
|---|-------------|-------------|-------------|
| O | -2.90173300 | -0.45894100 | 1.20764500  |
| C | -3.33631300 | 0.71701100  | 1.92377200  |
| H | -3.55761200 | 0.32384500  | 2.91586300  |
| H | -4.26712300 | 1.09456500  | 1.49515400  |
| C | -2.26676000 | 1.78630800  | 1.99447800  |
| H | -2.58060200 | 2.54466200  | 2.71662100  |
| H | -1.31561100 | 1.36193300  | 2.32531000  |
| H | -2.11982000 | 2.27845200  | 1.03275300  |
| C | -3.82856700 | 0.30853500  | -0.94447900 |
| H | -3.45092400 | 0.28705000  | -1.96847900 |
| H | -3.74882300 | 1.34057200  | -0.59939000 |
| C | -5.29079600 | -0.15884600 | -0.89764700 |
| H | -5.68269600 | -0.16554600 | 0.12278900  |
| H | -5.90425000 | 0.51927000  | -1.49427800 |
| H | -5.39489800 | -1.16559200 | -1.30913900 |
